# Supplementary material for: Tracing mother-infant transmission of bacteriophages by means of a novel analytical tool for shotgun metagenomic datasets: METAnnotatorX
Source: Microbiome. 2018 Aug 20;6:145. doi: 10.1186/s40168-018-0527-z (PMC6102903; doi:10.1186/s40168-018-0527-z)
Supplement: Supplementary file 2 — Archaeal and bacterial viruses profiled in the analyzed samples. (XLSX 152 kb) [file 40168_2018_527_MOESM2_ESM.xlsx]

## Sheet: archaeal and bacterial viruses
Taxonomy	Infant1	Infant2	Infant3	Infant4	Infant5	Infant6	Infant7	Mother1	Mother2	Mother3	Mother4	Mother5	Mother6	Mother7
Viral_archaea__Bicaudaviridae Bicaudavirus__Acidianus two-tailed virus	0	0	0	0	0	0	0	0	0.0034063	0	0	0	0	0
Viral_archaea__Halorubrum phage HF2 Halorubrum phage HF2_Unclassified__Halorubrum phage HF2	0	0	0	0	0	0	0.000154787	3.57962e-06	2.64054e-05	0	0	0	0	0
Viral_archaea__Halovirus HCTV-1 Halovirus HCTV-1_Unclassified__Halovirus HCTV-1	1.57408e-06	0	3.03801e-05	0	0	0	7.73934e-05	7.15925e-06	0.000158433	1.12523e-05	4.43498e-05	1.77695e-05	0.000162748	0.000103329
Viral_archaea__Halovirus HGTV-1 Halovirus HGTV-1_Unclassified__Halovirus HGTV-1	2.62347e-06	0	2.02534e-05	3.8586e-05	2.5752e-05	5.01731e-05	0.000154787	1.78981e-06	0.00029046	3.37568e-05	7.09597e-05	9.35235e-07	0.000287939	0.000103329
Viral_archaea__Halovirus HVTV-1 Halovirus HVTV-1_Unclassified__Halovirus HVTV-1	0	0	1.01267e-05	0	0	0	0.00023218	1.78981e-06	0	4.50091e-05	1.77399e-05	0	0	4.13317e-05
Viral_archaea__Lipothrixviridae Betalipothrixvirus__Acidianus filamentous virus 9	0	0	0	0	5.15039e-05	0	0.00247659	0	0	0	0	0	0	0
Viral_archaea__Myoviridae Myoviridae_Unclassified__Natrialba phage PhiCh1	1.57408e-06	0	4.05067e-05	0.000137807	0.000231768	0.000526818	0.000309574	3.04268e-05	0.000475298	0.000832668	0.000168529	6.45312e-05	0.000625955	0
Viral_archaea__Siphoviridae Siphoviridae_Unclassified__Methanobacterium phage psiM2	0	0	0	0	0	0	7.73934e-05	0	0	9.00181e-05	8.86997e-06	1.87047e-06	0.000100153	0
Viral_bacteria__Aurantimonas phage AmM-1 Aurantimonas phage AmM-1_Unclassified__Aurantimonas phage AmM-1	5.77162e-06	0	3.03801e-05	1.10246e-05	0	0	0.00890024	0	0.000105622	0	1.77399e-05	9.35235e-07	6.25955e-05	4.13317e-05
Viral_bacteria__Bacillus phage BalMu-1 Bacillus phage BalMu-1_Unclassified__Bacillus phage BalMu-1	1.04939e-06	0	2.02534e-05	3.30737e-05	5.15039e-05	5.01731e-05	0.000541754	8.94906e-06	0.00161073	0.0004951	0.00010644	1.68342e-05	0.000287939	0
Viral_bacteria__Bacillus virus 1 Bacillus virus 1_Unclassified__Bacillus virus 1	4.72224e-06	0	2.02534e-05	0.000110246	0.000412031	0.314987	0.0143952	0.000524415	0.00471337	0.0566889	0.00855065	7.85597e-05	0.0276797	4.13317e-05
Viral_bacteria__Brucella phage BiPBO1 Brucella phage BiPBO1_Unclassified__Brucella phage BiPBO1	5.24693e-07	0	1.01267e-05	0	0	0	0	1.78981e-06	0.000567717	1.12523e-05	0	0	0	2.06659e-05
Viral_bacteria__Celeribacter phage P12053L Celeribacter phage P12053L_Unclassified__Celeribacter phage P12053L	0	0	0	5.51228e-06	0	0	0	0	0	0	0	0	0.000262901	0
Viral_bacteria__Clostridium phage phiCT19406A Clostridium phage phiCT19406A_Unclassified__Clostridium phage phiCT19406A	1.04939e-06	0	1.01267e-05	3.30737e-05	7.72559e-05	0.000501731	0.00170265	6.98027e-05	0.0320958	0.000202541	0.00768139	6.45312e-05	0.00130199	4.13317e-05
Viral_bacteria__Clostridium phage phiCT19406B Clostridium phage phiCT19406B_Unclassified__Clostridium phage phiCT19406B	2.09877e-06	3.83583e-05	2.02534e-05	6.61474e-05	7.72559e-05	0.000301039	0.00123829	6.6223e-05	0.000844974	0.000236298	0.000594288	2.43161e-05	0.000488245	0
Viral_bacteria__Clostridium phage phiCT19406C Clostridium phage phiCT19406C_Unclassified__Clostridium phage phiCT19406C	2.41359e-05	1.27861e-05	0	8.26843e-05	5.15039e-05	7.52596e-05	0.00541754	5.19045e-05	0.00105622	0.000303811	0.00498492	1.40285e-05	0.000863817	0
Viral_bacteria__Clostridium phage phiCT453A Clostridium phage phiCT453A_Unclassified__Clostridium phage phiCT453A	1.46914e-05	1.27861e-05	5.06334e-05	0.000137807	0.000412031	0.000852943	0.00626886	8.05415e-05	0.00687861	0.00104646	0.0018893	2.05752e-05	0.00797466	0.000454649
Viral_bacteria__Clostridium phage phiCT9441A Clostridium phage phiCT9441A_Unclassified__Clostridium phage phiCT9441A	1.57408e-06	0	0	3.30737e-05	0.000154512	2.50865e-05	0.000541754	3.57962e-05	0.043899	0.00140653	0.00639525	2.15104e-05	0.000300458	0
Viral_bacteria__Cyanophage KBS-S-2A Cyanophage KBS-S-2A_Unclassified__Cyanophage KBS-S-2A	1.04939e-06	0	0	1.10246e-05	0.000206016	0.000100346	0	2.32676e-05	9.2419e-05	0.000180036	0.000141919	3.55389e-05	6.25955e-05	0.000165327
Viral_bacteria__Cyanophage P-SSP2 Cyanophage P-SSP2_Unclassified__Cyanophage P-SSP2	0	0	0	5.51228e-06	5.15039e-05	0	0	3.57962e-06	0.000105622	0	1.77399e-05	0	0	0
Viral_bacteria__Cyanophage Syn30 Cyanophage Syn30_Unclassified__Cyanophage Syn30	2.62347e-06	0	3.03801e-05	5.51228e-05	0	2.50865e-05	0	1.78981e-06	5.28109e-05	1.12523e-05	0	9.35235e-07	1.25191e-05	0.000165327
Viral_bacteria__Deep-sea thermophilic phage D6E Deep-sea thermophilic phage D6E_Unclassified__Deep-sea thermophilic phage D6E	9.96917e-06	6.39304e-06	4.05067e-05	5.51228e-05	0.000206016	0.00875521	0.00147047	5.7274e-05	0.00753875	0.000416334	0.00147241	4.67617e-05	0.00539573	0.000227324
Viral_bacteria__Enterobacteria phage YYZ-2008 Enterobacteria phage YYZ-2008_Unclassified__Enterobacteria phage YYZ-2008	0.000186791	0	0.000111394	2.75614e-05	2.5752e-05	0.000100346	0	3.57962e-06	0.00014523	4.50091e-05	3.54799e-05	3.83446e-05	0.000175267	0.000206659
Viral_bacteria__Enterococcus phage EF62phi Enterococcus phage EF62phi_Unclassified__Enterococcus phage EF62phi	0.000772873	2.55722e-05	4.05067e-05	7.7172e-05	5.15039e-05	7.52596e-05	7.73934e-05	1.78981e-05	0.000382879	0.000483847	7.98297e-05	4.67617e-06	0.000175267	2.06659e-05
Viral_bacteria__Erwinia phage vB_EamM_Caitlin Erwinia phage vB_EamM_Caitlin_Unclassified__Erwinia phage vB_EamM_Caitlin	5.24693e-06	0	4.05067e-05	5.51228e-06	2.5752e-05	2.50865e-05	7.73934e-05	1.07389e-05	0.000382879	1.12523e-05	1.77399e-05	9.35235e-07	1.25191e-05	0
Viral_bacteria__Flavobacterium phage 1H Flavobacterium phage 1H_Unclassified__Flavobacterium phage 1H	0	0	0	2.20491e-05	5.15039e-05	0	7.73934e-05	1.78981e-06	0.000264054	1.12523e-05	1.77399e-05	0	2.50382e-05	0
Viral_bacteria__Flavobacterium phage 6H Flavobacterium phage 6H_Unclassified__Flavobacterium phage 6H	4.19754e-06	0	8.10135e-05	5.51228e-05	5.15039e-05	2.50865e-05	7.73934e-05	1.07389e-05	9.2419e-05	0.000585118	6.20898e-05	0	0.000187786	0
Viral_bacteria__Flavobacterium phage Fpv1 Flavobacterium phage Fpv1_Unclassified__Flavobacterium phage Fpv1	0	0	0	1.10246e-05	0	0	0.00023218	0	3.96081e-05	0.00104646	2.66099e-05	2.24456e-05	6.25955e-05	6.19976e-05
Viral_bacteria__Flavobacterium phage Fpv10 Flavobacterium phage Fpv10_Unclassified__Flavobacterium phage Fpv10	0	0	0	0	7.72559e-05	5.01731e-05	0.00603668	0.000320376	0.000475298	7.87659e-05	0.0273816	0.000410568	0.000312977	0
Viral_bacteria__Flavobacterium phage Fpv3 Flavobacterium phage Fpv3_Unclassified__Flavobacterium phage Fpv3	1.04939e-06	0	0	0	0	0	0.000541754	0	0	0	0	0	1.25191e-05	0
Viral_bacteria__Geobacillus phage GBSV1 Geobacillus phage GBSV1_Unclassified__Geobacillus phage GBSV1	0	0	0	1.65369e-05	7.72559e-05	0.0921178	0.00603668	0.000105599	0.00141269	0.00284682	0.00103779	4.67617e-06	0.0108541	0
Viral_bacteria__Geobacillus virus E2 Geobacillus virus E2_Unclassified__Geobacillus virus E2	0.0001275	0	1.01267e-05	0.000110246	0.000952822	0.000702423	0.000541754	7.15925e-05	0.000858176	0.000686388	0.000487848	0.000176759	0.0022284	4.13317e-05
Viral_bacteria__Idiomarinaceae phage 1N2-2 Idiomarinaceae phage 1N2-2_Unclassified__Idiomarinaceae phage 1N2-2	3.14816e-06	0	0	2.20491e-05	0	2.50865e-05	7.73934e-05	1.78981e-06	0.00209923	0.00010127	0.000310449	0	3.75573e-05	0
Viral_bacteria__Inoviridae Inoviridae_Unclassified__Enterobacteria phage If1	1.62655e-05	0	5.06334e-05	1.65369e-05	0.00012876	0	0	0	0.00014523	0	1.77399e-05	0	1.25191e-05	0
Viral_bacteria__Inoviridae Inoviridae_Unclassified__Ralstonia phage 1 NP-2014	1.57408e-06	0	0	5.51228e-06	0	0	0	0	2.64054e-05	0	0	0	0	0.000103329
Viral_bacteria__Inoviridae Inoviridae_Unclassified__Uncultured phage WW-nAnB strain 2	0	0	0	0	0	0	0	0	0	0.000157532	0	0	0	0
Viral_bacteria__Inoviridae Inoviridae_Unclassified__Vibrio phage CTX	0	0	0	0	0.000103008	0.000100346	0	0	0	0	0	0	3.75573e-05	0
Viral_bacteria__Lactobacillus prophage Lj771 Lactobacillus prophage Lj771_Unclassified__Lactobacillus johnsonii prophage Lj771	2.09877e-06	0	1.01267e-05	9.37088e-05	0.000154512	0.000100346	0.000928721	5.19045e-05	0.00118824	0.000562613	0.000833777	1.5899e-05	0.000650993	0
Viral_bacteria__Loktanella phage pCB2051-A Loktanella phage pCB2051-A_Unclassified__Loktanella phage pCB2051-A	4.72224e-06	0	3.03801e-05	4.40983e-05	0.000231768	2.50865e-05	0	1.78981e-06	9.2419e-05	0.000202541	3.54799e-05	0.000227262	0	4.13317e-05
Viral_bacteria__Marinomonas phage P12026 Marinomonas phage P12026_Unclassified__Marinomonas phage P12026	5.24693e-07	0	2.02534e-05	3.8586e-05	0.00025752	0.000526818	0.000154787	3.57962e-06	0.000171635	0.000180036	5.32198e-05	5.51789e-05	0.000312977	6.19976e-05
Viral_bacteria__Microviridae Microviridae_Unclassified__Chimpanzee faeces associated microphage 2	0	0	0	1.10246e-05	0	5.01731e-05	0.000154787	0	0.000250852	1.12523e-05	5.32198e-05	9.35235e-07	3.75573e-05	0
Viral_bacteria__Microviridae Microviridae_Unclassified__Microviridae IME-16	0	0	0	0	0	0	0	0	0	0	0	0	0.000100153	0
Viral_bacteria__Microviridae Microviridae_Unclassified__Microvirus CA82	0	0	0	0	0.000437783	0.00120415	7.73934e-05	0	0	0.000270054	0	2.33809e-05	0	0
Viral_bacteria__Microviridae Phix174microvirus__Enterobacteria phage phiX174 sensu lato	0	0	0	0	0.000489287	0.000827856	0.00046436	0	0	0	0	0	0	0
Viral_bacteria__Myoviridae Abouovirus__Brevibacillus virus Abouo	0	0	1.01267e-05	6.61474e-05	0	0.000752596	0.00247659	4.65351e-05	0.00307623	0.000720145	0.000851517	1.21581e-05	0.0133078	0
Viral_bacteria__Myoviridae Abouovirus__Brevibacillus virus Davies	0	0	0	5.51228e-06	0.00012876	0.000125433	0	1.78981e-06	2.64054e-05	0.000438838	0.000186269	4.86322e-05	0.000475725	0
Viral_bacteria__Myoviridae Agatevirus__Bacillus virus Agate	0	0	4.05067e-05	1.65369e-05	0.000231768	0.000401385	0.000851327	3.57962e-06	6.60136e-05	0.000236298	0.00012418	6.54664e-06	0.000388092	2.06659e-05
Viral_bacteria__Myoviridae Agatevirus__Bacillus virus Bobb	5.24693e-07	0	0	4.40983e-05	2.5752e-05	2.50865e-05	0.00023218	3.57962e-06	0.000171635	0.000787659	0.000541068	9.35235e-07	6.25955e-05	0.000165327
Viral_bacteria__Myoviridae Agrican357virus__Erwinia virus Ea35-70	1.52161e-05	0	5.06334e-05	1.65369e-05	0	0.000953289	0.000309574	5.36944e-06	0.000224446	0.000213793	0.000949086	2.89923e-05	0.000300458	0
Viral_bacteria__Myoviridae Ap22virus__Acinetobacter virus AbC62	5.24693e-07	0	1.01267e-05	1.10246e-05	0	0.000125433	0	5.36944e-06	5.28109e-05	0.000978947	0.00417775	9.35235e-07	0.00390596	0
Viral_bacteria__Myoviridae Arv1virus__Arthrobacter virus ArV1	0	0	1.01267e-05	1.10246e-05	2.5752e-05	0	0	3.57962e-06	0.000118824	1.12523e-05	8.86997e-06	8.41711e-06	0	0.000185993
Viral_bacteria__Myoviridae B4virus__Bacillus virus AvesoBmore	5.24693e-07	0	1.01267e-05	0	0.000386279	0.000602077	0.000154787	3.57962e-06	0.000132027	7.87659e-05	8.86997e-06	2.15104e-05	0.000187786	0
Viral_bacteria__Myoviridae B4virus__Bacillus virus Bigbertha	0	0	0	2.20491e-05	5.15039e-05	0	0	1.78981e-06	0.00256133	4.50091e-05	1.77399e-05	1.40285e-05	2.50382e-05	0
Viral_bacteria__Myoviridae B4virus__Bacillus virus Spock	0	0	0	0	2.5752e-05	0	0	5.36944e-06	0.000316865	3.37568e-05	0.000204009	9.35235e-07	1.25191e-05	0
Viral_bacteria__Myoviridae Bastillevirus__Bacillus virus Bastille	0	0	0	0	0	2.50865e-05	0.00023218	1.78981e-06	0.000105622	0	2.66099e-05	9.35235e-07	3.75573e-05	0
Viral_bacteria__Myoviridae Bastillevirus__Bacillus virus CAM003	0	0	0	2.75614e-05	0	0	0.000773934	1.25287e-05	0.000118824	2.25045e-05	8.86997e-05	9.35235e-07	0.000851298	0
Viral_bacteria__Myoviridae Bc431virus__Bacillus virus Bc431	5.24693e-07	0	0	1.65369e-05	5.15039e-05	0.000100346	0.00123829	5.36944e-06	0.00174276	0.000405082	0.000957956	7.48188e-06	0.00118931	2.06659e-05
Viral_bacteria__Myoviridae Bc431virus__Bacillus virus Bcp1	0	0	0	3.30737e-05	0.00012876	0	0.000851327	5.36944e-06	0.00579599	0.00105771	0.00010644	5.14379e-05	0.000538321	2.06659e-05
Viral_bacteria__Myoviridae Bc431virus__Bacillus virus BCP82	5.24693e-07	0	1.01267e-05	5.51228e-06	2.5752e-05	2.50865e-05	0.0046436	7.15925e-06	0.00178237	0.000866424	0.00109101	1.49638e-05	0.000350535	4.13317e-05
Viral_bacteria__Myoviridae Bc431virus__Bacillus virus Deepblue	0	6.39304e-06	0	2.20491e-05	2.5752e-05	0.000150519	0.00278616	7.15925e-06	6.60136e-05	0.000202541	6.20898e-05	4.67617e-06	0.000312977	0
Viral_bacteria__Myoviridae Bc431virus__Bacillus virus JBP901	0	0	0	1.10246e-05	0.00012876	2.50865e-05	7.73934e-05	1.78981e-06	0.00384199	0.000202541	9.75696e-05	4.11503e-05	0.00013771	0
Viral_bacteria__Myoviridae Bcep78virus__Burkholderia virus Bcep1	5.24693e-07	0	0	1.10246e-05	5.15039e-05	2.50865e-05	0.000154787	3.57962e-06	0.000514906	5.62613e-05	6.20898e-05	3.74094e-06	2.50382e-05	2.06659e-05
Viral_bacteria__Myoviridae Bcep78virus__Burkholderia virus Bcep43	0	0	0	5.51228e-06	0	0	0	7.15925e-06	0.000198041	0	8.86997e-06	0	0	0
Viral_bacteria__Myoviridae Bcepmuvirus__Burkholderia virus BcepMu	4.72224e-06	0	5.06334e-05	1.65369e-05	0.00012876	0.000175606	0.016717	1.96879e-05	0.000765757	0.000236298	6.20898e-05	1.68342e-05	0.000187786	0
Viral_bacteria__Myoviridae Bcepmuvirus__Burkholderia virus phiE255	1.57408e-06	0	3.03801e-05	5.51228e-05	0.000566543	0.000401385	0	1.61083e-05	0.000158433	0.000123775	0.00010644	2.71218e-05	0.000262901	0
Viral_bacteria__Myoviridae Biquartavirus__Aeromonas virus 44RR2	2.20371e-05	1.91791e-05	5.06334e-05	0.000198442	0.000283272	0.000351212	0.000773934	5.54842e-05	0.00151831	0.0034657	0.000487848	0.000120645	0.00122687	0.00024799
Viral_bacteria__Myoviridae Bxz1virus__Mycobacterium virus Alice	1.04939e-06	0	0	0	2.5752e-05	5.01731e-05	0	0	2.64054e-05	0.000191288	3.54799e-05	1.12228e-05	0.000150229	0
Viral_bacteria__Myoviridae Cc31virus__Enterobacter virus CC31	5.61422e-05	4.47513e-05	0.000222787	0.000143319	0.000334775	0	0	5.36944e-06	0	3.37568e-05	8.86997e-06	3.74094e-06	1.25191e-05	2.06659e-05
Viral_bacteria__Myoviridae Cd119virus__Clostridium phage phiCDHM11	0	0	0	4.40983e-05	0.00012876	0.000301039	0.00123829	3.04268e-05	0.00130707	0.00487223	0.000514458	2.8057e-06	0.000500764	2.06659e-05
Viral_bacteria__Myoviridae Cd119virus__Clostridium virus phiC2	1.83643e-05	6.39304e-06	2.02534e-05	0.000115758	2.5752e-05	0.000250865	0.00224441	0.000100229	0.0141665	0.000933938	0.00102892	0.000116904	0.00120183	6.19976e-05
Viral_bacteria__Myoviridae Cd119virus__Clostridium virus phiCD119	5.24693e-07	0	2.02534e-05	2.20491e-05	0.00012876	7.52596e-05	0.000309574	7.33823e-05	0.00179557	0.000315063	0.000470108	3.64742e-05	0.00120183	0
Viral_bacteria__Myoviridae Cd119virus__Clostridium virus phiCD27	2.09877e-06	0	1.01267e-05	1.65369e-05	0	0.000376298	0.000386967	1.25287e-05	0.00464736	0.000146279	0.000195139	2.89923e-05	0.000300458	0
Viral_bacteria__Myoviridae Cp220virus__Campylobacter virus CP220	5.24693e-07	0	0	1.65369e-05	5.15039e-05	0.000175606	0	0.00172538	1.32027e-05	0	0.00279404	5.61141e-06	0.00123939	0
Viral_bacteria__Myoviridae Cp220virus__Campylobacter virus CPt10	0	0	0	5.51228e-06	5.15039e-05	0	0	0	1.32027e-05	0.00010127	1.77399e-05	0	0.000125191	0
Viral_bacteria__Myoviridae Cp51virus__Bacillus virus CP51	8.91978e-06	0	4.05067e-05	6.61474e-05	0.000231768	0.000250865	0.000154787	2.8637e-05	0.000937393	0.000562613	0.000204009	1.87047e-05	0.000676031	0.000206659
Viral_bacteria__Myoviridae Cp51virus__Bacillus virus JL	8.91978e-06	0	3.03801e-05	4.40983e-05	5.15039e-05	0.000200692	0.00178005	8.94906e-06	0.000330068	0.000911433	0.000168529	3.46037e-05	0.000237863	4.13317e-05
Viral_bacteria__Myoviridae Cp8virus__Campylobacter phage PC14	0	0	2.02534e-05	1.65369e-05	2.5752e-05	0	0	1.78981e-06	3.96081e-05	3.37568e-05	8.86997e-06	9.35235e-07	0.000250382	2.06659e-05
Viral_bacteria__Myoviridae Cr3virus__Cronobacter virus CR3	3.14816e-06	0	1.01267e-05	6.06351e-05	5.15039e-05	0.000426471	0.00100611	5.36944e-06	0.0014655	9.00181e-05	0.000452368	0.000134674	0.000838779	0
Viral_bacteria__Myoviridae Cr3virus__Cronobacter virus CR8	5.24693e-07	0	2.02534e-05	1.65369e-05	2.5752e-05	7.52596e-05	0.00046436	0	7.92163e-05	2.25045e-05	2.66099e-05	3.1798e-05	0.000112672	4.13317e-05
Viral_bacteria__Myoviridae Cr3virus__Cronobacter virus CR9	2.62347e-06	0	1.01267e-05	1.10246e-05	2.5752e-05	7.52596e-05	0	0	0.000132027	7.87659e-05	1.77399e-05	2.15104e-05	0.000325496	0
Viral_bacteria__Myoviridae Cr3virus__Cronobacter virus PBES02	0	0	0	0	0	0	0.000154787	1.78981e-06	0	2.25045e-05	0	9.35235e-06	1.25191e-05	0
Viral_bacteria__Myoviridae Cr3virus__Pectobacterium virus phiTE	5.24693e-07	0	3.03801e-05	5.51228e-06	5.15039e-05	0.000602077	0.00108351	0	0.000132027	0.000258802	7.09597e-05	3.83446e-05	0.000187786	2.06659e-05
Viral_bacteria__Myoviridae Cvm10virus__Escherichia virus CVM10	0	0	0	5.51228e-06	0	0	0	0	0.000198041	1.12523e-05	5.32198e-05	1.87047e-06	3.75573e-05	2.06659e-05
Viral_bacteria__Myoviridae Felixo1virus__Erwinia virus Ea214	1.10186e-05	0	0	5.51228e-05	0.000231768	2.50865e-05	0.00023218	1.78981e-06	6.60136e-05	0.000191288	8.86997e-06	9.35235e-07	5.00764e-05	2.06659e-05
Viral_bacteria__Myoviridae Felixo1virus__Escherichia virus AYO145A	0.220317	0.316449	0.218412	0.206534	0.0395293	0.00664794	0.0126925	0.000347223	0.0112091	0.00397205	0.00204896	0.000101941	0.0062971	0.278865
Viral_bacteria__Myoviridae Felixo1virus__Escherichia virus EC6	0.0465781	0.075016	0.0514537	0.047582	0.00955398	0.00210727	0.00263138	6.08536e-05	0.00361754	0.000832668	0.000434628	2.33809e-05	0.00126443	0.0590217
Viral_bacteria__Myoviridae Felixo1virus__Escherichia virus HY02	0.0284761	0.0555044	0.0371649	0.0355212	0.00764833	0.00165571	0.00193483	3.04268e-05	0.00128066	0.000618875	0.000283839	2.05752e-05	0.000625955	0.0380252
Viral_bacteria__Myoviridae Felixo1virus__Escherichia virus JH2	0.0186833	0.0352576	0.0239901	0.0219609	0.00685002	0.00105364	0.00170265	4.11657e-05	0.000884582	0.000270054	0.000186269	1.49638e-05	0.000488245	0.0250883
Viral_bacteria__Myoviridae Felixo1virus__Escherichia virus VpaE1	0.0284908	0.0780591	0.0491549	0.0463032	0.00847239	0.0016808	0.00247659	5.01147e-05	0.0014655	0.000765154	0.000274969	1.40285e-05	0.000738626	0.0359793
Viral_bacteria__Myoviridae Felixo1virus__Escherichia virus wV8	0.0227717	0.0547756	0.034056	0.0334761	0.00278121	0.000175606	0.000696541	3.04268e-05	0.00108262	0.000461343	0.000319319	1.49638e-05	0.000538321	0.0305028
Viral_bacteria__Myoviridae Felixo1virus__Salmonella virus FelixO1	0.0193785	0.0423028	0.0279497	0.0244415	0.00422332	0.000852943	0.00170265	4.29555e-05	0.0014655	0.00034882	0.000230619	5.61141e-06	0.000538321	0.0214098
Viral_bacteria__Myoviridae Felixo1virus__Salmonella virus HB2014	0.00815373	0.0198824	0.0131343	0.0131744	0.00360527	0.000953289	0.00108351	1.25287e-05	0.000369676	0.000135027	0.00011531	1.87047e-06	0.000287939	0.0102709
Viral_bacteria__Myoviridae Felixo1virus__Salmonella virus UAB87	0.0204536	0.0438755	0.0293471	0.0241548	0.00551092	0.00120415	0.00193483	2.14777e-05	0.00182197	0.000472595	0.000186269	5.61141e-06	0.00041313	0.0272376
Viral_bacteria__Myoviridae Hapunavirus__Vibrio phage VP882	1.04939e-05	0	1.01267e-05	2.20491e-05	0.000206016	7.52596e-05	0.000154787	0	2.64054e-05	0.000180036	2.66099e-05	0	1.25191e-05	0
Viral_bacteria__Myoviridae Jd18virus__Klebsiella virus JD18	5.19446e-05	0.000115075	0.000202534	0.000159856	0	0	7.73934e-05	3.57962e-06	0.000607325	0.00010127	0.000133049	1.87047e-06	0.000162748	6.19976e-05
Viral_bacteria__Myoviridae Jimmervirus__Brevibacillus virus Osiris	0	0	2.02534e-05	2.75614e-05	0.000180264	0.000200692	0.00170265	1.61083e-05	0.00266695	0.000731397	0.0106085	1.5899e-05	0.00186534	0
Viral_bacteria__Myoviridae Js98virus__Escherichia virus Bp7	6.34879e-05	2.55722e-05	0.000141774	8.26843e-05	5.15039e-05	2.50865e-05	0	1.78981e-06	0	0	0	1.87047e-06	0	8.26634e-05
Viral_bacteria__Myoviridae Js98virus__Escherichia virus IME08	0.000124877	0.000274901	0.000749375	0.000297663	2.5752e-05	7.52596e-05	0.000851327	1.78981e-06	0	1.12523e-05	2.66099e-05	5.14379e-05	8.76336e-05	0.000185993
Viral_bacteria__Myoviridae Js98virus__Escherichia virus JS10	1.3642e-05	5.11444e-05	0.000141774	6.61474e-05	0	0	7.73934e-05	0	0	0	0	9.35235e-07	0	4.13317e-05
Viral_bacteria__Myoviridae Js98virus__Escherichia virus QL01	9.44448e-06	1.91791e-05	0.000192407	2.20491e-05	0	0	0	0	0	0	0	0	0	0
Viral_bacteria__Myoviridae Kayvirus__Staphylococcus phage 812	2.09877e-06	0	1.01267e-05	5.51228e-06	0.000721055	0	7.73934e-05	7.15925e-06	0.000264054	0.000337568	0.00208444	9.25883e-05	5.00764e-05	0.000103329
Viral_bacteria__Myoviridae Kayvirus__Staphylococcus virus G15	2.09877e-06	0	1.01267e-05	1.10246e-05	0.000206016	0	0	0	0.00077896	0	5.32198e-05	1.87047e-06	3.75573e-05	2.06659e-05
Viral_bacteria__Myoviridae Kayvirus__Staphylococcus virus MCE2014	0	0	0	0	0	7.52596e-05	0.00023218	0	9.2419e-05	0.00158657	0	1.40285e-05	0.000300458	0
Viral_bacteria__Myoviridae Kayvirus__Staphylococcus virus S253	0	0	0	0	0	0	0	0	0.000198041	0	0.000532198	0	0	0
Viral_bacteria__Myoviridae Kp15virus__Klebsiella virus KP15	1.3642e-05	1.27861e-05	3.03801e-05	3.8586e-05	0.00012876	0.000426471	7.73934e-05	3.57962e-06	0.000686541	0.000562613	0.000195139	5.61141e-05	0.00027542	0
Viral_bacteria__Myoviridae M12virus__Sinorhizobium virus M12	2.09877e-06	0	0	0	0	0	0.00023218	0	0.000105622	3.37568e-05	1.77399e-05	0	1.25191e-05	0
Viral_bacteria__Myoviridae Mooglevirus__Citrobacter phage Michonne	0.000571915	0.000837489	0.000759501	0.000606351	7.72559e-05	7.52596e-05	0.000154787	0	0.00410604	4.50091e-05	2.66099e-05	9.35235e-07	3.75573e-05	0.00101263
Viral_bacteria__Myoviridae Mooglevirus__Citrobacter virus Moogle	0.000557749	0.000652091	0.000496208	0.000413421	0	0	0	1.78981e-06	1.32027e-05	4.50091e-05	0	0	3.75573e-05	0.000702639
Viral_bacteria__Myoviridae Moonvirus__Citrobacter virus Merlin	3.88273e-05	6.39304e-06	0.000162027	4.96106e-05	0	5.01731e-05	0	0	1.32027e-05	9.00181e-05	1.77399e-05	0	8.76336e-05	2.06659e-05
Viral_bacteria__Myoviridae Msw3virus__Edwardsiella virus MSW3	1.04939e-06	0	0	0	0	0	0.00046436	8.94906e-06	0	1.12523e-05	0.00632429	0	1.25191e-05	0
Viral_bacteria__Myoviridae Msw3virus__Edwardsiella virus PEi21	0	0	0	0	0	0	7.73934e-05	3.57962e-05	2.64054e-05	0	0.0152297	0	2.50382e-05	0
Viral_bacteria__Myoviridae Muvirus__Escherichia phage D108	0.000756607	0	5.06334e-05	1.10246e-05	0	0	0.000386967	1.78981e-06	0.000105622	1.12523e-05	8.86997e-06	9.35235e-07	1.25191e-05	0.000103329
Viral_bacteria__Myoviridae Muvirus__Escherichia virus Mu	0.000313242	0	0	0	2.5752e-05	0	0	0	2.64054e-05	0	0	9.35235e-07	0	0
Viral_bacteria__Myoviridae Muvirus__Haemophilus phage SuMu	0	0	0	4.40983e-05	0.000103008	0	0.000386967	0	0.000316865	5.62613e-05	8.86997e-06	2.8057e-06	7.51145e-05	2.06659e-05
Viral_bacteria__Myoviridae Muvirus__Shigella virus SfMu	0.000426051	0	1.01267e-05	0	0	0	0	0	1.32027e-05	0	0	0	0	0
Viral_bacteria__Myoviridae Myoviridae_Unclassified__Acinetobacter phage LZ35	0	0	1.01267e-05	5.51228e-06	5.15039e-05	0	0	0	1.32027e-05	0.000123775	7.98297e-05	0	8.76336e-05	0
Viral_bacteria__Myoviridae Myoviridae_Unclassified__Acinetobacter phage phiAC-1	0	0	0	0	0	0	0	0	0.000224446	9.00181e-05	8.86997e-06	2.33809e-05	0.00460703	0
Viral_bacteria__Myoviridae Myoviridae_Unclassified__Acinetobacter phage vB_AbaM_Acibel004	5.24693e-07	0	2.02534e-05	0	0.000437783	5.01731e-05	7.73934e-05	0	0.000105622	6.75136e-05	0	9.35235e-07	0.000287939	0
Viral_bacteria__Myoviridae Myoviridae_Unclassified__Acinetobacter phage vB_AbaM_phiAbaA1	1.04939e-06	0	1.01267e-05	1.10246e-05	7.72559e-05	0.000200692	0.000154787	0	0.000224446	3.37568e-05	1.77399e-05	1.87047e-05	0.000100153	2.06659e-05
Viral_bacteria__Myoviridae Myoviridae_Unclassified__Acinetobacter phage YMC13/03/R2096	0	0	0	0	0	0	0.000154787	1.78981e-06	0.00063373	0.000416334	8.86997e-06	4.67617e-06	0	0
Viral_bacteria__Myoviridae Myoviridae_Unclassified__Aeromonas phage vB_AsaM-56	0	0	0	0	0	0	0	0	0.000277257	0.00010127	2.66099e-05	9.35235e-07	0	2.06659e-05
Viral_bacteria__Myoviridae Myoviridae_Unclassified__Aggregatibacter phage S1249	1.20679e-05	0	4.05067e-05	3.30737e-05	7.72559e-05	0.000351212	0.00023218	1.43185e-05	0.000277257	0.000517604	0.000558808	4.67617e-06	0.000175267	0.000185993
Viral_bacteria__Myoviridae Myoviridae_Unclassified__Agrobacterium phage 7-7-1	0	0	0	0	2.5752e-05	0	0.00046436	1.78981e-06	1.32027e-05	0	0	0	0.000112672	0
Viral_bacteria__Myoviridae Myoviridae_Unclassified__Bacillus phage 0305phi8-36	2.30865e-05	6.39304e-06	0.00018228	0.00038586	0.00092707	0.000978375	0.00147047	6.98027e-05	0.0019672	0.00366824	0.000816037	0.000125321	0.00191542	0.000867966
Viral_bacteria__Myoviridae Myoviridae_Unclassified__Bacillus phage AR9	6.82101e-06	0	6.07601e-05	0.000275614	0.000721055	0.00148011	0.00147047	7.15925e-05	0.00410604	0.00444464	0.000886997	4.20856e-05	0.00284183	0.000309988
Viral_bacteria__Myoviridae Myoviridae_Unclassified__Bacillus phage BCD7	5.77162e-06	1.27861e-05	0.000101267	0.00012127	0.000566543	0.00065225	0.0390063	1.96879e-05	0.00161073	0.00204791	0.000425758	0.00218284	0.00294199	0.00035132
Viral_bacteria__Myoviridae Myoviridae_Unclassified__Bacillus phage Belinda	0	0	0	1.10246e-05	0.000180264	7.52596e-05	0.00417924	0	6.60136e-05	1.12523e-05	1.77399e-05	2.33809e-05	2.50382e-05	0
Viral_bacteria__Myoviridae Myoviridae_Unclassified__Bacillus phage BM5	5.24693e-07	6.39304e-06	2.02534e-05	3.8586e-05	0.000360527	0.130927	0.00270877	0.000533364	0.00406644	0.0321477	0.00354799	3.74094e-05	0.0216956	4.13317e-05
Viral_bacteria__Myoviridae Myoviridae_Unclassified__Bacillus phage BPS10C	0	0	1.01267e-05	0	0	0	7.73934e-05	0	0.00118824	3.37568e-05	0	9.35235e-07	0	0
Viral_bacteria__Myoviridae Myoviridae_Unclassified__Bacillus phage DIGNKC	0	0	0	0	0	0	0	0	0.000343271	1.12523e-05	0	0	0	0
Viral_bacteria__Myoviridae Myoviridae_Unclassified__Bacillus phage DirtyBetty	0	0	0	0	0	0	0.00023218	0	6.60136e-05	1.12523e-05	0	0	0	0
Viral_bacteria__Myoviridae Myoviridae_Unclassified__Bacillus phage Eldridge	3.14816e-06	0	0	0.000115758	0.000463535	0.000451558	7.73934e-05	2.50574e-05	0.00221806	0.00227296	0.000789427	7.10779e-05	0.00103908	2.06659e-05
Viral_bacteria__Myoviridae Myoviridae_Unclassified__Bacillus phage G	0.000133272	0.00023015	0.00141774	0.00226004	0.00703028	0.0116402	0.00549493	0.000533364	0.0251644	0.0245975	0.0115221	0.000863222	0.0136583	0.00727438
Viral_bacteria__Myoviridae Myoviridae_Unclassified__Bacillus phage Hoody T	0	0	0	5.51228e-06	0	0	0.00108351	0	5.28109e-05	0	0	0	5.00764e-05	0
Viral_bacteria__Myoviridae Myoviridae_Unclassified__Bacillus phage Mater	4.19754e-06	0	1.01267e-05	7.16597e-05	0.000180264	0.000576991	0.00046436	1.78981e-05	0.000237649	0.000765154	0.000399148	2.61866e-05	0.000625955	0.000103329
Viral_bacteria__Myoviridae Myoviridae_Unclassified__Bacillus phage Moonbeam	2.09877e-06	0	2.02534e-05	3.8586e-05	7.72559e-05	5.01731e-05	0.00549493	2.50574e-05	0.000382879	0.000607622	0.00208444	6.54664e-06	0.000262901	2.06659e-05
Viral_bacteria__Myoviridae Myoviridae_Unclassified__Bacillus phage Nemo	0	0	0	5.51228e-06	0	0	0	0	0.000132027	0	0	0	0	0
Viral_bacteria__Myoviridae Myoviridae_Unclassified__Bacillus phage NotTheCreek	0	0	0	0	0	0	0	0	0.000343271	0	0	0	0	0
Viral_bacteria__Myoviridae Myoviridae_Unclassified__Bacillus phage Phrodo	0	0	0	0	0	0	0	0	1.32027e-05	0.00010127	0	9.35235e-07	8.76336e-05	0
Viral_bacteria__Myoviridae Myoviridae_Unclassified__Bacillus phage Shbh1	0	0	8.10135e-05	4.96106e-05	0.000103008	5.01731e-05	0.000619147	1.43185e-05	0.000105622	0.00184537	4.43498e-05	7.48188e-06	0.000363054	6.19976e-05
Viral_bacteria__Myoviridae Myoviridae_Unclassified__Bacillus phage SP10	8.39509e-06	6.39304e-06	3.03801e-05	9.37088e-05	0.000231768	0.000326125	0.00294095	1.07389e-05	0.000356473	0.000731397	0.00108214	1.12228e-05	0.000663512	8.26634e-05
Viral_bacteria__Myoviridae Myoviridae_Unclassified__Bacillus phage SP-15	3.20063e-05	6.39304e-06	0.000556968	0.000518155	0.00139061	0.00183132	0.000928721	5.54842e-05	0.00180877	0.00176661	0.000505588	0.000146832	0.00215328	0.00109529
Viral_bacteria__Myoviridae Myoviridae_Unclassified__Bdellovibrio phage phi1422	0	0	0	0	0	0	0	0	7.92163e-05	0	0.000345929	0	0	0
Viral_bacteria__Myoviridae Myoviridae_Unclassified__Brevibacillus phage Jimmer1	5.24693e-07	0	0	3.30737e-05	0.000206016	0.000426471	0.00046436	1.43185e-05	0.000171635	0.000742649	0.000461238	2.52513e-05	0.00732367	4.13317e-05
Viral_bacteria__Myoviridae Myoviridae_Unclassified__Brochothrix phage A9	7.3457e-06	2.55722e-05	3.03801e-05	3.8586e-05	0.00190564	5.01731e-05	0	5.36944e-06	0.00765757	0.000303811	4.43498e-05	0.000159925	8.76336e-05	0.000619976
Viral_bacteria__Myoviridae Myoviridae_Unclassified__Burkholderia phage BcepB1A	0	0	0	0	0.000283272	0	0	1.78981e-06	3.96081e-05	0.000765154	0	0.000268412	1.25191e-05	0
Viral_bacteria__Myoviridae Myoviridae_Unclassified__Caulobacter phage Cr30	4.72224e-06	2.55722e-05	6.07601e-05	0.000104733	2.5752e-05	0.000100346	7.73934e-05	1.07389e-05	0.00029046	0.000157532	9.75696e-05	1.87047e-06	0.000287939	0.00024799
Viral_bacteria__Myoviridae Myoviridae_Unclassified__Cellulophaga phage phiSM	1.57408e-06	0	4.05067e-05	2.20491e-05	2.5752e-05	0	7.73934e-05	0	0.00014523	5.62613e-05	0	9.35235e-07	2.50382e-05	2.06659e-05
Viral_bacteria__Myoviridae Myoviridae_Unclassified__Clostridium phage CDMH1	3.14816e-06	0	1.01267e-05	4.40983e-05	2.5752e-05	0.000100346	0.000696541	4.83249e-05	0.0131631	0.000416334	0.00406244	2.61866e-05	0.000450687	0
Viral_bacteria__Myoviridae Myoviridae_Unclassified__Clostridium phage c-st	6.29632e-06	1.27861e-05	0.000111394	0.000181905	0.0032705	0.00323616	0.00270877	6.44332e-05	0.0278577	0.00561488	0.00612915	0.000961422	0.00517038	0.000227324
Viral_bacteria__Myoviridae Myoviridae_Unclassified__Clostridium phage phiCD211	1.46914e-05	1.27861e-05	0.000172154	0.000347274	0.00272971	0.00356229	0.00626886	0.000116338	0.00868739	0.00849546	0.00142806	0.000400281	0.106362	0.000268656
Viral_bacteria__Myoviridae Myoviridae_Unclassified__Clostridium phage phiCD481-1	2.09877e-06	0	1.01267e-05	1.10246e-05	0.00012876	0	0.000154787	2.32676e-05	0.000264054	3.37568e-05	0.000133049	0	0.000150229	0
Viral_bacteria__Myoviridae Myoviridae_Unclassified__Clostridium phage phiCD505	1.04939e-05	0	0	6.61474e-05	0.000154512	2.50865e-05	0.000851327	1.78981e-05	0.00092419	0.000146279	0.000186269	2.8057e-06	0.000125191	0
Viral_bacteria__Myoviridae Myoviridae_Unclassified__Clostridium phage phiCD506	0	0	0	1.10246e-05	0	0	0	0	1.32027e-05	5.62613e-05	8.86997e-06	2.33809e-05	0.000112672	0
Viral_bacteria__Myoviridae Myoviridae_Unclassified__Clostridium phage phiCDHM19	0	0	1.01267e-05	1.10246e-05	0.000103008	5.01731e-05	0.0011609	8.94906e-06	0.00138629	0.000258802	0.00010644	1.87047e-05	0.000212825	0
Viral_bacteria__Myoviridae Myoviridae_Unclassified__Clostridium phage phiMMP01	5.24693e-07	0	0	1.10246e-05	0	7.52596e-05	0.00510796	7.15925e-06	0.00124106	5.62613e-05	0.000328189	8.41711e-06	0.000338015	6.19976e-05
Viral_bacteria__Myoviridae Myoviridae_Unclassified__Clostridium phage phiMMP02	0	0	0	5.51228e-06	5.15039e-05	0	0	7.15925e-06	0.000462095	1.12523e-05	4.43498e-05	7.48188e-06	8.76336e-05	0
Viral_bacteria__Myoviridae Myoviridae_Unclassified__Clostridium phage phiMMP03	0	0	0	0	5.15039e-05	7.52596e-05	0	0	0.000224446	0.000123775	5.32198e-05	0	0	0
Viral_bacteria__Myoviridae Myoviridae_Unclassified__Clostridium phage phiMMP04	0	0	1.01267e-05	2.20491e-05	7.72559e-05	5.01731e-05	7.73934e-05	1.43185e-05	0.000158433	0.00199165	5.32198e-05	9.35235e-07	0.000212825	0
Viral_bacteria__Myoviridae Myoviridae_Unclassified__Cronobacter phage CR5	1.31173e-05	0	1.01267e-05	2.20491e-05	0	0.000100346	0.000154787	1.07389e-05	0.000343271	9.00181e-05	7.98297e-05	0	0.000100153	0.000371985
Viral_bacteria__Myoviridae Myoviridae_Unclassified__Cronobacter phage ENT47670	3.14816e-06	0	5.06334e-05	2.20491e-05	0	0	7.73934e-05	3.57962e-06	2.64054e-05	0.000191288	1.77399e-05	9.35235e-07	3.75573e-05	0.000144661
Viral_bacteria__Myoviridae Myoviridae_Unclassified__Cronobacter phage S13	5.77162e-06	0	4.05067e-05	9.37088e-05	5.15039e-05	0.000150519	0.0011609	4.47453e-05	0.00920229	0.00542359	0.000301579	9.35235e-06	0.000338015	4.13317e-05
Viral_bacteria__Myoviridae Myoviridae_Unclassified__Cronobacter phage vB_CsaM_GAP32	5.61422e-05	3.83583e-05	0.000668361	0.000832355	0.00285847	0.00471627	0.00263138	0.000184351	0.0227879	0.00714519	0.00270534	0.000445172	0.00415634	0.00252123
Viral_bacteria__Myoviridae Myoviridae_Unclassified__Cyanophage MED4-213	4.04014e-05	5.11444e-05	0.000232914	0.000159856	0.000154512	5.01731e-05	0.000696541	5.19045e-05	0.00114864	0.000438838	0.000762817	2.8057e-06	0.000475725	0.0016946
Viral_bacteria__Myoviridae Myoviridae_Unclassified__Cyanophage P-RSM6	1.04939e-06	0	1.01267e-05	2.20491e-05	0	0	0	3.57962e-06	0.000237649	1.12523e-05	6.20898e-05	9.35235e-07	0	2.06659e-05
Viral_bacteria__Myoviridae Myoviridae_Unclassified__Cyanophage S-SSM4	3.14816e-06	0	8.10135e-05	3.8586e-05	0	2.50865e-05	7.73934e-05	1.78981e-06	3.96081e-05	1.12523e-05	5.32198e-05	2.8057e-06	2.50382e-05	0.000206659
Viral_bacteria__Myoviridae Myoviridae_Unclassified__Cyanophage S-TIM5	4.19754e-06	0	3.03801e-05	2.75614e-05	0	0	7.73934e-05	3.57962e-06	6.60136e-05	1.12523e-05	2.66099e-05	1.87047e-06	1.25191e-05	0.000268656
Viral_bacteria__Myoviridae Myoviridae_Unclassified__Deftia phage phiW-14	0	0	0	1.10246e-05	0	5.01731e-05	0	3.57962e-06	0	0.000270054	0	0	8.76336e-05	2.06659e-05
Viral_bacteria__Myoviridae Myoviridae_Unclassified__Edwardsiella phage FW-3	4.72224e-06	0	2.02534e-05	5.51228e-06	5.15039e-05	0	0.0157109	3.57962e-06	0.00166354	0.000416334	7.09597e-05	9.35235e-07	0.000175267	0
Viral_bacteria__Myoviridae Myoviridae_Unclassified__Edwardsiella phage PEi20	2.62347e-06	1.27861e-05	5.06334e-05	1.65369e-05	0	2.50865e-05	0	0	0	1.12523e-05	8.86997e-06	0	3.75573e-05	0.000103329
Viral_bacteria__Myoviridae Myoviridae_Unclassified__Enterobacter phage Arya	1.04939e-06	0	0	5.51228e-06	2.5752e-05	0	0	0	0	2.25045e-05	1.77399e-05	7.48188e-06	0.000250382	0
Viral_bacteria__Myoviridae Myoviridae_Unclassified__Enterobacteria phage P88	0.000440742	0	3.03801e-05	1.10246e-05	2.5752e-05	2.50865e-05	0	3.57962e-06	0.00014523	3.37568e-05	6.20898e-05	0	2.50382e-05	0.000144661
Viral_bacteria__Myoviridae Myoviridae_Unclassified__Enterobacteria phage phi92	3.88273e-05	1.91791e-05	0.000384814	0.000523667	0.000180264	0.000526818	0.00108351	0.000100229	0.00426448	0.000967695	0.00222636	8.41711e-05	0.00195298	0.000681973
Viral_bacteria__Myoviridae Myoviridae_Unclassified__Enterobacteria phage phiEcoM-GJ1	1.15432e-05	0	2.02534e-05	5.51228e-06	2.5752e-05	0	0.00023218	0	3.96081e-05	0.000123775	0	0	0	0
Viral_bacteria__Myoviridae Myoviridae_Unclassified__Enterobacteria phage phiP27	0.000217223	0	2.02534e-05	3.30737e-05	0	0	0.000309574	5.36944e-06	0.000580919	5.62613e-05	0.000452368	1.87047e-06	5.00764e-05	4.13317e-05
Viral_bacteria__Myoviridae Myoviridae_Unclassified__Enterobacteria phage SfI	6.45373e-05	0	7.08868e-05	6.06351e-05	2.5752e-05	0	0	5.36944e-06	0.000224446	7.87659e-05	5.32198e-05	3.74094e-06	8.76336e-05	0.000144661
Viral_bacteria__Myoviridae Myoviridae_Unclassified__Enterobacteria phage SfV	3.41051e-05	0	2.02534e-05	0	0	5.01731e-05	0	5.36944e-06	0.000198041	2.25045e-05	2.66099e-05	0	5.00764e-05	4.13317e-05
Viral_bacteria__Myoviridae Myoviridae_Unclassified__Enterobacteria phage vB_KleM-RaK2	1.73149e-05	1.27861e-05	0.00012152	0.000281126	0.000978574	0.00137976	0.00154787	5.54842e-05	0.00233688	0.00274555	0.000656378	0.000118775	0.00156489	0.000950629
Viral_bacteria__Myoviridae Myoviridae_Unclassified__Enterococcus phage ECP3	4.30248e-05	6.39304e-06	4.05067e-05	4.96106e-05	0.000231768	0.000100346	0.00603668	5.36944e-06	0.00312904	7.87659e-05	0.000301579	2.43161e-05	0.000200305	0.00138461
Viral_bacteria__Myoviridae Myoviridae_Unclassified__Enterococcus phage EFDG1	1.3642e-05	6.39304e-06	0.00018228	0.000297663	5.15039e-05	0.000627164	0.000928721	1.61083e-05	0.00287819	0.00136152	0.000133049	2.05752e-05	0.00116428	0.0016946
Viral_bacteria__Myoviridae Myoviridae_Unclassified__Enterococcus phage EFLK1	1.57408e-06	0	0	0	0	0	0	0	0.000118824	0	1.77399e-05	0	0	0
Viral_bacteria__Myoviridae Myoviridae_Unclassified__Enterococcus phage phiEF24C	5.24693e-06	0	4.05067e-05	2.20491e-05	0	0	0	1.78981e-06	1.32027e-05	0	0	0	0	0.00024799
Viral_bacteria__Myoviridae Myoviridae_Unclassified__Erwinia phage phiEa2809	0	0	1.01267e-05	0	0	0	7.73934e-05	0	0.00398722	0	0	9.35235e-07	1.25191e-05	2.06659e-05
Viral_bacteria__Myoviridae Myoviridae_Unclassified__Erwinia phage vB_EamM_EarlPhillipIV	8.91978e-06	0	3.03801e-05	5.51228e-06	0	0	0	1.25287e-05	0.000277257	6.75136e-05	3.54799e-05	9.35235e-07	3.75573e-05	0.000206659
Viral_bacteria__Myoviridae Myoviridae_Unclassified__Erwinia phage vB_EamM_Huxley	3.67285e-06	0	2.02534e-05	5.51228e-06	0	2.50865e-05	0	0	0.000118824	2.25045e-05	2.66099e-05	0	0.000125191	0.000165327
Viral_bacteria__Myoviridae Myoviridae_Unclassified__Erwinia phage vB_EamM_Kwan	2.62347e-06	0	2.02534e-05	1.10246e-05	5.15039e-05	7.52596e-05	0	3.57962e-06	0.000132027	6.75136e-05	0.00012418	0	1.25191e-05	0.000103329
Viral_bacteria__Myoviridae Myoviridae_Unclassified__Erwinia phage vB_EamM_Phobos	2.62347e-06	6.39304e-06	0	3.30737e-05	0	0.000100346	0	7.15925e-06	0.000132027	3.37568e-05	4.43498e-05	9.35235e-07	0.000125191	2.06659e-05
Viral_bacteria__Myoviridae Myoviridae_Unclassified__Erwinia phage vB_EamM-Y2	0	0	0	0	2.5752e-05	0	0.00278616	1.07389e-05	0.000118824	0.000281307	1.77399e-05	9.35235e-07	0	2.06659e-05
Viral_bacteria__Myoviridae Myoviridae_Unclassified__Escherichia phage 121Q	1.15432e-05	1.27861e-05	0.000111394	0.000187418	0.000386279	0.000852943	0.000619147	3.7586e-05	0.00092419	0.00167659	0.00113536	3.83446e-05	0.00096397	0.000289322
Viral_bacteria__Myoviridae Myoviridae_Unclassified__Escherichia phage APCEc01	0.000776021	0.00132336	0.00616715	0.0036326	0	0	0.00023218	7.15925e-06	0.000132027	6.75136e-05	1.77399e-05	9.35235e-07	8.76336e-05	0.000867966
Viral_bacteria__Myoviridae Myoviridae_Unclassified__Escherichia phage Av-05	4.19754e-06	0	3.03801e-05	1.10246e-05	0.000103008	0	0.00325052	0	0.000422487	0.000112523	0	9.35235e-07	3.75573e-05	6.19976e-05
Viral_bacteria__Myoviridae Myoviridae_Unclassified__Escherichia phage ECML-117	1.04939e-06	0	2.02534e-05	0	7.72559e-05	2.50865e-05	0.000154787	0	2.64054e-05	0.000551361	2.66099e-05	2.61866e-05	2.50382e-05	2.06659e-05
Viral_bacteria__Myoviridae Myoviridae_Unclassified__Escherichia phage HY01	0.010561	0.0293824	0.132153	0.0509831	0.000283272	0.000376298	0.000309574	3.40064e-05	0.00149191	0.000382577	0.000319319	8.41711e-06	0.000300458	0.00936163
Viral_bacteria__Myoviridae Myoviridae_Unclassified__Escherichia phage HY03	0.00276198	0.0100818	0.0450941	0.0151147	0.000231768	0.000125433	0	5.36944e-06	0.000303662	0.000157532	6.20898e-05	8.41711e-06	5.00764e-05	0.00229391
Viral_bacteria__Myoviridae Myoviridae_Unclassified__Escherichia phage phAPEC8	1.67902e-05	1.91791e-05	0.00012152	0.000242541	0.000103008	0.000225779	0.00046436	3.40064e-05	0.00175596	0.000281307	0.000195139	4.67617e-06	0.00102657	0.000640641
Viral_bacteria__Myoviridae Myoviridae_Unclassified__Escherichia phage slur16	2.62347e-06	6.39304e-06	1.01267e-05	3.8586e-05	7.72559e-05	2.50865e-05	0.000154787	7.15925e-06	0.00227087	0.000191288	0.000177399	2.8057e-06	5.00764e-05	6.19976e-05
Viral_bacteria__Myoviridae Myoviridae_Unclassified__Escherichia phage UFV-AREG1	0.00181544	0.00728168	0.029256	0.0100213	7.72559e-05	5.01731e-05	0	3.57962e-06	0.00014523	0.00010127	0	0	6.25955e-05	0.00142594
Viral_bacteria__Myoviridae Myoviridae_Unclassified__Escherichia phage vB_EcoM_Alf5	0.0133587	0.0327516	0.0202534	0.0209963	0.00329625	0.000852943	0.00154787	1.25287e-05	0.000765757	0.000236298	7.09597e-05	8.41711e-06	0.000363054	0.0171527
Viral_bacteria__Myoviridae Myoviridae_Unclassified__Escherichia phage vB_EcoM-UFV13	0.00188942	0.00577931	0.0260053	0.00598634	0.00012876	0.000100346	7.73934e-05	8.94906e-06	0.000211243	0.000135027	2.66099e-05	1.49638e-05	0.000100153	0.0017566
Viral_bacteria__Myoviridae Myoviridae_Unclassified__Flavobacterium phage FCL-2	2.62347e-06	0	1.01267e-05	0	0	0	0	1.07389e-05	0.000264054	3.37568e-05	3.54799e-05	6.54664e-06	2.50382e-05	0
Viral_bacteria__Myoviridae Myoviridae_Unclassified__Haemophilus phage Aaphi23	2.62347e-06	0	0	5.51228e-06	0	7.52596e-05	0.000309574	0	0	0	3.54799e-05	0	1.25191e-05	0
Viral_bacteria__Myoviridae Myoviridae_Unclassified__Halocynthia phage JM-2012	0	1.27861e-05	0	1.10246e-05	7.72559e-05	0	0.00023218	1.25287e-05	9.2419e-05	0.000112523	4.43498e-05	1.87047e-06	8.76336e-05	4.13317e-05
Viral_bacteria__Myoviridae Myoviridae_Unclassified__Iodobacteriophage phiPLPE	2.62347e-06	0	0	5.51228e-06	0	2.50865e-05	0	1.78981e-06	0.00212564	1.12523e-05	0	0	2.50382e-05	2.06659e-05
Viral_bacteria__Myoviridae Myoviridae_Unclassified__Klebsiella phage 0507-KN2-1	0	0	0	5.51228e-06	0	0	0.000928721	0	0.00773679	2.25045e-05	0.000798297	9.35235e-07	5.00764e-05	2.06659e-05
Viral_bacteria__Myoviridae Myoviridae_Unclassified__Klebsiella phage JD001	0	0	0	0	0	0	7.73934e-05	0	0.0019276	0	0	0.000122516	7.51145e-05	2.06659e-05
Viral_bacteria__Myoviridae Myoviridae_Unclassified__Klebsiella phage vB_KpnM_KB57	3.67285e-06	0	0	3.30737e-05	5.15039e-05	0	0.000154787	0	0.00207283	3.37568e-05	0.000478978	8.41711e-06	3.75573e-05	0
Viral_bacteria__Myoviridae Myoviridae_Unclassified__Lactobacillus phage AQ113	5.24693e-06	6.39304e-06	1.01267e-05	0.000154344	7.72559e-05	0.000200692	0.00139308	2.68472e-05	0.00113543	0.00196915	0.00250133	2.8057e-06	0.00106412	0.000929963
Viral_bacteria__Myoviridae Myoviridae_Unclassified__Lactobacillus phage KC5a	0	0	0	1.65369e-05	5.15039e-05	0	0	7.15925e-06	0.000132027	6.75136e-05	4.43498e-05	9.35235e-06	0.000162748	2.06659e-05
Viral_bacteria__Myoviridae Myoviridae_Unclassified__Lactobacillus phage Lb338-1	1.04939e-06	0	6.07601e-05	8.26843e-05	0.00025752	0	7.73934e-05	1.43185e-05	0.000158433	9.00181e-05	0.000567678	4.3956e-05	3.75573e-05	0.000227324
Viral_bacteria__Myoviridae Myoviridae_Unclassified__Lactobacillus phage LBR48	0.0114131	0	1.01267e-05	3.8586e-05	2.5752e-05	7.52596e-05	0	7.15925e-06	0.000118824	0.000360072	0.000230619	2.8057e-06	0.000212825	8.26634e-05
Viral_bacteria__Myoviridae Myoviridae_Unclassified__Lactobacillus phage LfeInf	0	0	6.07601e-05	5.51228e-05	0.00012876	0.000275952	7.73934e-05	2.32676e-05	0.000118824	1.12523e-05	0.00300692	0	0.000175267	8.26634e-05
Viral_bacteria__Myoviridae Myoviridae_Unclassified__Lactobacillus phage LP65	1.04939e-06	0	6.07601e-05	0.000137807	0.000180264	0.000928202	0.000154787	1.25287e-05	0.000977001	0.000641379	0.00195139	2.89923e-05	0.000162748	0.000785302
Viral_bacteria__Myoviridae Myoviridae_Unclassified__Lactobacillus phage phi jlb1	1.04939e-06	0	0	2.20491e-05	5.15039e-05	7.52596e-05	0	7.15925e-06	9.2419e-05	0.000213793	0.000248359	1.77695e-05	0.000212825	2.06659e-05
Viral_bacteria__Myoviridae Myoviridae_Unclassified__Listeria phage List-36	1.57408e-06	0	0	3.30737e-05	5.15039e-05	0	0.000619147	1.25287e-05	0.00578279	7.87659e-05	0.000212879	6.54664e-06	0.000162748	2.06659e-05
Viral_bacteria__Myoviridae Myoviridae_Unclassified__Listeria phage LMSP-25	0	0	0	5.51228e-06	0	0	7.73934e-05	0	0.000277257	0	6.20898e-05	0	0.000100153	0
Viral_bacteria__Myoviridae Myoviridae_Unclassified__Listeria phage LMTA-148	0	0	0	1.65369e-05	0	0	0.000154787	0	6.60136e-05	0	0	9.35235e-07	0	0
Viral_bacteria__Myoviridae Myoviridae_Unclassified__Microcystis aeruginosa phage Ma-LMM01	3.67285e-06	3.19652e-05	0	0.000115758	0	0	0	3.57962e-06	0.00153151	6.75136e-05	0.000647508	3.74094e-06	8.76336e-05	8.26634e-05
Viral_bacteria__Myoviridae Myoviridae_Unclassified__Microcystis phage MaMV-DC	3.67285e-06	1.91791e-05	6.07601e-05	3.30737e-05	0	0	7.73934e-05	1.78981e-06	9.2419e-05	2.25045e-05	0.000558808	9.35235e-07	7.51145e-05	0
Viral_bacteria__Myoviridae Myoviridae_Unclassified__Morganella phage vB_MmoM_MP1	5.77162e-06	0	1.01267e-05	1.65369e-05	2.5752e-05	2.50865e-05	0	5.36944e-06	2.64054e-05	0.000450091	5.32198e-05	8.41711e-06	6.25955e-05	6.19976e-05
Viral_bacteria__Myoviridae Myoviridae_Unclassified__Mycobacterium phage Myrna	1.31173e-05	0	8.10135e-05	0.000126783	2.5752e-05	2.50865e-05	0.000309574	8.94906e-06	0.000264054	0.000112523	9.75696e-05	9.35235e-07	0.000200305	0.00115729
Viral_bacteria__Myoviridae Myoviridae_Unclassified__Mycobacterium phage Tonenili	1.57408e-06	0	5.06334e-05	3.30737e-05	5.15039e-05	0	7.73934e-05	8.94906e-06	2.64054e-05	0.000112523	2.66099e-05	0	0.000150229	0.000185993
Viral_bacteria__Myoviridae Myoviridae_Unclassified__Pectobacterium phage ZF40	9.96917e-06	0	2.02534e-05	1.10246e-05	2.5752e-05	0.000150519	0.00294095	1.78981e-06	1.32027e-05	0.000731397	0.00799184	3.74094e-06	0.0121811	0
Viral_bacteria__Myoviridae Myoviridae_Unclassified__Prochlorococcus phage P-HM1	7.8704e-06	6.39304e-06	0.00012152	8.26843e-05	0.000103008	5.01731e-05	0.000696541	2.32676e-05	0.000369676	0.00010127	0.000141919	1.87047e-06	0.00013771	0.000103329
Viral_bacteria__Myoviridae Myoviridae_Unclassified__Prochlorococcus phage P-HM2	9.96917e-06	6.39304e-06	4.05067e-05	6.61474e-05	2.5752e-05	0	0	1.78981e-06	0.000237649	9.00181e-05	2.66099e-05	9.35235e-07	6.25955e-05	0.00035132
Viral_bacteria__Myoviridae Myoviridae_Unclassified__Prochlorococcus phage P-RSM4	5.24693e-07	0	0	0	0	0	0	0	0.000171635	0	3.54799e-05	0	0	0
Viral_bacteria__Myoviridae Myoviridae_Unclassified__Prochlorococcus phage P-SSM3	0	0	0	0	0	0	0	0	0.000211243	2.25045e-05	0	0	0	0
Viral_bacteria__Myoviridae Myoviridae_Unclassified__Prochlorococcus phage P-SSM7	8.91978e-06	0	7.08868e-05	8.81965e-05	5.15039e-05	2.50865e-05	0.000309574	1.25287e-05	0.000356473	0.000157532	0.000390279	5.61141e-06	8.76336e-05	0.000619976
Viral_bacteria__Myoviridae Myoviridae_Unclassified__Prochlorococcus phage P-TIM68	1.3642e-05	6.39304e-06	2.02534e-05	1.10246e-05	0.000103008	0	0	3.57962e-06	0.000211243	2.25045e-05	3.54799e-05	2.8057e-06	2.50382e-05	0.000578644
Viral_bacteria__Myoviridae Myoviridae_Unclassified__Pseudoalteromonas phage H101	1.04939e-06	0	0	0	2.5752e-05	2.50865e-05	7.73934e-05	1.78981e-06	0.000475298	0.000202541	0.00011531	4.67617e-06	6.25955e-05	0
Viral_bacteria__Myoviridae Myoviridae_Unclassified__Pseudomonas phage C11	0	0	0	0	0	2.50865e-05	0	0	0.000844974	2.25045e-05	0	0	5.00764e-05	0
Viral_bacteria__Myoviridae Myoviridae_Unclassified__Pseudomonas phage Lu11	4.19754e-06	0	1.01267e-05	0	0.000103008	0.000150519	7.73934e-05	1.61083e-05	0.000105622	0.00128276	2.66099e-05	3.1798e-05	0.000150229	2.06659e-05
Viral_bacteria__Myoviridae Myoviridae_Unclassified__Pseudomonas phage OBP	1.15432e-05	0	6.07601e-05	1.65369e-05	0	0	7.73934e-05	1.78981e-06	3.96081e-05	0.000281307	1.77399e-05	0	1.25191e-05	0
Viral_bacteria__Myoviridae Myoviridae_Unclassified__Pseudomonas phage PaBG	8.91978e-06	1.91791e-05	0.000101267	0.000104733	0.000360527	0.000627164	0.000154787	2.50574e-05	0.00014523	0.00180036	0.00300692	6.92074e-05	0.000788703	0.000371985
Viral_bacteria__Myoviridae Myoviridae_Unclassified__Pseudomonas phage phi3	7.3457e-06	1.27861e-05	0.000111394	0.000374835	0.00012876	0.000200692	0.000386967	5.7274e-05	0.00257453	0.000303811	0.000195139	5.61141e-06	0.000287939	4.13317e-05
Viral_bacteria__Myoviridae Myoviridae_Unclassified__Pseudomonas phage phiPsa374	1.57408e-06	0	0	5.51228e-06	0	2.50865e-05	0.00023218	1.78981e-06	0.000118824	0	2.66099e-05	1.87047e-06	5.00764e-05	2.06659e-05
Viral_bacteria__Myoviridae Myoviridae_Unclassified__Pseudomonas phage PPpW-3	5.24693e-06	0	0	5.51228e-06	0	0	0.000154787	0	5.28109e-05	3.37568e-05	0.000266099	2.8057e-06	1.25191e-05	0
Viral_bacteria__Myoviridae Myoviridae_Unclassified__Pseudomonas phage vB_Pae_PS44	0	0	0	1.10246e-05	0	0	0	0	0.000132027	0.000191288	0	0	0	0
Viral_bacteria__Myoviridae Myoviridae_Unclassified__Pseudomonas phage vB_PsyM_KIL1	1.04939e-06	0	2.02534e-05	1.10246e-05	0.00012876	0	0	1.78981e-06	0.000752555	1.12523e-05	0	3.74094e-06	0.000112672	0
Viral_bacteria__Myoviridae Myoviridae_Unclassified__Pseudomonas phage VCM	2.62347e-06	6.39304e-06	1.01267e-05	2.20491e-05	0	0	7.73934e-05	0	0.00014523	1.12523e-05	1.77399e-05	9.35235e-07	1.25191e-05	0
Viral_bacteria__Myoviridae Myoviridae_Unclassified__Psychrobacter phage pOW20-A	7.45064e-05	0	1.01267e-05	5.51228e-06	2.5752e-05	0	0.0011609	1.78981e-06	6.60136e-05	3.37568e-05	2.66099e-05	9.35235e-07	0.00013771	0
Viral_bacteria__Myoviridae Myoviridae_Unclassified__Ralstonia phage RSP15	5.24693e-07	0	2.02534e-05	1.10246e-05	5.15039e-05	2.50865e-05	0.000541754	3.57962e-06	5.28109e-05	0.000123775	0	5.61141e-06	3.75573e-05	0
Viral_bacteria__Myoviridae Myoviridae_Unclassified__Rhizobium phage RHEph06	0	0	0	5.51228e-06	2.5752e-05	0	0.00046436	8.94906e-06	0.000184838	4.50091e-05	5.32198e-05	2.89923e-05	5.00764e-05	4.13317e-05
Viral_bacteria__Myoviridae Myoviridae_Unclassified__Rhizobium phage RR1-A	6.82101e-06	0	0	2.20491e-05	0	0.000100346	0.00100611	7.15925e-06	9.2419e-05	0.000213793	0.00332624	5.61141e-06	0.00552092	2.06659e-05
Viral_bacteria__Myoviridae Myoviridae_Unclassified__Rhizobium phage RR1-B	5.24693e-07	0	0	5.51228e-06	2.5752e-05	0	0.000309574	1.78981e-06	0	3.37568e-05	0	3.74094e-06	0	2.06659e-05
Viral_bacteria__Myoviridae Myoviridae_Unclassified__Rhizobium phage vB_RleM_P10VF	1.04939e-06	6.39304e-06	4.05067e-05	7.7172e-05	2.5752e-05	0.000125433	7.73934e-05	1.43185e-05	0.000211243	0.00159782	7.98297e-05	3.74094e-06	8.76336e-05	2.06659e-05
Viral_bacteria__Myoviridae Myoviridae_Unclassified__Rhizobium phage vB_RleM_PPF1	5.24693e-07	0	0	0	0	0	7.73934e-05	0	6.60136e-05	9.00181e-05	0.00010644	9.35235e-07	1.25191e-05	0
Viral_bacteria__Myoviridae Myoviridae_Unclassified__Rhodococcus phage E3	0	0	1.01267e-05	4.96106e-05	0	5.01731e-05	0.000309574	1.61083e-05	2.64054e-05	0.000168784	0.000399148	1.87047e-06	0.000175267	4.13317e-05
Viral_bacteria__Myoviridae Myoviridae_Unclassified__Rhodothermus phage RM378	0	0	0	0	0.000334775	2.50865e-05	0.0158656	0	0.000158433	3.37568e-05	7.09597e-05	2.8057e-06	0	0
Viral_bacteria__Myoviridae Myoviridae_Unclassified__Salmonella phage 38	0	0	0	0	2.5752e-05	0	0	3.57962e-06	0.000422487	2.25045e-05	0	0	0	0
Viral_bacteria__Myoviridae Myoviridae_Unclassified__Salmonella phage BPS15Q2	0.00810651	0.0211098	0.0136204	0.0117632	0.00280696	0.000275952	0.000309574	1.78981e-05	0.000369676	0.000135027	4.43498e-05	2.8057e-06	0.000300458	0.0104776
Viral_bacteria__Myoviridae Myoviridae_Unclassified__Salmonella phage SKML-39	0	0	0	0	0	0	7.73934e-05	0	0.000739352	0	8.86997e-06	0	0	0
Viral_bacteria__Myoviridae Myoviridae_Unclassified__Serratia phage phiMAM1	0	0	0	1.10246e-05	0	0	7.73934e-05	0	0.00289139	1.12523e-05	1.77399e-05	0	3.75573e-05	0
Viral_bacteria__Myoviridae Myoviridae_Unclassified__Shewanella phage Spp001	0	0	0	0	0	0	7.73934e-05	0	0.00266695	0	1.77399e-05	0	0	0
Viral_bacteria__Myoviridae Myoviridae_Unclassified__Shewanella sp. phage 1/4	0	0	0	0	0.000154512	0.000100346	7.73934e-05	0	0.000462095	0.000540109	0	3.74094e-06	0.000225344	0
Viral_bacteria__Myoviridae Myoviridae_Unclassified__Shewanella sp. phage 1/40	1.04939e-06	0	0	0	0.000154512	5.01731e-05	7.73934e-05	1.78981e-06	5.28109e-05	0.000821415	0.000159659	2.71218e-05	0.000112672	0
Viral_bacteria__Myoviridae Myoviridae_Unclassified__Shewanella sp. phage 1/44	5.24693e-07	0	0	1.65369e-05	0	7.52596e-05	0	1.96879e-05	7.92163e-05	1.12523e-05	8.86997e-06	9.35235e-07	0.000100153	0
Viral_bacteria__Myoviridae Myoviridae_Unclassified__Shewanella sp. phage 3/49	0	0	0	1.10246e-05	2.5752e-05	5.01731e-05	0.00332792	1.25287e-05	7.92163e-05	0.000292559	9.75696e-05	9.35235e-07	0.000150229	0
Viral_bacteria__Myoviridae Myoviridae_Unclassified__Shigella phage SfII	3.56791e-05	0	6.07601e-05	3.30737e-05	0	2.50865e-05	0	1.78981e-06	6.60136e-05	0.000281307	8.86997e-06	0	7.51145e-05	2.06659e-05
Viral_bacteria__Myoviridae Myoviridae_Unclassified__Shigella phage SfIV	5.35187e-05	5.11444e-05	0.000192407	0.000176393	2.5752e-05	5.01731e-05	7.73934e-05	1.25287e-05	0.000396081	0.000180036	4.43498e-05	1.87047e-06	0.000150229	0.0042985
Viral_bacteria__Myoviridae Myoviridae_Unclassified__Sinorhizobium phage phiM9	1.04939e-06	0	1.01267e-05	8.26843e-05	0.000180264	0.000275952	0	5.36944e-06	0.000198041	0.00195789	1.77399e-05	1.02876e-05	0.000575878	4.13317e-05
Viral_bacteria__Myoviridae Myoviridae_Unclassified__Sphingomonas phage PAU	9.44448e-06	2.55722e-05	5.06334e-05	9.37088e-05	0.000103008	5.01731e-05	0.000619147	4.83249e-05	0.0019408	0.000303811	0.000239489	6.54664e-06	0.000400611	0.00049598
Viral_bacteria__Myoviridae Myoviridae_Unclassified__Staphylococcus phage SA1	0.004441	0.00851554	0.0060355	0.00609107	0.00345076	0.000551904	0.000928721	7.15925e-06	0.00113543	7.87659e-05	0.000141919	6.54664e-06	0.000112672	0.00539379
Viral_bacteria__Myoviridae Myoviridae_Unclassified__Streptococcus phage EJ-1	0.000116482	0	0	1.65369e-05	0.000154512	5.01731e-05	0.0309574	0.000732033	0.000977001	0.000337568	0.000762817	1.30933e-05	0.000450687	0.000144661
Viral_bacteria__Myoviridae Myoviridae_Unclassified__Synechococcus phage S-CAM8	0	0	0	1.10246e-05	0	0	0.000154787	7.15925e-06	6.60136e-05	4.50091e-05	0.000239489	0	2.50382e-05	0
Viral_bacteria__Myoviridae Myoviridae_Unclassified__Synechococcus phage S-CRM01	3.67285e-06	0	6.07601e-05	1.10246e-05	0	2.50865e-05	7.73934e-05	0	5.28109e-05	0	0.00308675	5.61141e-06	1.25191e-05	0.000433983
Viral_bacteria__Myoviridae Myoviridae_Unclassified__Synechococcus phage S-IOM18	0	0	0	0	0	0.000100346	0	1.78981e-06	0.000105622	0	0.00250133	9.35235e-07	0	2.06659e-05
Viral_bacteria__Myoviridae Myoviridae_Unclassified__Synechococcus phage S-RIM2 R1_1999	0	6.39304e-06	0	5.51228e-06	0	0	0	0	7.92163e-05	0	0.00128615	0	0	4.13317e-05
Viral_bacteria__Myoviridae Myoviridae_Unclassified__Synechococcus phage S-RIM8 A.HR1	5.24693e-07	0	0	0	0	2.50865e-05	0	0	6.60136e-05	0	0.00147241	0	0	2.06659e-05
Viral_bacteria__Myoviridae Myoviridae_Unclassified__Synechococcus phage S-ShM2	1.04939e-06	0	0	5.51228e-06	2.5752e-05	0	0.00023218	1.78981e-06	5.28109e-05	1.12523e-05	2.66099e-05	0	5.00764e-05	4.13317e-05
Viral_bacteria__Myoviridae Myoviridae_Unclassified__Synechococcus phage S-SM1	2.09877e-06	0	3.03801e-05	1.65369e-05	5.15039e-05	0	0	0	0.00014523	0	1.77399e-05	0	2.50382e-05	0.000123995
Viral_bacteria__Myoviridae Myoviridae_Unclassified__Synechococcus phage S-SM2	3.67285e-06	0	6.07601e-05	2.20491e-05	0	0.000225779	0	5.36944e-06	0.00116184	1.12523e-05	0.0212081	0	5.00764e-05	0.000165327
Viral_bacteria__Myoviridae Myoviridae_Unclassified__Synechococcus phage S-SSM5	5.77162e-06	0	2.02534e-05	5.51228e-06	0	0	0	3.57962e-06	0.000132027	7.87659e-05	1.77399e-05	0	1.25191e-05	6.19976e-05
Viral_bacteria__Myoviridae Myoviridae_Unclassified__Synechococcus phage S-WAM1	5.24693e-07	0	0	1.10246e-05	0	0	0	0	0.000726149	3.37568e-05	0	0	2.50382e-05	0
Viral_bacteria__Myoviridae Myoviridae_Unclassified__Thermus phage phiYS40	0	0	0	3.8586e-05	0	0	0.000309574	8.94906e-06	0.000897785	0	6.20898e-05	1.21581e-05	0.000150229	2.06659e-05
Viral_bacteria__Myoviridae Myoviridae_Unclassified__Thermus phage TMA	0	0	5.06334e-05	5.51228e-06	0	0.000125433	7.73934e-05	1.78981e-06	0	1.12523e-05	1.77399e-05	0	0	0
Viral_bacteria__Myoviridae Myoviridae_Unclassified__Vibrio phage 11895-B1	5.24693e-07	0	1.01267e-05	2.20491e-05	2.5752e-05	0	7.73934e-05	1.78981e-06	0.00151831	0.000213793	0.000150789	9.35235e-07	0.00013771	0
Viral_bacteria__Myoviridae Myoviridae_Unclassified__Vibrio phage CP-T1	0	0	0	0	0	0	7.73934e-05	1.61083e-05	0.00265375	3.37568e-05	8.86997e-06	0	1.25191e-05	2.06659e-05
Viral_bacteria__Myoviridae Myoviridae_Unclassified__Vibrio phage ICP1	1.04939e-06	0	4.05067e-05	3.30737e-05	0	0	0.000541754	0	0.00158433	0.000753902	0.000682987	1.87047e-06	2.50382e-05	0
Viral_bacteria__Myoviridae Myoviridae_Unclassified__Vibrio phage vB_VchM-138	0	0	0	0	0	7.52596e-05	7.73934e-05	3.57962e-06	1.32027e-05	4.50091e-05	2.66099e-05	0	0.000125191	0
Viral_bacteria__Myoviridae Myoviridae_Unclassified__Vibrio phage X29	0.00377517	0	5.06334e-05	6.06351e-05	0.000180264	5.01731e-05	0.00185744	0.000107389	0.00323467	0.000157532	0.00851517	1.49638e-05	0.000513283	2.06659e-05
Viral_bacteria__Myoviridae Myoviridae_Unclassified__Yersinia phage phiR1-37	0	0	1.01267e-05	2.20491e-05	0.000283272	0.000326125	0.00874545	0	0.000567717	0.000180036	4.43498e-05	3.92799e-05	0.000200305	2.06659e-05
Viral_bacteria__Myoviridae Nit1virus__Bacillus virus Grass	4.19754e-06	0	5.06334e-05	2.20491e-05	5.15039e-05	2.50865e-05	0.00046436	1.07389e-05	0.000712947	0.000281307	0.000221749	9.35235e-06	0.000500764	0
Viral_bacteria__Myoviridae Nit1virus__Bacillus virus NIT1	4.19754e-06	0	2.02534e-05	1.65369e-05	0.00012876	7.52596e-05	0.000154787	8.94906e-06	9.2419e-05	0.000168784	0.00279404	5.61141e-06	0.000100153	4.13317e-05
Viral_bacteria__Myoviridae P100virus__Listeria virus A511	0	0	0	0	0	0	0.000154787	1.78981e-06	5.28109e-05	1.12523e-05	0	0	0	0
Viral_bacteria__Myoviridae P1virus__Escherichia virus P1	0.000514199	6.39304e-06	0.00018228	0.000126783	0.000437783	0.00080277	0.000619147	1.61083e-05	0.000580919	0.000900181	0.0018893	4.86322e-05	0.000638474	0.000309988
Viral_bacteria__Myoviridae P1virus__Salmonella phage SJ46	0.000483767	1.27861e-05	0.000283547	9.92211e-05	5.15039e-05	5.01731e-05	0.000154787	2.14777e-05	0.000356473	0.000303811	9.75696e-05	3.74094e-06	0.000125191	0.00024799
Viral_bacteria__Myoviridae P2virus__Burkholderia phage KL3	5.24693e-06	1.27861e-05	1.01267e-05	4.96106e-05	0.00012876	0	7.73934e-05	5.36944e-06	0.000118824	2.25045e-05	6.20898e-05	2.89923e-05	5.00764e-05	0
Viral_bacteria__Myoviridae P2virus__Burkholderia phage KS14	1.04939e-06	0	4.05067e-05	5.51228e-06	2.5752e-05	0	0.000154787	0	6.60136e-05	0	8.86997e-06	9.35235e-07	0	0.000103329
Viral_bacteria__Myoviridae P2virus__Burkholderia virus phiE122	0	0	5.06334e-05	0	0	0	0.00023218	0	0	4.50091e-05	8.86997e-06	0	0	2.06659e-05
Viral_bacteria__Myoviridae P2virus__Burkholderia virus phiE202	0	0	0	0	0	0	0	1.25287e-05	3.96081e-05	0.000112523	0	2.8057e-06	1.25191e-05	0
Viral_bacteria__Myoviridae P2virus__Enterobacteria phage fiAA91-ss	0.000203056	2.55722e-05	9.11402e-05	0.000137807	0	0	0.000309574	1.78981e-06	2.64054e-05	0.000213793	0	0	1.25191e-05	0.00105396
Viral_bacteria__Myoviridae P2virus__Escherichia phage pro147	0.000115432	0	0	5.51228e-06	2.5752e-05	0	0	0	1.32027e-05	1.12523e-05	8.86997e-06	0	0	0
Viral_bacteria__Myoviridae P2virus__Escherichia virus P2	0.000169476	0	0	0	0	0	0	0	0	0	0	0	0	0
Viral_bacteria__Myoviridae P2virus__Mannheimia phage vB_MhM_587AP1	9.96917e-06	1.27861e-05	1.01267e-05	3.8586e-05	5.15039e-05	0	0.000309574	8.94906e-06	0.000580919	1.12523e-05	3.54799e-05	0	6.25955e-05	0
Viral_bacteria__Myoviridae P2virus__Ralstonia phage RSA1	5.24693e-07	0	0	5.51228e-06	0	0	0	0	0.00106942	3.37568e-05	0.000319319	4.67617e-06	1.25191e-05	0
Viral_bacteria__Myoviridae P2virus__Ralstonia phage RSY1	1.41667e-05	0	6.07601e-05	6.61474e-05	2.5752e-05	0	7.73934e-05	9.84396e-05	1.32027e-05	0.00010127	8.86997e-06	9.35235e-07	1.25191e-05	0.000165327
Viral_bacteria__Myoviridae P2virus__Stenotrophomonas phage Smp131	8.08027e-05	0	0	2.20491e-05	0	0	0	1.78981e-05	0.000132027	1.12523e-05	5.32198e-05	0.000138415	1.25191e-05	0
Viral_bacteria__Myoviridae Pbunavirus__Burkholderia virus BcepF1	0	0	0	0	5.15039e-05	0.000150519	0	1.78981e-06	0.000118824	0.000461343	0	3.74094e-06	6.25955e-05	0
Viral_bacteria__Myoviridae Phikzvirus__Pseudomonas phage 201phi2-1	1.62655e-05	0	6.07601e-05	2.20491e-05	0	0	7.73934e-05	3.57962e-06	7.92163e-05	0.000112523	9.75696e-05	9.35235e-07	8.76336e-05	4.13317e-05
Viral_bacteria__Myoviridae Phikzvirus__Pseudomonas phage PhiPA3	1.10186e-05	0	5.06334e-05	0.000104733	0.00025752	0.000551904	0.000309574	1.25287e-05	0.000382879	0.00135027	0.00011531	3.55389e-05	0.000625955	0.000413317
Viral_bacteria__Myoviridae Rb49virus__Escherichia virus JSE	0.000342625	1.91791e-05	0.000658235	0.00108592	0.0292285	0.00396367	0.00123829	1.78981e-05	0.000118824	0.00034882	9.75696e-05	9.35235e-07	5.00764e-05	6.19976e-05
Viral_bacteria__Myoviridae Rb49virus__Escherichia virus phi1	9.65435e-05	4.47513e-05	0.000202534	0.000369323	0.00726205	0.00132959	0.000154787	0	1.32027e-05	4.50091e-05	8.86997e-06	0	2.50382e-05	0
Viral_bacteria__Myoviridae Rb49virus__Escherichia virus RB49	3.30557e-05	0	0.000101267	0.000170881	0.00527915	0.000752596	0.00023218	0	0	0	0	0	0	0
Viral_bacteria__Myoviridae Rb69virus__Escherichia virus JS09	2.62347e-05	9.58957e-05	0.000688615	0.000429958	0	0	0.00023218	3.57962e-06	1.32027e-05	2.25045e-05	0	0	0	6.19976e-05
Viral_bacteria__Myoviridae Rb69virus__Escherichia virus RB69	1.78396e-05	7.03235e-05	0.000303801	0.000209467	0	0	0	0	2.64054e-05	2.25045e-05	5.32198e-05	1.87047e-06	0	4.13317e-05
Viral_bacteria__Myoviridae Rb69virus__Shigella virus UTAM	3.14816e-05	0.000121468	0.000840515	0.000259077	0	0	0	0	0	0	0	0	0	4.13317e-05
Viral_bacteria__Myoviridae Rsl2virus__Ralstonia virus RSF1	4.19754e-06	6.39304e-06	3.03801e-05	6.06351e-05	0.000669551	0.000702423	0.000154787	1.43185e-05	0.000224446	0.00106897	0.000221749	9.07178e-05	0.000713588	0.000123995
Viral_bacteria__Myoviridae Rsl2virus__Ralstonia virus RSL2	5.24693e-06	0	4.05067e-05	2.75614e-05	0.00012876	5.01731e-05	0.00023218	7.15925e-06	0.000105622	0.000416334	1.77399e-05	9.35235e-06	5.00764e-05	0.000185993
Viral_bacteria__Myoviridae Schizot4virus__Vibrio phage VH7D	2.62347e-06	1.91791e-05	0	2.75614e-05	2.5752e-05	5.01731e-05	0.000154787	1.43185e-05	0.00121465	0.000270054	9.75696e-05	3.74094e-06	0.000212825	0
Viral_bacteria__Myoviridae Schizot4virus__Vibrio virus KVP40	1.57408e-06	0	1.01267e-05	2.75614e-05	0.000463535	0.000351212	0.000309574	0	0.000198041	0.00010127	7.09597e-05	9.35235e-07	0.00013771	0
Viral_bacteria__Myoviridae Schizot4virus__Vibrio virus nt1	3.67285e-06	0	2.02534e-05	1.10246e-05	0	2.50865e-05	0	0	0.00102981	0.000765154	0	9.35235e-07	0.000125191	2.06659e-05
Viral_bacteria__Myoviridae Se1virus__Cronobacter virus GAP31	1.04939e-06	0	0	0	0	2.50865e-05	0	0	0.000937393	0	0.000141919	3.55389e-05	6.25955e-05	2.06659e-05
Viral_bacteria__Myoviridae Se1virus__Escherichia virus 4MG	5.24693e-07	0	0	1.65369e-05	0	0	7.73934e-05	0	0.000158433	3.37568e-05	0	6.54664e-05	6.25955e-05	2.06659e-05
Viral_bacteria__Myoviridae Se1virus__Salmonella virus SE1	3.67285e-06	0	2.02534e-05	1.10246e-05	0.000206016	0.000100346	0.00023218	1.43185e-05	0.000950595	2.25045e-05	4.43498e-05	9.35235e-06	0.000262901	2.06659e-05
Viral_bacteria__Myoviridae Se1virus__Salmonella virus SSE121	0	0	0	0	0	2.50865e-05	0	0	0	0	0	0	0.00169008	0
Viral_bacteria__Myoviridae Secunda5virus__Aeromonas virus Aes12	2.09877e-06	6.39304e-06	2.02534e-05	1.10246e-05	2.5752e-05	2.50865e-05	7.73934e-05	8.94906e-06	0.000184838	0.00201416	1.77399e-05	1.12228e-05	0.000212825	2.06659e-05
Viral_bacteria__Myoviridae Secunda5virus__Aeromonas virus Aes508	0	0	0	0	5.15039e-05	0	0.00441142	0	0.00741993	5.62613e-05	3.54799e-05	0	0	2.06659e-05
Viral_bacteria__Myoviridae Secunda5virus__Aeromonas virus AS4	0	0	0	0	0	0	0	0	5.28109e-05	0.00059637	0	0	0	0
Viral_bacteria__Myoviridae Sep1virus__Staphylococcus virus IPLAC1C	4.19754e-06	0	0.000648108	0	0.0013391	0	0	0	3.96081e-05	2.25045e-05	8.86997e-06	5.42436e-05	0.00013771	8.26634e-05
Viral_bacteria__Myoviridae Silviavirus__Staphylococcus phage Stau2	0	0	0	0	0	0.000175606	0.000154787	7.15925e-06	3.96081e-05	9.00181e-05	6.20898e-05	0	0.000112672	8.26634e-05
Viral_bacteria__Myoviridae Silviavirus__Staphylococcus virus SA11	0	0	0	0	7.72559e-05	0	0	3.57962e-06	0.000211243	5.62613e-05	8.86997e-06	4.67617e-06	3.75573e-05	2.06659e-05
Viral_bacteria__Myoviridae Sp18virus__Escherichia virus VR20	9.96917e-06	6.39304e-06	0.000222787	2.20491e-05	2.5752e-05	2.50865e-05	0	3.57962e-06	1.32027e-05	0.00104646	2.66099e-05	4.67617e-06	0.000125191	0.000123995
Viral_bacteria__Myoviridae Sp18virus__Escherichia virus VR25	6.82101e-06	6.39304e-06	0.000111394	4.96106e-05	0	0.000125433	7.73934e-05	0	0	4.50091e-05	0.000195139	2.52513e-05	1.25191e-05	2.06659e-05
Viral_bacteria__Myoviridae Sp18virus__Escherichia virus VR26	6.29632e-06	3.83583e-05	0.000202534	5.51228e-05	0	0.000200692	0.000773934	0	0	1.12523e-05	0	1.12228e-05	0.000200305	2.06659e-05
Viral_bacteria__Myoviridae Sp18virus__Escherichia virus VR7	3.67285e-06	0	0	5.51228e-06	0	0	0.00023218	0	0	2.25045e-05	2.66099e-05	5.61141e-06	1.25191e-05	0
Viral_bacteria__Myoviridae Sp18virus__Shigella virus SP18	9.96917e-06	0	0	0	0.000360527	0.00065225	0	0	1.32027e-05	9.00181e-05	0	3.74094e-05	0.000162748	0
Viral_bacteria__Myoviridae Spo1virus__Bacillus virus Camphawk	5.77162e-06	6.39304e-06	2.02534e-05	9.92211e-05	0.000901319	0.00110381	0.00023218	2.32676e-05	0.00138629	0.00103521	0.000239489	6.73369e-05	0.000701069	0.000165327
Viral_bacteria__Myoviridae Spo1virus__Bacillus virus SPO1	1.04939e-06	0	2.02534e-05	1.65369e-05	0	2.50865e-05	0.00023218	8.94906e-06	0.000105622	0.00010127	3.54799e-05	9.35235e-07	3.75573e-05	0.000103329
Viral_bacteria__Myoviridae Spo1virus__Listeria phage vB_LmoM_AG20	0	0	0	0	0	0	0	1.78981e-06	0	0	0.000363669	0	0	0
Viral_bacteria__Myoviridae Suspvirus__Escherichia virus SUSP1	0.00168846	0.00180923	0.00127596	0.00106387	2.5752e-05	0	0	5.36944e-06	7.92163e-05	0	3.54799e-05	0	6.25955e-05	0.00204592
Viral_bacteria__Myoviridae Suspvirus__Escherichia virus SUSP2	0.00370014	0.00673188	0.00455701	0.00226555	0	0	0	1.61083e-05	0.00124106	0.000123775	4.43498e-05	4.67617e-06	0.00013771	0.00415384
Viral_bacteria__Myoviridae T4virus__Acinetobacter phage Acj61	3.14816e-06	6.39304e-06	1.01267e-05	0	0	0	0	0	3.96081e-05	4.50091e-05	8.86997e-06	0	0.000538321	0
Viral_bacteria__Myoviridae T4virus__Acinetobacter phage Acj9	1.57408e-06	0	0	5.51228e-06	0	0	0	0	0.000184838	0	8.86997e-06	0	0	2.06659e-05
Viral_bacteria__Myoviridae T4virus__Acinetobacter virus 133	1.57408e-06	0	0	0	0	0	0.000154787	0	0.000343271	2.25045e-05	2.66099e-05	1.02876e-05	0	0
Viral_bacteria__Myoviridae T4virus__Aeromonas phage CC2	2.62347e-06	6.39304e-06	1.01267e-05	1.65369e-05	0	2.50865e-05	0.000154787	0	0.000184838	0.000213793	0.000150789	9.35235e-07	2.50382e-05	0
Viral_bacteria__Myoviridae T4virus__Aeromonas phage phiAS5	6.82101e-06	0	0	1.65369e-05	5.15039e-05	0	0	1.78981e-06	0.000211243	4.50091e-05	1.77399e-05	9.35235e-07	5.00764e-05	6.19976e-05
Viral_bacteria__Myoviridae T4virus__Aeromonas phage PX29	2.62347e-06	0	0	5.51228e-06	0	5.01731e-05	0.000154787	5.36944e-06	5.28109e-05	5.62613e-05	4.43498e-05	4.67617e-06	0.000400611	0
Viral_bacteria__Myoviridae T4virus__Aeromonas virus 31	6.29632e-06	6.39304e-06	0.000101267	9.92211e-05	0.000437783	0.000526818	0.000386967	4.11657e-05	0.000620528	0.00191288	0.000221749	0.000102876	0.00055084	0.000165327
Viral_bacteria__Myoviridae T4virus__Aeromonas virus 65	4.72224e-06	0	3.03801e-05	1.65369e-05	5.15039e-05	7.52596e-05	0	5.36944e-06	0.000158433	0.000551361	7.98297e-05	7.48188e-06	8.76336e-05	6.19976e-05
Viral_bacteria__Myoviridae T4virus__Aeromonas virus Aeh1	7.3457e-06	0	1.01267e-05	2.20491e-05	2.5752e-05	0	0	1.78981e-06	5.28109e-05	0.000146279	8.86997e-05	5.61141e-06	0.000100153	0.000103329
Viral_bacteria__Myoviridae T4virus__Citrobacter phage IME-CF2	6.29632e-06	0	0	0	0.000180264	0	0	1.78981e-06	7.92163e-05	2.25045e-05	6.20898e-05	1.30933e-05	5.00764e-05	2.06659e-05
Viral_bacteria__Myoviridae T4virus__Citrobacter phage Margaery	1.04939e-06	6.39304e-06	2.02534e-05	1.10246e-05	0	5.01731e-05	7.73934e-05	3.57962e-06	0.000660136	0	9.75696e-05	9.35235e-07	3.75573e-05	2.06659e-05
Viral_bacteria__Myoviridae T4virus__Enterobacteria phage GEC-3S	1.57408e-05	0	4.05067e-05	7.16597e-05	0.0019829	0.000225779	0.000154787	0	1.32027e-05	0	0	0	0	0
Viral_bacteria__Myoviridae T4virus__Enterobacteria phage RB14	0.000945497	0.00436006	0.0191901	0.00738646	2.5752e-05	0.000175606	0	8.94906e-06	9.2419e-05	2.25045e-05	1.77399e-05	4.67617e-06	2.50382e-05	0.00111596
Viral_bacteria__Myoviridae T4virus__Enterobacteria phage RB27	0.000539385	0.00257	0.0100659	0.00335147	5.15039e-05	7.52596e-05	0	1.78981e-06	2.64054e-05	3.37568e-05	2.66099e-05	0	1.25191e-05	0.000537312
Viral_bacteria__Myoviridae T4virus__Enterobacteria phage RB3	0.00023926	0.00193709	0.00863806	0.00288844	7.72559e-05	0	0	0	2.64054e-05	0	0	1.87047e-06	0	0.000289322
Viral_bacteria__Myoviridae T4virus__Enterobacteria phage RB32	0.000327933	0.00177727	0.00844566	0.00360503	0	0	0	0	2.64054e-05	1.12523e-05	0	9.35235e-07	2.50382e-05	0.000268656
Viral_bacteria__Myoviridae T4virus__Enterobacteria phage RB51	0.00033423	0.00130418	0.00525575	0.00131744	2.5752e-05	2.50865e-05	0	0	1.32027e-05	1.12523e-05	1.77399e-05	0	0	0.000206659
Viral_bacteria__Myoviridae T4virus__Enterobacteria phage T4 sensu lato	0.000419754	0.00145761	0.00654184	0.00226555	0	5.01731e-05	0	3.57962e-06	3.96081e-05	2.25045e-05	1.77399e-05	0	1.25191e-05	0.000413317
Viral_bacteria__Myoviridae T4virus__Escherichia phage slur02	0.00088988	0.00302391	0.014309	0.00284434	2.5752e-05	5.01731e-05	0	3.57962e-06	9.2419e-05	5.62613e-05	4.43498e-05	0	1.25191e-05	0.000330654
Viral_bacteria__Myoviridae T4virus__Escherichia phage slur07	0.000304847	0.00148319	0.00646082	0.00206159	0.000103008	5.01731e-05	0	0	0	0	0	0	1.25191e-05	0.000330654
Viral_bacteria__Myoviridae T4virus__Escherichia phage slur08	0.000305371	0.00135533	0.00574183	0.00149934	5.15039e-05	0	0	1.78981e-06	5.28109e-05	0	0	0	1.25191e-05	0.00024799
Viral_bacteria__Myoviridae T4virus__Escherichia phage vB_EcoM_PhAPEC2	2.62347e-06	5.11444e-05	0.000131647	7.7172e-05	0	0	0	0	0	2.25045e-05	0	0	0	0
Viral_bacteria__Myoviridae T4virus__Escherichia phage wV7	9.28707e-05	0.000262115	0.000962035	0.000181905	0	0	7.73934e-05	0	1.32027e-05	0	0	9.35235e-07	2.50382e-05	8.26634e-05
Viral_bacteria__Myoviridae T4virus__Escherichia virus AR1	0.000464353	0.00258918	0.0106634	0.00323571	0	5.01731e-05	0	1.78981e-06	2.64054e-05	2.25045e-05	0	9.35235e-07	2.50382e-05	0.000537312
Viral_bacteria__Myoviridae T4virus__Escherichia virus C40	0.000384075	0.00218003	0.0109368	0.00452007	0.00012876	0	0	0	1.32027e-05	0	0	0	0	0.000454649
Viral_bacteria__Myoviridae T4virus__Escherichia virus ECML134	0.000198859	0.00103567	0.00418232	0.00195686	0	0	0	0	3.96081e-05	0	8.86997e-06	0	0	0.000227324
Viral_bacteria__Myoviridae T4virus__Escherichia virus Ime09	0.000191513	0.000600946	0.00235952	0.000760695	0	5.01731e-05	0	1.78981e-06	0	1.12523e-05	1.77399e-05	0	2.50382e-05	6.19976e-05
Viral_bacteria__Myoviridae T4virus__Prochlorococcus phage P-SSM2	1.94136e-05	2.55722e-05	0.00024304	0.000275614	7.72559e-05	0.000100346	0.000696541	4.83249e-05	0.0019672	0.000315063	0.000425758	4.67617e-06	0.000838779	0.00059931
Viral_bacteria__Myoviridae T4virus__Proteus phage vB_PmiM_Pm5461	1.10186e-05	1.91791e-05	3.03801e-05	7.16597e-05	0	0	0	7.15925e-06	3.96081e-05	0.00034882	0.000141919	2.8057e-06	0.000300458	0.000103329
Viral_bacteria__Myoviridae T4virus__Salmonella phage vB_SnwM_CGG4-1	1.57408e-06	0	0.000111394	8.81965e-05	0	0.000100346	7.73934e-05	0	2.64054e-05	5.62613e-05	2.66099e-05	2.71218e-05	0.00013771	0
Viral_bacteria__Myoviridae T4virus__Shigella phage SHBML-50-1	0.000183643	0.000607339	0.00171141	0.000336249	0	0	0	0	2.64054e-05	0	0	0	0	0.000206659
Viral_bacteria__Myoviridae T4virus__Shigella phage SHFML-11	0.000108087	0.00111239	0.00580259	0.00287741	5.15039e-05	0	0	0	0	0	8.86997e-06	0	0	2.06659e-05
Viral_bacteria__Myoviridae T4virus__Shigella phage SHFML-26	0.000147963	0.000997315	0.00443549	0.00298215	0	2.50865e-05	0	1.78981e-06	1.32027e-05	1.12523e-05	0	0	0	0.000123995
Viral_bacteria__Myoviridae T4virus__Shigella phage SHSML-52-1	9.96917e-06	1.91791e-05	0.000283547	1.65369e-05	0	0	0	0	2.64054e-05	0	0	0	1.25191e-05	0
Viral_bacteria__Myoviridae T4virus__Shigella virus Pss1	1.99383e-05	9.58957e-05	0.000465828	7.16597e-05	0	0	0	0	1.32027e-05	1.12523e-05	0	0	0	4.13317e-05
Viral_bacteria__Myoviridae T4virus__Shigella virus Shfl2	0.00033423	0.000620125	0.00250129	0.000573278	0	0	0	0	2.64054e-05	1.12523e-05	8.86997e-06	0	0	0.000165327
Viral_bacteria__Myoviridae T4virus__Synechococcus phage ACG-2014b	5.24693e-07	0	1.01267e-05	1.10246e-05	0	0	0	7.15925e-06	5.28109e-05	0	3.54799e-05	1.87047e-06	3.75573e-05	0.000103329
Viral_bacteria__Myoviridae T4virus__Synechococcus phage ACG-2014c	5.24693e-07	0	0	2.20491e-05	0	0	0	1.25287e-05	0.000250852	4.50091e-05	4.43498e-05	0	3.75573e-05	0
Viral_bacteria__Myoviridae T4virus__Synechococcus phage ACG-2014f	9.96917e-06	6.39304e-06	9.11402e-05	8.26843e-05	2.5752e-05	5.01731e-05	0.000154787	1.43185e-05	0.000765757	9.00181e-05	8.86997e-05	0	0.000463206	4.13317e-05
Viral_bacteria__Myoviridae T4virus__Synechococcus phage S-MbCM100	1.57408e-06	0	0	0	0.00012876	0	0	3.57962e-06	0.000118824	2.25045e-05	4.43498e-05	9.35235e-07	1.25191e-05	0
Viral_bacteria__Myoviridae T4virus__Synechococcus phage syn9	1.57408e-06	0	1.01267e-05	5.51228e-06	0	0	0	0	2.64054e-05	0	8.86997e-06	0	3.75573e-05	0.000185993
Viral_bacteria__Myoviridae T4virus__Yersinia virus D1	0.000115432	0.000613732	0.0022785	0.000760695	2.5752e-05	0	0	0	1.32027e-05	1.12523e-05	0	0	0	4.13317e-05
Viral_bacteria__Myoviridae T4virus__Yersinia virus PST	0.000120679	0.0007352	0.00312915	0.00187418	0	2.50865e-05	0	0	0	0	0	0	0	0.000123995
Viral_bacteria__Myoviridae Tsarbombavirus__Bacillus virus BCP78	0	0	1.01267e-05	5.51228e-06	2.5752e-05	5.01731e-05	0.000386967	2.8637e-05	0.0116712	0.000562613	1.77399e-05	0	0.000425649	0
Viral_bacteria__Myoviridae Tsarbombavirus__Bacillus virus TsarBomba	0	0	0	5.51228e-06	2.5752e-05	0.000125433	0.000154787	7.15925e-06	0.0179689	0.000551361	0.00010644	9.35235e-07	0.000525802	0
Viral_bacteria__Myoviridae Twortvirus__Staphylococcus phage Twort	0	0	1.01267e-05	1.10246e-05	7.72559e-05	0	0.000541754	0	0.000422487	1.12523e-05	2.66099e-05	4.67617e-06	0.000125191	0.000165327
Viral_bacteria__Myoviridae Twortvirus__Staphylococcus phage vB_SauM_Remus	5.24693e-07	0	0	0	0	0.000150519	7.73934e-05	0	0.000171635	4.50091e-05	0.000612028	0	0.000976489	0
Viral_bacteria__Myoviridae V5virus__Escherichia virus FFH2	5.24693e-07	0.000223757	9.11402e-05	0.000523667	0	0	0	0	0	0.000472595	0	0	0	0.000103329
Viral_bacteria__Myoviridae Vhmlvirus__Vibrio virus MAR	9.39201e-05	0	5.06334e-05	1.65369e-05	0.000206016	0.000401385	0.00023218	1.78981e-06	0.000105622	0.000258802	0.00347703	1.87047e-05	0.000212825	2.06659e-05
Viral_bacteria__Myoviridae Vi1virus__Escherichia virus ECML4	0	0	0	0	0	0	0	0	0.000396081	2.25045e-05	0	0	0	0
Viral_bacteria__Myoviridae Vi1virus__Shigella virus AG3	0	0	1.01267e-05	6.61474e-05	0	0	7.73934e-05	0	0.00014523	0	0	0	0	0
Viral_bacteria__Myoviridae Wphvirus__Bacillus virus WPh	0	0	0	1.10246e-05	7.72559e-05	0	0.00147047	1.78981e-06	0.000712947	4.50091e-05	0.000496718	2.8057e-05	0.00013771	0
Viral_bacteria__Nitrincola phage 1M3-16 Nitrincola phage 1M3-16_Unclassified__Nitrincola phage 1M3-16	5.24693e-07	0	1.01267e-05	2.75614e-05	0	0.000100346	0	1.78981e-06	0.000118824	9.00181e-05	0.0112294	1.02876e-05	0.00027542	0
Viral_bacteria__Oenococcus phage phi9805 Oenococcus phage phi9805_Unclassified__Oenococcus phage phi9805	3.14816e-06	0	7.08868e-05	7.16597e-05	0.000180264	0.000376298	0.000696541	6.98027e-05	0.000514906	0.00110272	0.000363669	0.000103811	0.000450687	0.00059931
Viral_bacteria__Oenococcus phage phiS11 Oenococcus phage phiS11_Unclassified__Oenococcus phage phiS11	5.24693e-07	3.19652e-05	3.03801e-05	3.8586e-05	5.15039e-05	5.01731e-05	0.000541754	1.78981e-05	0.000132027	5.62613e-05	0.000292709	1.77695e-05	0.00013771	0
Viral_bacteria__Oenococcus phage phiS13 Oenococcus phage phiS13_Unclassified__Oenococcus phage phiS13	5.24693e-07	0	0	2.20491e-05	5.15039e-05	0.000426471	0	0	1.32027e-05	5.62613e-05	0.000567678	6.54664e-06	0.00440672	0
Viral_bacteria__Paenibacillus phage phiIBB_Pl23 Paenibacillus phage phiIBB_Pl23_Unclassified__Paenibacillus phage phiIBB_Pl23	8.65744e-05	0	0	3.30737e-05	5.15039e-05	0.000677337	0.00178005	2.32676e-05	0.000937393	0.000675136	0.00351251	7.48188e-06	0.00217832	2.06659e-05
Viral_bacteria__Podoviridae Bcep22virus__Burkholderia virus Bcep22	2.62347e-06	0	4.05067e-05	0.000115758	0.000103008	0.000175606	0.000928721	6.08536e-05	0.000660136	0.000933938	0.000558808	4.67617e-06	0.000363054	6.19976e-05
Viral_bacteria__Podoviridae Bcep22virus__Burkholderia virus Bcepil02	1.57408e-06	0	2.02534e-05	4.96106e-05	0.000154512	0	0.000154787	1.78981e-06	6.60136e-05	5.62613e-05	3.54799e-05	1.87047e-06	0.000175267	2.06659e-05
Viral_bacteria__Podoviridae Bcep22virus__Burkholderia virus DC1	1.57408e-06	0	2.02534e-05	4.96106e-05	7.72559e-05	5.01731e-05	0.00046436	2.50574e-05	0.000264054	0.000585118	0.000257229	2.8057e-06	0.000375573	2.06659e-05
Viral_bacteria__Podoviridae Bpp1virus__Bordetella virus BPP1	1.46914e-05	0	2.02534e-05	1.10246e-05	0	0	0.00023218	2.68472e-05	0.00100341	7.87659e-05	8.86997e-06	9.35235e-07	2.50382e-05	2.06659e-05
Viral_bacteria__Podoviridae Bpp1virus__Burkholderia virus BcepC6B	0	0	0	0	0	2.50865e-05	0.000154787	3.57962e-06	0.00014523	2.25045e-05	0	1.87047e-06	0	4.13317e-05
Viral_bacteria__Podoviridae Cba41virus__Cellulophaga virus Cba172	1.57408e-06	0	0	3.30737e-05	0.0235888	0.000426471	0.000696541	1.07389e-05	0.0263922	0.000146279	0.0106173	0.00230442	0.000338015	0
Viral_bacteria__Podoviridae Cba41virus__Cellulophaga virus Cba41	0	0	0	0	0.000103008	2.50865e-05	0	0	2.64054e-05	1.12523e-05	9.75696e-05	0	0	0
Viral_bacteria__Podoviridae Cp1virus__Streptococcus virus Cp1	2.09877e-06	0	2.02534e-05	0	0.000386279	0.00065225	0.000309574	5.7274e-05	0.00117504	7.87659e-05	0.00102005	2.15104e-05	0.00192794	4.13317e-05
Viral_bacteria__Podoviridae Epsilon15virus__Escherichia phage TL-2011b	0.000215649	0	5.06334e-05	5.51228e-06	0	0.000100346	0.00023218	1.96879e-05	0.00260093	0.000292559	0.00360121	9.35235e-06	0.0011142	2.06659e-05
Viral_bacteria__Podoviridae Epsilon15virus__Escherichia virus phiV10	8.39509e-05	0	0	5.51228e-06	2.5752e-05	0	0	2.68472e-05	0.00101661	0.000146279	0.000940216	4.67617e-06	0.000701069	4.13317e-05
Viral_bacteria__Podoviridae Epsilon15virus__Salmonella virus Epsilon15	1.04939e-05	0	0	5.51228e-06	0	0	0	3.57962e-06	0.000448892	2.25045e-05	4.43498e-05	9.35235e-07	6.25955e-05	0
Viral_bacteria__Podoviridae Epsilon15virus__Salmonella virus SPN1S	2.571e-05	0	0	0	0	0	0.000154787	5.36944e-06	0.000237649	1.12523e-05	7.98297e-05	9.35235e-07	0.000100153	0
Viral_bacteria__Podoviridae F116virus__Pseudomonas phage F116	2.09877e-06	0	4.05067e-05	1.10246e-05	2.5752e-05	0	0.000386967	5.36944e-06	0.000132027	4.50091e-05	0.00131276	0	0.000225344	4.13317e-05
Viral_bacteria__Podoviridae G7cvirus__Escherichia virus APEC5	5.24693e-07	0	0	0	0	0	0	0	0.00168995	0	8.86997e-06	0	1.25191e-05	2.06659e-05
Viral_bacteria__Podoviridae G7cvirus__Escherichia virus G7C	0	0	0	5.51228e-06	0	0	0	0	0	0	0	0	0.000112672	0
Viral_bacteria__Podoviridae G7cvirus__Escherichia virus IME11	0	0	3.03801e-05	0.000137807	0	0	0	0	0.000382879	0	0	0	0	0
Viral_bacteria__Podoviridae Kf1virus__Edwardsiella virus KF1	0	1.27861e-05	0	0	0	0	0	1.07389e-05	0	0	0.000274969	9.35235e-07	0	0
Viral_bacteria__Podoviridae Kp34virus__Klebsiella virus K244	0	0	0	0	0	0	0	0	0	0	0.00010644	9.35235e-07	0	0
Viral_bacteria__Podoviridae Kp34virus__Klebsiella virus KpV71	0	0	0	0	5.15039e-05	0	0.000154787	0	0	0	0.000221749	3.74094e-06	0	0
Viral_bacteria__Podoviridae Luz7virus__Pseudomonas virus KPP21	1.57408e-06	0	1.01267e-05	2.20491e-05	0	0	0.000154787	1.78981e-06	2.64054e-05	0	0	0	0	0
Viral_bacteria__Podoviridae N4virus__Acinetobacter phage Presley	0	0	1.01267e-05	5.51228e-06	2.5752e-05	0	0.00023218	1.78981e-06	6.60136e-05	0	8.86997e-06	1.87047e-06	1.25191e-05	2.06659e-05
Viral_bacteria__Podoviridae N4virus__Erwinia phage vB_EamP-S6	0.000132747	0	5.06334e-05	0	5.15039e-05	0	7.73934e-05	0	3.96081e-05	3.37568e-05	1.77399e-05	0	0.000100153	2.06659e-05
Viral_bacteria__Podoviridae N4virus__Salmonella phage FSL SP-058	5.24693e-06	1.91791e-05	2.02534e-05	5.51228e-06	0	0	0.00023218	0	0	3.37568e-05	2.66099e-05	1.49638e-05	1.25191e-05	0
Viral_bacteria__Podoviridae N4virus__Vibrio phage JA-1	0	0	0	0	0.000103008	0.000175606	0.00433403	4.11657e-05	3.96081e-05	0.00010127	0.000372539	9.35235e-07	2.50382e-05	0
Viral_bacteria__Podoviridae Nona33virus__Escherichia virus 24B	1.83643e-05	1.27861e-05	1.01267e-05	2.20491e-05	0	5.01731e-05	0.000154787	5.36944e-06	0.000277257	0.000157532	0.00010644	4.67617e-05	0.000150229	0.000103329
Viral_bacteria__Podoviridae Nona33virus__Escherichia virus Stx2 II	0.000217223	0	8.10135e-05	1.10246e-05	0	0	0	1.78981e-06	2.64054e-05	1.12523e-05	0	0	1.25191e-05	4.13317e-05
Viral_bacteria__Podoviridae P22virus__Enterobacteria phage ST104	8.91978e-06	0	5.06334e-05	3.30737e-05	0.00025752	2.50865e-05	0.00023218	5.01147e-05	6.60136e-05	0.000191288	0.0141742	1.30933e-05	8.76336e-05	2.06659e-05
Viral_bacteria__Podoviridae P22virus__Salmonella phage epsilon34	4.72224e-06	6.39304e-06	3.03801e-05	2.75614e-05	5.15039e-05	0.000100346	0	0.000127077	0.000105622	0.000168784	0.0440837	9.35235e-06	0.000200305	0
Viral_bacteria__Podoviridae P22virus__Salmonella phage g341c	4.72224e-06	0	2.02534e-05	1.65369e-05	0	0	0	1.78981e-05	5.28109e-05	2.25045e-05	0.0138371	9.35235e-07	0	6.19976e-05
Viral_bacteria__Podoviridae P22virus__Salmonella phage HK620	1.04939e-05	0	5.06334e-05	5.51228e-06	2.5752e-05	2.50865e-05	0.00108351	5.7274e-05	0.00149191	4.50091e-05	6.20898e-05	1.49638e-05	6.25955e-05	0
Viral_bacteria__Podoviridae P22virus__Salmonella phage SE1	0	0	0	5.51228e-06	0	0	0	0	0.000448892	0	6.20898e-05	0	3.75573e-05	0
Viral_bacteria__Podoviridae P22virus__Salmonella phage ST160	0	0	0	0	0	0	0	3.40064e-05	0	0	0.0183342	0	0	0
Viral_bacteria__Podoviridae P22virus__Salmonella phage ST64T	0	0	0	0	0	0	0	1.61083e-05	0	0	0.00757495	0	0	0
Viral_bacteria__Podoviridae P22virus__Salmonella phage vB_SemP_Emek	7.8704e-06	0	4.05067e-05	0	0	0	0	0	0.000264054	0	0	0	0	0
Viral_bacteria__Podoviridae P22virus__Shigella phage Sf6	4.09261e-05	6.39304e-06	0.000111394	9.37088e-05	0	0	0.000154787	5.36944e-06	0.00133347	0.000303811	3.54799e-05	0	0.00013771	8.26634e-05
Viral_bacteria__Podoviridae P68virus__Staphylococcus phage 44AHJD	0	0	1.01267e-05	0	0	0	0	0	2.64054e-05	0	0	0	0	0.000123995
Viral_bacteria__Podoviridae P68virus__Staphylococcus phage GRCS	0	0	0	0	0	0	0	0	1.32027e-05	0	0	0	0	0.000103329
Viral_bacteria__Podoviridae Pagevirus__Bacillus virus Page	1.57408e-06	0	0	5.51228e-06	2.5752e-05	2.50865e-05	0.000309574	7.15925e-06	0.000198041	0.00010127	0.000745077	1.5899e-05	0.000813741	0
Viral_bacteria__Podoviridae Pagevirus__Bacillus virus Palmer	0	0	1.01267e-05	0	5.15039e-05	0.000376298	0.00263138	3.57962e-06	1.32027e-05	2.25045e-05	8.86997e-06	9.35235e-06	0.000488245	0
Viral_bacteria__Podoviridae Pagevirus__Bacillus virus Pascal	0	0	0	5.51228e-06	0.000103008	0.000526818	7.73934e-05	5.36944e-06	5.28109e-05	0.000236298	6.20898e-05	2.24456e-05	0.000613435	0
Viral_bacteria__Podoviridae Pagevirus__Bacillus virus Pookie	0	0	1.01267e-05	5.51228e-06	2.5752e-05	0	0.000154787	0	0	0	0	9.35235e-07	0	0
Viral_bacteria__Podoviridae Phi29virus__Bacillus virus B103	0	0	0	5.51228e-06	0.00123609	0.0120666	0.00139308	1.78981e-05	0.00224446	0.000933938	0.00672343	0.000122516	0.00955207	0
Viral_bacteria__Podoviridae Phi29virus__Bacillus virus GA1	5.24693e-07	0	0	5.51228e-06	0.00265245	0.00677337	0.00178005	0.000110968	0.00567717	0.0742987	0.0203566	0.000225392	0.0273667	0
Viral_bacteria__Podoviridae Phi29virus__Bacillus virus phi29	1.57408e-06	0	0	5.51228e-06	0.00180264	0.0172094	0.00224441	0.000295319	0.00566396	0.0022167	0.00627107	0.000182371	0.0140965	0
Viral_bacteria__Podoviridae Phieco32virus__Cronobacter phage vB_CsaP_GAP52	5.24693e-06	0	4.05067e-05	2.75614e-05	0	0	0.000154787	3.57962e-06	0.000910987	0.00106897	5.32198e-05	1.87047e-06	0.000125191	6.19976e-05
Viral_bacteria__Podoviridae Phikmvvirus__Burkholderia phage JG068	0	0	0	0	0	0	0	1.78981e-06	2.64054e-05	1.12523e-05	3.54799e-05	0	0.000212825	0
Viral_bacteria__Podoviridae Phikmvvirus__Pseudomonas virus LKA1	0	0	0	0	0	0	0	0	0.000105622	1.12523e-05	0	0	0	4.13317e-05
Viral_bacteria__Podoviridae Phikmvvirus__Ralstonia phage RSB3	5.24693e-07	0	0	0	0	0	0	0	2.64054e-05	0.000168784	0	0	0	2.06659e-05
Viral_bacteria__Podoviridae Pocjvirus__Shigella virus POCJ13	6.29632e-06	0	0	0	0	5.01731e-05	0.00046436	0	3.96081e-05	0.000866424	6.20898e-05	0.000143091	0.000250382	2.06659e-05
Viral_bacteria__Podoviridae Podoviridae_Unclassified__Acinetobacter phage Bphi-B1251	3.72532e-05	0	1.01267e-05	3.30737e-05	2.5752e-05	7.52596e-05	0	8.94906e-06	1.32027e-05	0	0.000266099	2.8057e-06	2.50382e-05	0.000123995
Viral_bacteria__Podoviridae Podoviridae_Unclassified__Actinomyces phage Av-1	1.04939e-06	0	0	0	0.000721055	0.00509257	0.00247659	0.00038123	0.0191967	0.00676261	0.00888771	0.000144026	0.012807	0.000165327
Viral_bacteria__Podoviridae Podoviridae_Unclassified__Acyrthosiphon pisum secondary endosymbiont phage 1	6.82101e-06	0	0	0	0	5.01731e-05	0.000309574	0	0.00112223	3.37568e-05	0	0	0.0232855	2.06659e-05
Viral_bacteria__Podoviridae Podoviridae_Unclassified__Alteromonas phage vB_AmaP_AD45-P1	0	0	0	0	0	2.50865e-05	0	0	0.00105622	0	0	0	5.00764e-05	0
Viral_bacteria__Podoviridae Podoviridae_Unclassified__Anabaena phage A-4L	1.04939e-06	0	1.01267e-05	3.30737e-05	0	0	0	5.36944e-06	0.000105622	2.25045e-05	1.77399e-05	0	1.25191e-05	4.13317e-05
Viral_bacteria__Podoviridae Podoviridae_Unclassified__Bacillus phage Aurora	0	0	0	0	0.00025752	0.000602077	7.73934e-05	3.57962e-06	0.00150511	0.000225045	0.0136864	1.21581e-05	0.00985253	0
Viral_bacteria__Podoviridae Podoviridae_Unclassified__Bacillus phage Claudi	0	0	0	0	0	2.50865e-05	0.000154787	0	3.96081e-05	0	0.00421323	1.87047e-06	7.51145e-05	0
Viral_bacteria__Podoviridae Podoviridae_Unclassified__Bacillus phage MG-B1	5.24693e-07	0	0	0	2.5752e-05	0.0050424	0	3.57962e-06	0.000765757	0.000438838	0.00273195	1.5899e-05	0.00580886	0
Viral_bacteria__Podoviridae Podoviridae_Unclassified__Bacillus phage Pavlov	0	0	0	0	2.5752e-05	0	0	0	6.60136e-05	0	0.000141919	0	0	0
Viral_bacteria__Podoviridae Podoviridae_Unclassified__Bacillus phage Stitch	0	0	0	0	0	0.00215744	0	3.57962e-05	5.28109e-05	7.87659e-05	8.86997e-05	0	0.000312977	0
Viral_bacteria__Podoviridae Podoviridae_Unclassified__Bacillus phage VMY22	0	0	0	0	0.00139061	0.00444032	0.00162526	0.000843001	0.00393441	0.00702141	0.00309562	0.000109422	0.00677283	0
Viral_bacteria__Podoviridae Podoviridae_Unclassified__Cellulophaga phage phi13:2	0	0	0	0	2.5752e-05	0	0	7.15925e-06	2.64054e-05	1.12523e-05	6.20898e-05	3.08628e-05	0.000162748	0
Viral_bacteria__Podoviridae Podoviridae_Unclassified__Cellulophaga phage phi14:2	1.52161e-05	2.55722e-05	0.00012152	0.000325225	0.000180264	0.000125433	0.000773934	5.36944e-05	0.00586201	0.00941815	0.000745077	6.54664e-06	0.000788703	0.000826634
Viral_bacteria__Podoviridae Podoviridae_Unclassified__Cellulophaga phage phi18:3	0	0	1.01267e-05	2.75614e-05	0.00154512	0	0.00170265	5.7274e-05	0.00278577	0.00010127	0.00279404	0.000519991	0.000475725	0
Viral_bacteria__Podoviridae Podoviridae_Unclassified__Cellulophaga phage phi19:3	0	0	0	0	0	0	0	0	0.000330068	1.12523e-05	0	0	0.000788703	0
Viral_bacteria__Podoviridae Podoviridae_Unclassified__Cellulophaga phage phi38:1	2.09877e-06	0	3.03801e-05	1.10246e-05	0	0	0.00023218	1.78981e-06	0.000805366	0.000191288	0.0018006	3.74094e-06	2.50382e-05	0.00035132
Viral_bacteria__Podoviridae Podoviridae_Unclassified__Cellulophaga phage phi46:3	0	0	0	5.51228e-06	5.15039e-05	0.000200692	0.000154787	5.36944e-06	0.00216525	4.50091e-05	0.0168618	6.54664e-06	0.000938932	0
Viral_bacteria__Podoviridae Podoviridae_Unclassified__Clostridium phage phi24R	0	0	0	5.51228e-06	0.000618047	0.000150519	0.00046436	5.36944e-06	0.000198041	0.000146279	0.00272308	1.87047e-05	0.0132577	0
Viral_bacteria__Podoviridae Podoviridae_Unclassified__Clostridium phage phiCP7R	0	0	0	0	0	2.50865e-05	0	1.78981e-06	0.000343271	2.25045e-05	0	6.54664e-06	0.000300458	0
Viral_bacteria__Podoviridae Podoviridae_Unclassified__Cronobacter phage Dev-CD-23823	0	0	0	0	0	0	0	0	6.60136e-05	0.000607622	0	0	0	0
Viral_bacteria__Podoviridae Podoviridae_Unclassified__Enterobacter phage Tyrion	8.91978e-06	0	0	0	2.5752e-05	0.000100346	0.000696541	1.07389e-05	0.000382879	0.000225045	9.75696e-05	0	0.00684794	0
Viral_bacteria__Podoviridae Podoviridae_Unclassified__Enterobacteria phage Sf101	2.62347e-06	0	0	0	0	0	0	1.78981e-06	3.96081e-05	0.00010127	1.77399e-05	0	0	0
Viral_bacteria__Podoviridae Podoviridae_Unclassified__Enterobacteria phage VT2phi_272	2.78087e-05	0	6.07601e-05	3.30737e-05	2.5752e-05	0	0	7.15925e-06	0.000198041	2.25045e-05	0	9.35235e-07	5.00764e-05	0
Viral_bacteria__Podoviridae Podoviridae_Unclassified__Enterococcus phage vB_Efae230P-4	0	0	0	5.51228e-06	7.72559e-05	0	0	0	3.96081e-05	0.000157532	5.32198e-05	1.96399e-05	0	0
Viral_bacteria__Podoviridae Podoviridae_Unclassified__Enterococcus phage vB_IME195	5.24693e-07	6.39304e-06	0	0	0	0	0	1.78981e-06	0	0.000483847	0	9.35235e-07	0	0
Viral_bacteria__Podoviridae Podoviridae_Unclassified__Erwinia phage PEp14	5.24693e-06	1.27861e-05	6.07601e-05	0.000165369	0.000180264	0.000175606	0.00123829	9.486e-05	0.00128066	0.00103521	0.000549938	9.35235e-06	0.00055084	2.06659e-05
Viral_bacteria__Podoviridae Podoviridae_Unclassified__Escherichia phage P13374	0	0	0	0	0	0	7.73934e-05	0	7.92163e-05	0.0029931	6.20898e-05	1.77695e-05	0.000100153	0
Viral_bacteria__Podoviridae Podoviridae_Unclassified__Escherichia phage Pollock	1.57408e-06	0	0	5.51228e-06	0.00012876	0	0	7.15925e-06	7.92163e-05	1.12523e-05	0	0	0	0
Viral_bacteria__Podoviridae Podoviridae_Unclassified__Gordonia phage GMA3	0	0	0	0	2.5752e-05	0	0.00193483	0	1.32027e-05	1.12523e-05	3.54799e-05	9.35235e-07	0	2.06659e-05
Viral_bacteria__Podoviridae Podoviridae_Unclassified__Gordonia phage GTE8	0	0	0	0	0	0	7.73934e-05	1.78981e-06	0	1.12523e-05	0	9.35235e-07	0.000150229	0
Viral_bacteria__Podoviridae Podoviridae_Unclassified__Lactococcus phage KSY1	0	0	0	0	0	0	0	3.57962e-06	0.00381558	0	0.000345929	9.35235e-07	0	0.000165327
Viral_bacteria__Podoviridae Podoviridae_Unclassified__Liberibacter phage SC2	2.09877e-06	0	0	0	5.15039e-05	0.0145251	0.00023218	0	3.96081e-05	0.000123775	0	0.000291793	0.000525802	0
Viral_bacteria__Podoviridae Podoviridae_Unclassified__Mesorhizobium phagevB_MloP_Lo5R7ANS	2.09877e-06	0	3.03801e-05	1.10246e-05	0	0	0	0	0.000118824	3.37568e-05	0.000239489	9.35235e-07	0	0
Viral_bacteria__Podoviridae Podoviridae_Unclassified__Mycobacterium phage Phlei	5.24693e-07	0	0	0	5.15039e-05	2.50865e-05	0.000773934	3.57962e-06	1.32027e-05	2.25045e-05	2.66099e-05	0	0.000513283	2.06659e-05
Viral_bacteria__Podoviridae Podoviridae_Unclassified__Myxococcus phage Mx8	5.24693e-07	6.39304e-06	0	5.51228e-06	0.00025752	2.50865e-05	0.000541754	0	1.32027e-05	1.12523e-05	5.32198e-05	1.87047e-06	2.50382e-05	0
Viral_bacteria__Podoviridae Podoviridae_Unclassified__Pectobacterium phage Peat1	0	0	0	0	0	0	0.000386967	0	0	0	0	0	0	0
Viral_bacteria__Podoviridae Podoviridae_Unclassified__Pectobacterium phage PP90	0	0	0	0	0	0	0.000928721	0	0	0.000708893	2.66099e-05	0	8.76336e-05	0
Viral_bacteria__Podoviridae Podoviridae_Unclassified__Pelagibacter phage HTVC011P	0	0	0	0	0	2.50865e-05	0	0	0	0	8.86997e-06	0	0.000726107	0
Viral_bacteria__Podoviridae Podoviridae_Unclassified__Planktothrix phage PaV-LD	6.61113e-05	3.83583e-05	0.000658235	0.00108592	0.00110733	0.00225779	0.00650104	0.000148554	0.00304983	0.00436588	0.00282065	0.000125321	0.00623451	0.00144661
Viral_bacteria__Podoviridae Podoviridae_Unclassified__Pseudomonas phage AF	1.57408e-06	0	1.01267e-05	5.51228e-06	0	2.50865e-05	7.73934e-05	7.15925e-06	0.00155792	0	0.000212879	8.41711e-06	0.000125191	2.06659e-05
Viral_bacteria__Podoviridae Podoviridae_Unclassified__Puniceispirillum phage HMO-2011	0	0	3.03801e-05	0	0	0	0	1.78981e-06	0.000211243	3.37568e-05	0.0070871	0	2.50382e-05	0
Viral_bacteria__Podoviridae Podoviridae_Unclassified__Ralstonia phage RSJ2	0	0	0	0	0	0	0	0	0	0.000112523	0	0	0	0
Viral_bacteria__Podoviridae Podoviridae_Unclassified__Ralstonia phage RSJ5	0	0	0	0	0.000231768	0.000275952	0	0	1.32027e-05	9.00181e-05	8.86997e-06	1.49638e-05	0.000100153	4.13317e-05
Viral_bacteria__Podoviridae Podoviridae_Unclassified__Ralstonia phage RSK1	0	0	2.02534e-05	0	0	0	7.73934e-05	0	0	0.000135027	4.43498e-05	0	0	0
Viral_bacteria__Podoviridae Podoviridae_Unclassified__Rhodoferax phage P26218	1.04939e-06	0	0	0	0	0	7.73934e-05	0	0.000277257	0	0	0	1.25191e-05	0
Viral_bacteria__Podoviridae Podoviridae_Unclassified__Salmonella Phage 103203_sal5	5.24693e-07	0	0	0	0	0	0	0	0.00029046	1.12523e-05	0	0	0	0
Viral_bacteria__Podoviridae Podoviridae_Unclassified__Salmonella phage 7-11	0	0	0	5.51228e-06	0	0	0	0	0.000382879	1.12523e-05	4.43498e-05	0	6.25955e-05	0
Viral_bacteria__Podoviridae Podoviridae_Unclassified__Salmonella phage SEN22	3.67285e-06	0	0	0	0	0	0.000309574	0	7.92163e-05	2.25045e-05	0.000212879	1.87047e-06	2.50382e-05	0
Viral_bacteria__Podoviridae Podoviridae_Unclassified__Salmonella phage SEN34	3.67285e-06	0	2.02534e-05	0	2.5752e-05	2.50865e-05	0.00023218	0	1.32027e-05	0	0	1.87047e-06	0	0
Viral_bacteria__Podoviridae Podoviridae_Unclassified__Streptococcus phage A25	0.00452181	0	0	0	2.5752e-05	0	7.73934e-05	2.68472e-05	9.2419e-05	0.000258802	0.000408018	9.35235e-07	0.000513283	4.13317e-05
Viral_bacteria__Podoviridae Podoviridae_Unclassified__Streptococcus phage Str-PAP-1	0.00293303	0	0	0	0.000283272	5.01731e-05	0.00340531	0.00094681	0.00503023	0.000180036	0.0013571	4.3956e-05	0.000200305	4.13317e-05
Viral_bacteria__Podoviridae Podoviridae_Unclassified__Streptococcus phage T12	7.39817e-05	0	0	1.65369e-05	0.00012876	2.50865e-05	0.00100611	6.98027e-05	0.0048454	0.000180036	0.00592514	2.8057e-05	0.00528306	6.19976e-05
Viral_bacteria__Podoviridae Podoviridae_Unclassified__Synechococcus phage P60	0	0	0	0	0	5.01731e-05	0	0	1.32027e-05	0.000157532	8.86997e-06	0.000565817	5.00764e-05	0
Viral_bacteria__Podoviridae Podoviridae_Unclassified__Thalassomonas phage BA3	1.04939e-06	0	0	5.51228e-06	0	0	7.73934e-05	2.14777e-05	0.000118824	0	0	0	0	0
Viral_bacteria__Podoviridae Podoviridae_Unclassified__Vibrio phage CHOED	0	0	0	5.51228e-06	7.72559e-05	2.50865e-05	0.000154787	7.15925e-06	5.28109e-05	2.25045e-05	0.000319319	1.87047e-06	1.25191e-05	0
Viral_bacteria__Podoviridae Podoviridae_Unclassified__Vibrio phage ICP2	0	0	0	0	0	5.01731e-05	0.000309574	0	5.28109e-05	0.000202541	2.66099e-05	0.000377835	2.50382e-05	0
Viral_bacteria__Podoviridae Podoviridae_Unclassified__Vibrio phage ICP2_2013_A_Haiti	0	0	0	0	0	0.000225779	7.73934e-05	0	2.64054e-05	0	1.77399e-05	1.12228e-05	0.000125191	0
Viral_bacteria__Podoviridae Podoviridae_Unclassified__Vibrio phage phi 1	0	0	0	5.51228e-06	0	0	0	0	0	0.000753902	1.77399e-05	0	1.25191e-05	0
Viral_bacteria__Podoviridae Podoviridae_Unclassified__Vibrio phage PVA1	0	0	0	0	0	0	0.000154787	0	0	0	0	0	0	0
Viral_bacteria__Podoviridae Podoviridae_Unclassified__Vibrio phage VvAW1	3.14816e-06	1.27861e-05	7.08868e-05	0.000248053	0.000154512	0.000125433	0.00178005	0.000103809	0.00151831	0.00158657	0.000700727	4.67617e-06	0.00041313	6.19976e-05
Viral_bacteria__Podoviridae Podoviridae_Unclassified__Weissella phage phiYS61	0	0	0	0	0	2.50865e-05	7.73934e-05	0	0.000250852	0.000135027	7.09597e-05	3.55389e-05	5.00764e-05	0
Viral_bacteria__Podoviridae Podoviridae_Unclassified__Xanthomonas citri phage CP2	5.24693e-07	6.39304e-06	1.01267e-05	0	0	0.016808	0.000773934	0	0.000105622	0.00127151	7.98297e-05	2.05752e-05	0.00142718	0
Viral_bacteria__Podoviridae Podoviridae_Unclassified__Xylella phage Xfas53	1.04939e-06	0	1.01267e-05	5.51228e-06	0	0	0	3.57962e-06	9.2419e-05	3.37568e-05	0.000221749	9.35235e-07	1.25191e-05	0
Viral_bacteria__Podoviridae Prtbvirus__Brucella virus Pr	3.14816e-06	0	0	0	0	0	0.000154787	0	0	0	0	5.61141e-06	0	2.06659e-05
Viral_bacteria__Podoviridae Sp6virus__Escherichia virus K1-5	0	0	5.06334e-05	0.000567765	0	0	0	0	5.28109e-05	1.12523e-05	8.86997e-06	0	5.00764e-05	0
Viral_bacteria__Podoviridae T7virus__Erwinia phage vB_EamP-L1	1.04939e-06	0	0	5.51228e-06	0	0	0.000154787	0	7.92163e-05	4.50091e-05	1.77399e-05	9.35235e-07	0	0
Viral_bacteria__Podoviridae Una961virus__Helicobacter virus KHP30	0	0	0	0	0	0	0	0	2.64054e-05	0.000270054	0	1.21581e-05	2.50382e-05	0
Viral_bacteria__Podoviridae Una961virus__Helicobacter virus KHP40	0	0	0	5.51228e-06	0	0	0	0	3.96081e-05	0.00024755	0	9.35235e-07	0	0
Viral_bacteria__Prochlorococcus phage Syn1 Prochlorococcus phage Syn1_Unclassified__Prochlorococcus phage Syn1	1.57408e-06	6.39304e-06	1.01267e-05	2.20491e-05	2.5752e-05	0	0.000154787	1.61083e-05	0.000118824	6.75136e-05	0.000150789	0	8.76336e-05	2.06659e-05
Viral_bacteria__Propionibacterium phage PFR1 Propionibacterium phage PFR1_Unclassified__Propionibacterium phage PFR1	3.67285e-06	0	1.01267e-05	6.06351e-05	2.5752e-05	5.01731e-05	0.000851327	2.8637e-05	0.000792163	0.000146279	0.000638638	3.74094e-06	0.000237863	0.000330654
Viral_bacteria__Pseudomonas phage O4 Pseudomonas phage O4_Unclassified__Pseudomonas phage O4	0	0	0	1.10246e-05	0.00115884	2.50865e-05	7.73934e-05	0	0.000132027	1.12523e-05	0	0.000265607	0.000338015	0
Viral_bacteria__Pseudomonas phage PA11 Pseudomonas phage PA11_Unclassified__Pseudomonas phage PA11	0	0	0	5.51228e-06	0	0	0	0	0.000237649	1.12523e-05	0	0	0	0
Viral_bacteria__Pseudomonas phage vB_PaeP_Tr60_Ab31 Pseudomonas phage vB_PaeP_Tr60_Ab31_Unclassified__Pseudomonas phage vB_PaeP_Tr60_Ab31	0	0	1.01267e-05	2.20491e-05	0	0	0	3.57962e-06	0.000607325	0	0.000239489	3.74094e-06	2.50382e-05	0
Viral_bacteria__Rhizobium phage RHEph10 Rhizobium phage RHEph10_Unclassified__Rhizobium phage RHEph10	8.91978e-06	1.91791e-05	6.07601e-05	2.75614e-05	0.000283272	0.000250865	0.000154787	5.36944e-06	0.000211243	0.000607622	9.75696e-05	4.30208e-05	0.000438168	2.06659e-05
Viral_bacteria__Rhodobacter phage RcapNL Rhodobacter phage RcapNL_Unclassified__Rhodobacter phage RcapNL	1.04939e-06	0	2.02534e-05	1.65369e-05	0	0.000175606	0.00185744	5.36944e-06	3.96081e-05	0.000382577	0.00321093	6.54664e-06	0.0036055	2.06659e-05
Viral_bacteria__Rhodococcus phage REQ3 Rhodococcus phage REQ3_Unclassified__Rhodococcus phage REQ3	5.24693e-07	0	0	5.51228e-06	0	0	0.000619147	1.78981e-06	0.000224446	0	1.77399e-05	9.35235e-07	1.25191e-05	0.000123995
Viral_bacteria__Salicola phage CGphi29 Salicola phage CGphi29_Unclassified__Salicola phage CGphi29	1.04939e-06	0	0	1.10246e-05	7.72559e-05	2.50865e-05	7.73934e-05	1.78981e-06	0.000171635	0.000630127	7.09597e-05	1.87047e-06	0	0
Viral_bacteria__Salisaeta icosahedral phage 1 Salisaeta icosahedral phage 1_Unclassified__Salisaeta icosahedral phage 1	1.04939e-06	0	3.03801e-05	1.10246e-05	0.000386279	0.000175606	0	0	1.32027e-05	1.12523e-05	0.000186269	2.24456e-05	1.25191e-05	0
Viral_bacteria__Salmonella phage 118970_sal3 Salmonella phage 118970_sal3_Unclassified__Salmonella phage 118970_sal3	1.04939e-05	0	0	1.10246e-05	0	0	0	0	0.000356473	0	0	0	0	0
Viral_bacteria__Salmonella phage BP63 Salmonella phage BP63_Unclassified__Salmonella phage BP63	2.62347e-06	0	0	1.65369e-05	2.5752e-05	2.50865e-05	7.73934e-05	0	0.000171635	3.37568e-05	3.54799e-05	0	3.75573e-05	0
Viral_bacteria__Sinorhizobium phage PBC5 Sinorhizobium phage PBC5_Unclassified__Sinorhizobium phage PBC5	3.14816e-06	6.39304e-06	3.03801e-05	0.00012127	0	0.000100346	0.000154787	1.43185e-05	0.000792163	0.000292559	0.000221749	3.74094e-06	0.000112672	0
Viral_bacteria__Siphoviridae Ab18virus__Pseudomonas virus Ab18	2.09877e-06	0	2.02534e-05	5.51228e-05	2.5752e-05	5.01731e-05	0.00023218	1.43185e-05	0.000343271	5.62613e-05	0.000150789	0	0.000225344	0.000309988
Viral_bacteria__Siphoviridae Ab18virus__Pseudomonas virus PaMx11	5.77162e-06	0	6.07601e-05	7.7172e-05	0	7.52596e-05	0.000309574	1.61083e-05	0.000369676	5.62613e-05	0.00010644	1.87047e-06	0.000125191	0.000557978
Viral_bacteria__Siphoviridae Andromedavirus__Bacillus virus Andromeda	0	0	0	2.75614e-05	0.000566543	0.000777683	0	1.78981e-06	0.000105622	0.000517604	1.77399e-05	0.000113163	3.75573e-05	0
Viral_bacteria__Siphoviridae Andromedavirus__Bacillus virus Blastoid	5.24693e-07	0	0	5.51228e-06	0	0	0	0	1.32027e-05	0.000135027	8.86997e-06	0	1.25191e-05	0
Viral_bacteria__Siphoviridae Andromedavirus__Bacillus virus Eoghan	0	0	0	1.10246e-05	0.000206016	0	0.000154787	1.78981e-06	2.64054e-05	2.25045e-05	2.66099e-05	9.35235e-07	1.25191e-05	2.06659e-05
Viral_bacteria__Siphoviridae Andromedavirus__Bacillus virus Finn	0	0	1.01267e-05	5.51228e-06	2.5752e-05	7.52596e-05	0	0	1.32027e-05	3.37568e-05	0	0	0.000212825	0
Viral_bacteria__Siphoviridae Andromedavirus__Bacillus virus Riggi	0	0	0	0	0	0.000175606	0	0	0	0	1.77399e-05	0	3.75573e-05	0
Viral_bacteria__Siphoviridae Bernal13virus__Mycobacterium virus Bernal13	5.24693e-07	1.27861e-05	0	0	0	0	7.73934e-05	3.57962e-06	0.000316865	0	0.000159659	1.96399e-05	5.00764e-05	0.000268656
Viral_bacteria__Siphoviridae Biseptimavirus__Staphylococcus phage 13	1.04939e-06	0	3.03801e-05	2.75614e-05	2.5752e-05	0	0.00108351	3.57962e-06	0.000409284	9.00181e-05	6.20898e-05	4.67617e-06	5.00764e-05	0.000103329
Viral_bacteria__Siphoviridae Biseptimavirus__Staphylococcus phage 77	4.77471e-05	0	1.01267e-05	1.65369e-05	0.000206016	0.000250865	0.000154787	5.36944e-06	0.000198041	0.000180036	0.00010644	1.96399e-05	0.000100153	6.19976e-05
Viral_bacteria__Siphoviridae Biseptimavirus__Staphylococcus phage Pvl108	9.44448e-06	4.47513e-05	0.000141774	0.00043547	0.000154512	0.000200692	0.00131569	3.04268e-05	0.00141269	0.00010127	0.000159659	2.8057e-06	0.000876336	0.000743971
Viral_bacteria__Siphoviridae Bronvirus__Mycobacterium phage bron	5.24693e-07	0	0	0	0	0.000125433	0	0	0.00153151	4.50091e-05	0.000487848	9.35235e-07	5.00764e-05	0
Viral_bacteria__Siphoviridae Bronvirus__Mycobacterium phage Faith1	0	0	0	0	0	2.50865e-05	0	5.36944e-06	3.96081e-05	1.12523e-05	0.000381409	9.35235e-07	0	0
Viral_bacteria__Siphoviridae C2virus__Lactococcus phage D4410	1.52161e-05	0	1.01267e-05	0	0	0	0	0.00521193	0.0004885	3.37568e-05	0	0	0	0
Viral_bacteria__Siphoviridae C2virus__Lactococcus phage D4412	5.24693e-07	0	0	0	0	0	0	0.000340064	7.92163e-05	2.25045e-05	0	0	1.25191e-05	2.06659e-05
Viral_bacteria__Siphoviridae C2virus__Lactococcus phage M5938	3.14816e-06	0	0	0	0	0	0	0.00185603	0.000382879	5.62613e-05	0	0	0	0
Viral_bacteria__Siphoviridae C2virus__Lactococcus phage M6162	5.24693e-07	0	0	0	0	0	0	0.0001933	2.64054e-05	0	0	0	0	0
Viral_bacteria__Siphoviridae C2virus__Lactococcus phage M6165	4.19754e-06	0	0	0	0	0	0	0.00113653	0.000171635	0	8.86997e-06	0	0	0
Viral_bacteria__Siphoviridae C2virus__Lactococcus virus bIL67	8.39509e-06	0	1.01267e-05	5.51228e-06	0	0	0	0.0025129	0.00014523	1.12523e-05	0	0	0	0
Viral_bacteria__Siphoviridae C2virus__Lactococcus virus c2	4.72224e-06	0	1.01267e-05	0	0	0	0	0.00188109	0.000330068	4.50091e-05	0	0	0	0
Viral_bacteria__Siphoviridae C5virus__Lactobacillus virus c5	5.87656e-05	0	0	1.65369e-05	0.00213741	0.000326125	0.00046436	0.000139605	0.0019408	0.000202541	0.000603158	0.000185177	0.000863817	2.06659e-05
Viral_bacteria__Siphoviridae C5virus__Lactobacillus virus Ld17	1.04939e-06	0	0	5.51228e-06	0.000180264	0	0.000541754	2.68472e-05	7.92163e-05	4.50091e-05	0.0022441	4.67617e-05	0.000212825	4.13317e-05
Viral_bacteria__Siphoviridae C5virus__Lactobacillus virus Ld25A	0	0	0	5.51228e-06	2.5752e-05	2.50865e-05	0.000928721	4.47453e-05	0.00014523	5.62613e-05	0.000195139	7.48188e-06	0.000100153	2.06659e-05
Viral_bacteria__Siphoviridae C5virus__Lactobacillus virus Ld3	0	0	0	0	0	0	0.00023218	1.07389e-05	3.96081e-05	0.0014853	2.66099e-05	9.35235e-07	0.000312977	0
Viral_bacteria__Siphoviridae C5virus__Lactobacillus virus LLKu	0	0	0	0	0	5.01731e-05	0.000928721	1.61083e-05	0.000132027	9.00181e-05	0.000168529	6.54664e-06	8.76336e-05	2.06659e-05
Viral_bacteria__Siphoviridae C5virus__Lactobacillus virus phiLdb	4.19754e-06	6.39304e-06	1.01267e-05	5.51228e-06	2.5752e-05	0.000476644	0.00131569	3.40064e-05	0.00063373	0.000157532	0.00118858	2.15104e-05	0.00699817	0
Viral_bacteria__Siphoviridae Cba181virus__Cellulophaga virus Cba121	0	6.39304e-06	0	5.51228e-06	2.5752e-05	0.000627164	0	5.36944e-06	2.64054e-05	1.12523e-05	0.00012418	6.54664e-06	0.000212825	0
Viral_bacteria__Siphoviridae Cba181virus__Cellulophaga virus Cba171	0	6.39304e-06	2.02534e-05	0	5.15039e-05	5.01731e-05	0	0	2.64054e-05	2.25045e-05	0.000257229	1.21581e-05	0.00110168	0
Viral_bacteria__Siphoviridae Cba181virus__Cellulophaga virus Cba181	0	0	0	5.51228e-06	0.00218892	7.52596e-05	0.000928721	1.78981e-06	0.00202002	6.75136e-05	0.000141919	0.000248773	0.000200305	0
Viral_bacteria__Siphoviridae Cbastvirus__Cellulophaga virus ST	5.24693e-07	0	2.02534e-05	5.51228e-06	5.15039e-05	0.000100346	0.000619147	3.57962e-05	0.000343271	3.37568e-05	0.0015345	0.000125321	0.000388092	4.13317e-05
Viral_bacteria__Siphoviridae Cecivirus__Bacillus virus 250	1.57408e-06	1.27861e-05	0	5.51228e-06	0.000360527	0.000426471	0.00100611	0.00182561	0.000554514	9.00181e-05	0.001978	0.000490998	0.00395603	2.06659e-05
Viral_bacteria__Siphoviridae Cecivirus__Bacillus virus IEBH	3.72532e-05	0	0	5.51228e-06	0.000154512	0.000225779	0.000154787	1.61083e-05	0.000171635	3.37568e-05	5.32198e-05	3.64742e-05	1.25191e-05	0
Viral_bacteria__Siphoviridae Che8virus__Mycobacterium phage Avani	1.04939e-06	0	0	1.10246e-05	0.000206016	0.000426471	0.000773934	1.78981e-05	0.000158433	0.000483847	2.66099e-05	1.87047e-06	0.000375573	0
Viral_bacteria__Siphoviridae Che8virus__Mycobacterium phage Boomer	0	0	0	0	0	0	0	0	0.00029046	1.12523e-05	1.77399e-05	3.74094e-06	2.50382e-05	0
Viral_bacteria__Siphoviridae Che8virus__Mycobacterium phage Che9d	0	0	0	0	0	0	0.00023218	0	0	0	8.86997e-06	0	0	0
Viral_bacteria__Siphoviridae Chivirus__Salmonella phage FSLSP088	0	0	0	0	0	0	0	0	0.000105622	0	1.77399e-05	0	1.25191e-05	0
Viral_bacteria__Siphoviridae Cjw1virus__Mycobacterium phage Cjw1	7.3457e-06	6.39304e-06	3.03801e-05	5.51228e-06	5.15039e-05	7.52596e-05	7.73934e-05	3.04268e-05	0.000422487	0.00145154	0.000505588	6.17255e-05	0.00101405	0.00035132
Viral_bacteria__Siphoviridae Cjw1virus__Mycobacterium phage Kostya	6.82101e-06	1.91791e-05	5.06334e-05	7.7172e-05	5.15039e-05	0.000150519	0.000154787	1.07389e-05	0.000224446	0.000832668	0.000239489	3.74094e-05	0.000788703	0.00035132
Viral_bacteria__Siphoviridae D3112virus__Pseudomonas phage MP22	0	0	0	0	0	0	0	0	0.000264054	0	8.86997e-06	9.35235e-07	0	0
Viral_bacteria__Siphoviridae D3virus__Pseudomonas phage D3	2.09877e-06	0	7.08868e-05	3.30737e-05	0.00012876	0	7.73934e-05	5.36944e-06	0.000330068	0.000123775	0.000292709	1.12228e-05	0.000262901	0.000185993
Viral_bacteria__Siphoviridae D3virus__Pseudomonas phage PMG1	0	0	1.01267e-05	1.65369e-05	0	0	0	0	3.96081e-05	1.12523e-05	0.000585418	0	0	0
Viral_bacteria__Siphoviridae Demosthenesvirus__Gordonia virus Demosthenes	0	0	0	0	0	0.000827856	0	0	0	3.37568e-05	8.86997e-06	0	8.76336e-05	0
Viral_bacteria__Siphoviridae Demosthenesvirus__Gordonia virus Kvothe	0	0	0	0	0	0.0348452	7.73934e-05	0	0	0.000146279	1.77399e-05	0	0.00102657	0
Viral_bacteria__Siphoviridae E125virus__Burkholderia virus phi1026b	5.24693e-07	0	2.02534e-05	2.75614e-05	7.72559e-05	7.52596e-05	0.000619147	1.61083e-05	0.000316865	4.50091e-05	0.000274969	9.35235e-07	0.00013771	6.19976e-05
Viral_bacteria__Siphoviridae E125virus__Burkholderia virus phi6442	3.67285e-06	0	6.07601e-05	2.20491e-05	0	0	7.73934e-05	3.57962e-06	0.000118824	3.37568e-05	4.43498e-05	9.35235e-07	1.25191e-05	4.13317e-05
Viral_bacteria__Siphoviridae E125virus__Burkholderia virus phiE125	4.19754e-06	0	7.08868e-05	4.40983e-05	0	0	7.73934e-05	3.57962e-06	0.000250852	3.37568e-05	3.54799e-05	0	2.50382e-05	0.000206659
Viral_bacteria__Siphoviridae Eiauvirus__Edwardsiella virus eiAU	0	0	0	0	0	0	0	0	0.00014523	0	0	0	1.25191e-05	0
Viral_bacteria__Siphoviridae Ff47virus__Mycobacterium virus Ff47	0	0	2.02534e-05	1.10246e-05	0.00012876	0.000576991	0.00340531	2.14777e-05	0.000646933	3.37568e-05	6.20898e-05	2.24456e-05	0.00862565	0
Viral_bacteria__Siphoviridae Ff47virus__Mycobacterium virus Muddy	0	0	0	0	0	2.50865e-05	0.00170265	0	3.96081e-05	1.12523e-05	8.86997e-06	1.87047e-06	5.00764e-05	0
Viral_bacteria__Siphoviridae Gaiavirus__Mycobacterium virus Gaia	4.19754e-06	1.27861e-05	4.05067e-05	8.81965e-05	5.15039e-05	0.000100346	0.00286356	1.96879e-05	0.000646933	0.000123775	0.000461238	7.48188e-06	3.75573e-05	0.000165327
Viral_bacteria__Siphoviridae Gilesvirus__Mycobacterium virus Giles	0	0	0	0	0	7.52596e-05	0.00023218	0	0	0	0	0	0	2.06659e-05
Viral_bacteria__Siphoviridae Gordtnkvirus__Gordonia virus GordTnk2	1.57408e-06	6.39304e-06	0	0	0	5.01731e-05	7.73934e-05	7.15925e-06	9.2419e-05	2.25045e-05	0.00782331	0	2.50382e-05	0.000103329
Viral_bacteria__Siphoviridae Harrisonvirus__Paenibacillus virus Harrison	0.00013747	0	0	1.10246e-05	7.72559e-05	0.000401385	0.000619147	2.8637e-05	0.000184838	0.000258802	0.000603158	1.49638e-05	0.00645985	0
Viral_bacteria__Siphoviridae Hk578virus__Escherichia virus HK578	1.04939e-06	4.47513e-05	4.05067e-05	0.000126783	0	0	0	0	0	0	0	0	0	0
Viral_bacteria__Siphoviridae Hk578virus__Shigella virus EP23	6.29632e-06	0.000421941	0.00021266	0.000959137	0	0	0	0	0	0	0	0	0	0
Viral_bacteria__Siphoviridae Jenstvirus__Brevibacillus virus Jenst	3.67285e-06	1.91791e-05	5.06334e-05	7.16597e-05	0.000283272	0.000501731	0.000154787	1.61083e-05	0.000303662	0.00165408	0.000168529	4.02151e-05	0.000425649	2.06659e-05
Viral_bacteria__Siphoviridae Jerseyvirus__Salmonella virus Ent1	1.57408e-06	1.27861e-05	0.000293674	0.00229862	0	0	0	0	0.00029046	2.25045e-05	1.77399e-05	0	1.25191e-05	0
Viral_bacteria__Siphoviridae Jerseyvirus__Salmonella virus f18SE	0	0	0.000253167	0.00146076	0	0	0	0	0	1.12523e-05	8.86997e-06	0	0	6.19976e-05
Viral_bacteria__Siphoviridae Jerseyvirus__Salmonella virus Jersey	7.8704e-06	0.000473085	0.000425321	0.00353337	0	0	0	0	0	0	0	0	1.25191e-05	0
Viral_bacteria__Siphoviridae Jerseyvirus__Salmonella virus L13	0	0	2.02534e-05	0.000154344	0	0	0	0	0	0	0	9.35235e-07	0	0
Viral_bacteria__Siphoviridae Jerseyvirus__Salmonella virus LSPA1	0	0	0.00024304	0.00190725	0	0	0	0	0	1.12523e-05	0	0	0	0
Viral_bacteria__Siphoviridae Jerseyvirus__Salmonella virus SE2	0	0	6.07601e-05	0.000942601	0	0	0	0	0	0	0	0	0	0
Viral_bacteria__Siphoviridae Jerseyvirus__Salmonella virus SETP13	0	0	0.000131647	0.000826843	0	0	0	0	0	0	0	0	0	0
Viral_bacteria__Siphoviridae Jerseyvirus__Salmonella virus SETP3	0	0	1.01267e-05	0.000424446	0	0	7.73934e-05	0	0	0	0	0	0	0
Viral_bacteria__Siphoviridae Jerseyvirus__Salmonella virus SETP7	0	0	7.08868e-05	0.000567765	0	0	0	0	1.32027e-05	0	0	0	0	0
Viral_bacteria__Siphoviridae Jerseyvirus__Salmonella virus SS3e	0	1.27861e-05	3.03801e-05	0.000407909	0	0	0.000309574	0	0	0	0	0	0	0
Viral_bacteria__Siphoviridae K1gvirus__Escherichia virus K1G	1.04939e-06	2.55722e-05	0.00104305	0.00885824	0	0	7.73934e-05	0	1.32027e-05	1.12523e-05	1.77399e-05	0	0	0
Viral_bacteria__Siphoviridae K1gvirus__Escherichia virus K1H	0	0	0.000283547	0.00182457	0	0	0	0	0	0	0	0	0	0
Viral_bacteria__Siphoviridae Kp36virus__Klebsiella virus 1513	3.77779e-05	0.0015663	0.000637981	0.00402948	0	0	0	0	1.32027e-05	0	0	0	0	6.19976e-05
Viral_bacteria__Siphoviridae Kp36virus__Klebsiella virus KLPN1	1.62655e-05	0.000600946	0.000202534	0.00141666	0	0	0	0	0	0	0	0	0	0
Viral_bacteria__Siphoviridae Kp36virus__Klebsiella virus KP36	3.14816e-06	0.000383583	0.000111394	0.000529179	0	0	0	0	0	0	0	0	0	0
Viral_bacteria__Siphoviridae Kp36virus__Klebsiella virus PKP126	1.99383e-05	0.000831096	0.000283547	0.0023317	0	0	0	0	0	0	0	0	0	2.06659e-05
Viral_bacteria__Siphoviridae Kp36virus__Klebsiella virus Sushi	1.52161e-05	0.000990922	0.000445574	0.00300419	0	0	0.00216701	3.57962e-06	2.64054e-05	0	2.66099e-05	5.61141e-06	3.75573e-05	0
Viral_bacteria__Siphoviridae L5virus__Mycobacterium phage Anubis	0	0	0	5.51228e-06	0	5.01731e-05	0	0	2.64054e-05	4.50091e-05	7.09597e-05	0.000389993	0.000300458	0
Viral_bacteria__Siphoviridae L5virus__Mycobacterium phage BillKnuckles	5.24693e-07	0	0	0	0	0	0.00170265	0	9.2419e-05	0	0	0	1.25191e-05	0
Viral_bacteria__Siphoviridae L5virus__Mycobacterium phage Bxz2	0	0	0	0	0	0.000401385	7.73934e-05	3.57962e-06	0.000158433	9.00181e-05	0.000452368	8.04302e-05	0.000363054	0
Viral_bacteria__Siphoviridae L5virus__Mycobacterium phage Che12	0	0	0	0	0	0	0	0	2.64054e-05	2.25045e-05	0	0.000120645	0	0
Viral_bacteria__Siphoviridae L5virus__Mycobacterium phage LHTSCC	0	0	0	0	0	7.52596e-05	0	0	1.32027e-05	0.000225045	0.000168529	0.000255319	5.00764e-05	0
Viral_bacteria__Siphoviridae L5virus__Mycobacterium phage MarQuardt	0	0	0	0	0	5.01731e-05	0	1.78981e-06	0.000132027	0.000686388	0.000283839	6.26607e-05	3.75573e-05	0
Viral_bacteria__Siphoviridae L5virus__Mycobacterium phage Peaches	0	0	0	0	0	7.52596e-05	0.00023218	0	2.64054e-05	0.000112523	0	6.07903e-05	3.75573e-05	0
Viral_bacteria__Siphoviridae L5virus__Mycobacterium phage Pukovnik	0	0	0	5.51228e-06	0	0.000125433	0.00417924	1.43185e-05	6.60136e-05	0.000551361	0.00157885	0.000121581	0.000162748	0
Viral_bacteria__Siphoviridae L5virus__Mycobacterium phage Smeadley	5.24693e-07	0	0	0	0	5.01731e-05	7.73934e-05	0	7.92163e-05	0	8.86997e-06	0	0.000150229	0
Viral_bacteria__Siphoviridae L5virus__Mycobacterium phage Tiffany	0	0	0	0	0	0.000100346	7.73934e-05	3.57962e-06	3.96081e-05	3.37568e-05	0.000141919	0.00051625	0.000212825	0
Viral_bacteria__Siphoviridae L5virus__Mycobacterium virus Alma	0	0	0	5.51228e-06	2.5752e-05	0.0076514	0.000309574	0	0.000105622	0.00123775	0.000212879	0.000179565	0.000625955	2.06659e-05
Viral_bacteria__Siphoviridae L5virus__Mycobacterium virus Redrock	5.24693e-07	0	1.01267e-05	0	2.5752e-05	5.01731e-05	7.73934e-05	0	0.000171635	9.00181e-05	1.77399e-05	0.000760346	6.25955e-05	6.19976e-05
Viral_bacteria__Siphoviridae L5virus__Mycobacterium virus Trixie	0	0	0	0	0	0.000501731	0.00023218	0	0.000132027	0.000382577	0.000709597	5.33084e-05	0.000375573	0
Viral_bacteria__Siphoviridae L5virus__Rhodococcus phage RGL3	0	0	0	0	0	0	0	1.78981e-06	2.64054e-05	0.000112523	8.86997e-06	0	0	0
Viral_bacteria__Siphoviridae Lambdavirus__Bacillus phage phi105	6.82101e-06	6.39304e-06	1.01267e-05	1.65369e-05	0.000283272	0.000401385	0.000773934	1.25287e-05	0.000105622	0.000675136	0.000177399	9.35235e-05	0.000350535	2.06659e-05
Viral_bacteria__Siphoviridae Lambdavirus__Bacillus phage SPP1	5.24693e-07	0	5.06334e-05	9.37088e-05	5.15039e-05	0.000150519	0.000619147	1.43185e-05	0.000132027	0.00059637	0.000221749	2.8057e-05	0.000262901	0.00024799
Viral_bacteria__Siphoviridae Lambdavirus__Burkholderia phage KS9	3.14816e-06	0	9.11402e-05	0.000143319	0.000283272	0.000526818	0.000309574	1.61083e-05	0.000382879	0.000573865	0.000514458	1.21581e-05	0.000237863	0.000227324
Viral_bacteria__Siphoviridae Lambdavirus__Enterobacteria phage cdtI	0.00029855	0	0.000172154	1.10246e-05	0	0	0	0	0.000264054	7.87659e-05	7.09597e-05	9.35235e-06	5.00764e-05	4.13317e-05
Viral_bacteria__Siphoviridae Lambdavirus__Enterobacteria phage HK140	9.96917e-06	0	2.02534e-05	1.65369e-05	0	0	0	1.78981e-06	0.000132027	1.12523e-05	0	0	0	0
Viral_bacteria__Siphoviridae Lambdavirus__Enterobacteria phage HK225	3.46297e-05	0	5.06334e-05	5.51228e-06	2.5752e-05	0	0	1.78981e-06	0.000105622	2.25045e-05	0	9.35235e-07	2.50382e-05	4.13317e-05
Viral_bacteria__Siphoviridae Lambdavirus__Enterobacteria phage HK629	0.000278612	1.27861e-05	0.00012152	2.75614e-05	0	2.50865e-05	0	7.15925e-06	0.000198041	0.000112523	9.75696e-05	0	5.00764e-05	8.26634e-05
Viral_bacteria__Siphoviridae Lambdavirus__Enterobacteria phage mEp235	6.29632e-06	0	0	0	0	0	0	5.36944e-06	0.000224446	1.12523e-05	0	0	6.25955e-05	2.06659e-05
Viral_bacteria__Siphoviridae Lambdavirus__Enterobacteria phage mEp237	2.67593e-05	0	2.02534e-05	0	0	0	7.73934e-05	0	0	1.12523e-05	0.000283839	0	5.00764e-05	2.06659e-05
Viral_bacteria__Siphoviridae Lambdavirus__Enterobacteria phage mEp460	0.000137994	0	5.06334e-05	1.10246e-05	0	0	0.000541754	0	6.60136e-05	1.12523e-05	1.77399e-05	0	0	6.19976e-05
Viral_bacteria__Siphoviridae Lambdavirus__Enterobacterial phage mEp390	0.000518397	0	0	0	0	0	0	0	1.32027e-05	0	1.77399e-05	0	2.50382e-05	2.06659e-05
Viral_bacteria__Siphoviridae Lambdavirus__Mannheimia phage vB_MhS_1152AP2	4.19754e-06	0	1.01267e-05	6.06351e-05	0.000206016	0.000401385	0.0011609	4.11657e-05	0.00029046	0.000933938	0.00154337	4.95675e-05	0.000563359	2.06659e-05
Viral_bacteria__Siphoviridae Lambdavirus__Mannheimia phage vB_MhS_535AP2	5.24693e-07	0	0	1.10246e-05	7.72559e-05	0	0	1.78981e-05	0.000211243	1.12523e-05	0.0105641	3.74094e-06	1.25191e-05	0.000103329
Viral_bacteria__Siphoviridae Lambdavirus__Mannheimia phage vB_MhS_587AP2	0	0	0	5.51228e-06	0	0.00107872	7.73934e-05	1.07389e-05	0.000897785	3.37568e-05	0.000532198	1.87047e-06	0.000112672	2.06659e-05
Viral_bacteria__Siphoviridae Lambdavirus__Stx2-converting phage 1717	0.000126976	6.39304e-06	0.00021266	4.40983e-05	2.5752e-05	2.50865e-05	7.73934e-05	7.15925e-06	0.000184838	9.00181e-05	6.20898e-05	1.87047e-06	5.00764e-05	2.06659e-05
Viral_bacteria__Siphoviridae Mudcatvirus__Arthrobacter virus Mudcat	1.41667e-05	0	4.05067e-05	0.000159856	0.0105841	0.0144749	0.00309574	0.306101	0.00955877	0.00130526	0.0228136	0.000187047	0.0341145	0.000144661
Viral_bacteria__Siphoviridae Nonagvirus__Escherichia virus 9g	6.29632e-06	0	0	1.10246e-05	0.000206016	0	0.000309574	3.57962e-06	6.60136e-05	3.37568e-05	3.54799e-05	3.83446e-05	6.25955e-05	0.000123995
Viral_bacteria__Siphoviridae Nonagvirus__Escherichia virus JenP1	8.0278e-05	0.00368239	0.00116457	0.00709431	0	0	0	0	2.64054e-05	1.12523e-05	0	9.35235e-06	1.25191e-05	0
Viral_bacteria__Siphoviridae Nonagvirus__Escherichia virus JenP2	2.20371e-05	0.00115075	0.000364561	0.00250809	0	0	0	0	1.32027e-05	0	0	0	0	4.13317e-05
Viral_bacteria__Siphoviridae Np1virus__Pseudomonas virus NP1	1.57408e-06	0	0	1.10246e-05	0.000283272	0	0.000386967	0	1.32027e-05	0.000427586	4.43498e-05	0.000332944	0	2.06659e-05
Viral_bacteria__Siphoviridae Omegavirus__Mycobacterium phage Courthouse	1.78396e-05	0	0.000101267	0.000275614	0.00136485	0.00170589	0.00100611	6.08536e-05	0.000990204	0.00344319	0.000842647	0.000167407	0.00195298	0.000764637
Viral_bacteria__Siphoviridae Omegavirus__Mycobacterium phage Omega	3.67285e-06	6.39304e-06	2.02534e-05	0.000104733	0.000669551	0.000978375	0.000386967	3.40064e-05	0.000224446	0.000438838	0.000141919	5.05027e-05	0.000475725	0.000433983
Viral_bacteria__Siphoviridae Omegavirus__Mycobacterium virus Thibault	1.57408e-06	0	0	5.51228e-05	0	7.52596e-05	7.73934e-05	3.57962e-06	0.000184838	6.75136e-05	0.000620898	0	0.000187786	6.19976e-05
Viral_bacteria__Siphoviridae P12002virus__Polaribacter virus P12002L	1.04939e-06	0	0	1.65369e-05	0.000103008	0	0.000851327	2.14777e-05	0.000118824	3.37568e-05	0.000141919	0.000145897	6.25955e-05	0
Viral_bacteria__Siphoviridae P12002virus__Polaribacter virus P12002S	5.24693e-07	0	0	0	0	5.01731e-05	0.000154787	1.78981e-06	5.28109e-05	0.000112523	6.20898e-05	1.87047e-06	0.000100153	0
Viral_bacteria__Siphoviridae P23virus__Thermus phage P2345	0	0	2.02534e-05	3.30737e-05	7.72559e-05	5.01731e-05	0	7.15925e-06	0.000448892	0.000157532	7.09597e-05	9.35235e-07	8.76336e-05	2.06659e-05
Viral_bacteria__Siphoviridae P70virus__Listeria virus LP110	0	0	0	0	0.000103008	0	7.73934e-05	3.57962e-06	3.96081e-05	1.12523e-05	8.86997e-06	2.52513e-05	3.75573e-05	0
Viral_bacteria__Siphoviridae P70virus__Listeria virus P70	0	0	0	0	5.15039e-05	0	0.000154787	0	0	0	3.54799e-05	2.8057e-06	0	0
Viral_bacteria__Siphoviridae Pa6virus__Propionibacterium virus ATCC29399BC	5.24693e-06	0	4.05067e-05	0	0	2.50865e-05	0.000851327	1.78981e-06	6.60136e-05	1.12523e-05	1.77399e-05	3.83446e-05	1.25191e-05	0.00208725
Viral_bacteria__Siphoviridae Pa6virus__Propionibacterium virus ATCC29399BT	2.62347e-06	0	2.02534e-05	5.51228e-06	0	0	0.000619147	0	0	0	0	0	0	0.000227324
Viral_bacteria__Siphoviridae Pa6virus__Propionibacterium virus Attacne	3.14816e-06	0	4.05067e-05	0	0	0	0.000154787	0	3.96081e-05	0	8.86997e-06	9.35235e-07	0	0.00113662
Viral_bacteria__Siphoviridae Pa6virus__Propionibacterium virus Kubed	5.24693e-07	0	0	0	0	0	7.73934e-05	0	1.32027e-05	1.12523e-05	0	0	1.25191e-05	0.00035132
Viral_bacteria__Siphoviridae Pa6virus__Propionibacterium virus Lauchelly	2.62347e-06	0	0	0	0	0	7.73934e-05	1.78981e-06	1.32027e-05	1.12523e-05	0	3.74094e-06	0	0.00024799
Viral_bacteria__Siphoviridae Pa6virus__Propionibacterium virus MrAK	2.62347e-06	0	3.03801e-05	0	0	2.50865e-05	0.000309574	0	0	0	8.86997e-06	2.8057e-06	0	0.000785302
Viral_bacteria__Siphoviridae Pa6virus__Propionibacterium virus Ouroboros	0	0	2.02534e-05	0	0	0	0	0	1.32027e-05	0	0	1.87047e-06	0	0.000123995
Viral_bacteria__Siphoviridae Pa6virus__Propionibacterium virus P1.1	2.09877e-06	0	0	0	0	0	0.000386967	0	0	1.12523e-05	0	1.87047e-06	1.25191e-05	0.000289322
Viral_bacteria__Siphoviridae Pa6virus__Propionibacterium virus P1001	1.04939e-06	0	1.01267e-05	0	0	0	0	0	1.32027e-05	0	0	0	0	0.00049598
Viral_bacteria__Siphoviridae Pa6virus__Propionibacterium virus P100A	5.24693e-07	0	0	0	0	0	0.00023218	1.78981e-06	0	1.12523e-05	0	0	0	0.000144661
Viral_bacteria__Siphoviridae Pa6virus__Propionibacterium virus P100D	1.04939e-06	0	3.03801e-05	0	0	0	0	0	0	0	0	0	0	0.000537312
Viral_bacteria__Siphoviridae Pa6virus__Propionibacterium virus P101A	0	0	1.01267e-05	0	0	0	0	0	0	0	0	0	0	0.000392651
Viral_bacteria__Siphoviridae Pa6virus__Propionibacterium virus P104A	0	6.39304e-06	2.02534e-05	0	0	0	0.000309574	0	0	0	0	0	1.25191e-05	0.000268656
Viral_bacteria__Siphoviridae Pa6virus__Propionibacterium virus P105	1.04939e-06	0	0	0	0	0	0.00023218	0	0	0	0	0	0	0.000123995
Viral_bacteria__Siphoviridae Pa6virus__Propionibacterium virus P91	5.24693e-07	0	2.02534e-05	0	0	0	0	0	0	0	0	0	0	0.000206659
Viral_bacteria__Siphoviridae Pa6virus__Propionibacterium virus PA6	1.04939e-06	0	1.01267e-05	0	0	0	0	0	1.32027e-05	0	0	9.35235e-07	0	0.000413317
Viral_bacteria__Siphoviridae Pa6virus__Propionibacterium virus Pacnes201215	1.04939e-06	0	1.01267e-05	0	0	0	0	0	0	0	0	0	0	0.000103329
Viral_bacteria__Siphoviridae Pa6virus__Propionibacterium virus PAD20	2.09877e-06	0	2.02534e-05	0	0	0	0	0	0	0	0	0	0	0.000206659
Viral_bacteria__Siphoviridae Pa6virus__Propionibacterium virus PHL009M11	0	6.39304e-06	0	0	0	2.50865e-05	0	0	0	0	0	0	0	0.000309988
Viral_bacteria__Siphoviridae Pa6virus__Propionibacterium virus PHL041M10	0	0	0	0	0	0	0.000928721	1.78981e-05	1.32027e-05	1.12523e-05	8.86997e-06	0	1.25191e-05	8.26634e-05
Viral_bacteria__Siphoviridae Pa6virus__Propionibacterium virus PHL060L00	0	6.39304e-06	0	0	0	0	0	1.78981e-06	0	0	0	0	0	0.000227324
Viral_bacteria__Siphoviridae Pa6virus__Propionibacterium virus PHL070N00	5.24693e-07	0	0	0	0	0	0	0	0	0	0	9.35235e-07	0	0.000165327
Viral_bacteria__Siphoviridae Pa6virus__Propionibacterium virus PHL071N05	0	0	0	1.10246e-05	0	0	0	0	0	0	0	0	0	0.000144661
Viral_bacteria__Siphoviridae Pa6virus__Propionibacterium virus PHL095N00	0	0	0	0	0	0	0	0	0	0	0	0	0	0.000165327
Viral_bacteria__Siphoviridae Pa6virus__Propionibacterium virus PHL113M01	5.24693e-07	0	0	0	5.15039e-05	0	0.00046436	0	0	1.12523e-05	8.86997e-06	2.8057e-06	0	2.06659e-05
Viral_bacteria__Siphoviridae Pa6virus__Propionibacterium virus PHL114L00	0	0	0	0	0	0	0	1.07389e-05	2.64054e-05	0	8.86997e-06	3.74094e-06	0	0.000144661
Viral_bacteria__Siphoviridae Pa6virus__Propionibacterium virus PHL116M00	0	0	0	5.51228e-06	0	0	0	0	0	0	0	9.35235e-07	0	0.000103329
Viral_bacteria__Siphoviridae Pa6virus__Propionibacterium virus PHL141N00	0	0	0	0	0	0	0	0	0	0	0	0	0	0.000103329
Viral_bacteria__Siphoviridae Pa6virus__Propionibacterium virus PHL152M00	5.24693e-07	0	0	0	0	0.00461592	0	0	0	0	0	1.87047e-06	0.000863817	8.26634e-05
Viral_bacteria__Siphoviridae Pa6virus__Propionibacterium virus PHL179M00	5.24693e-07	0	1.01267e-05	0	0	0	0.00023218	1.78981e-06	0	0	0	8.41711e-06	0	0.000165327
Viral_bacteria__Siphoviridae Pa6virus__Propionibacterium virus PHL199M00	0	0	0	0	0	0	0.000541754	0	0	0	0	0	0	4.13317e-05
Viral_bacteria__Siphoviridae Pa6virus__Propionibacterium virus Procrass1	1.04939e-06	0	0	0	0	0	0.00046436	1.78981e-06	0	0	0	0	0	0.000123995
Viral_bacteria__Siphoviridae Pa6virus__Propionibacterium virus SKKY	5.24693e-07	0	0	0	2.5752e-05	0	0.00046436	0	0	0	0	0	0	0
Viral_bacteria__Siphoviridae Pa6virus__Propionibacterium virus Stormborn	1.04939e-06	0	2.02534e-05	0	2.5752e-05	0	0.000851327	3.57962e-06	0	0	2.66099e-05	9.35235e-07	0	0.000103329
Viral_bacteria__Siphoviridae Pa6virus__Propionibacterium virus Wizzo	0	0	0	0	0	0	0	0	0	0	0	0	0	0.000103329
Viral_bacteria__Siphoviridae Pepy6virus__Rhodococcus virus Pepy6	0.000270217	6.39304e-06	4.05067e-05	0.000104733	0.010172	0.0172094	0.00510796	0.443014	0.0118956	0.00189038	0.0270711	0.000172083	0.0420767	8.26634e-05
Viral_bacteria__Siphoviridae Pepy6virus__Rhodococcus virus Poco6	1.57408e-06	1.27861e-05	4.05067e-05	6.06351e-05	0.00682427	0.00993427	0.00216701	0.114861	0.00743313	0.000933938	0.0154249	7.76245e-05	0.0236611	4.13317e-05
Viral_bacteria__Siphoviridae Phic31virus__Streptomyces phage phiSASD1	0	0	0	0	2.5752e-05	0	0	0	0.000158433	7.87659e-05	0	0	0.000175267	2.06659e-05
Viral_bacteria__Siphoviridae Phicbkvirus__Caulobacter virus Karma	8.39509e-06	6.39304e-06	3.03801e-05	5.51228e-05	0	0	0.000773934	3.57962e-06	0.000118824	1.12523e-05	0	0	8.76336e-05	2.06659e-05
Viral_bacteria__Siphoviridae Phicbkvirus__Caulobacter virus Rogue	1.04939e-06	0	1.01267e-05	5.51228e-06	0	0	7.73934e-05	0	0.000184838	0	0	0	0	0
Viral_bacteria__Siphoviridae Phietavirus__Staphylococcus phage 11	0.000117531	0	0	5.51228e-06	5.15039e-05	2.50865e-05	7.73934e-05	1.78981e-06	6.60136e-05	0.000303811	0.000195139	1.12228e-05	0.000125191	0.000103329
Viral_bacteria__Siphoviridae Phietavirus__Staphylococcus phage 187	4.19754e-06	0	0	0	0.000103008	2.50865e-05	0.000309574	1.25287e-05	0.000105622	4.50091e-05	0.00011531	3.74094e-06	0.000112672	4.13317e-05
Viral_bacteria__Siphoviridae Phietavirus__Staphylococcus phage 29	0	0	0	0	0	7.52596e-05	0	1.43185e-05	0.00029046	0.000135027	1.77399e-05	3.64742e-05	0.000112672	0.000123995
Viral_bacteria__Siphoviridae Phietavirus__Staphylococcus phage 37	5.24693e-07	0	1.01267e-05	5.51228e-06	0.000103008	5.01731e-05	0.000696541	7.15925e-06	0.000620528	0.000146279	0.00143693	9.35235e-06	0.000212825	6.19976e-05
Viral_bacteria__Siphoviridae Phietavirus__Staphylococcus phage 52A	0	0	0	0	0.000283272	0.000376298	0	0	1.32027e-05	1.12523e-05	4.43498e-05	3.08628e-05	2.50382e-05	0
Viral_bacteria__Siphoviridae Phietavirus__Staphylococcus phage 53	0	0	0	5.51228e-06	0	5.01731e-05	0	7.15925e-06	0.000118824	6.75136e-05	0.000292709	6.54664e-06	7.51145e-05	0
Viral_bacteria__Siphoviridae Phietavirus__Staphylococcus phage 55	1.04939e-06	6.39304e-06	0	5.51228e-06	7.72559e-05	0	0	3.57962e-06	0	0.00010127	0	2.8057e-06	0	0.000103329
Viral_bacteria__Siphoviridae Phietavirus__Staphylococcus phage 71	1.57408e-06	0	0	0	0	2.50865e-05	0	0	3.96081e-05	0	1.77399e-05	0	0.000187786	0
Viral_bacteria__Siphoviridae Phietavirus__Staphylococcus phage 85	1.57408e-06	0	0	1.65369e-05	0	0.000100346	7.73934e-05	1.78981e-05	2.64054e-05	0.000135027	1.77399e-05	1.87047e-06	0.00185283	0
Viral_bacteria__Siphoviridae Phietavirus__Staphylococcus phage 88	0	0	0	5.51228e-06	0.000154512	0.000125433	0.000851327	3.57962e-06	0.00216525	0.000258802	0	1.49638e-05	7.51145e-05	0
Viral_bacteria__Siphoviridae Phietavirus__Staphylococcus phage 92	0	0	0	0	0	0	0.000696541	1.78981e-06	0	0.000213793	7.09597e-05	2.33809e-05	1.25191e-05	0
Viral_bacteria__Siphoviridae Phietavirus__Staphylococcus phage 96	0	0	0	1.10246e-05	0	0	0	1.07389e-05	5.28109e-05	0	0.000239489	1.87047e-06	1.25191e-05	2.06659e-05
Viral_bacteria__Siphoviridae Phietavirus__Staphylococcus phage B166	0	0	0	0	5.15039e-05	0.000100346	0.00108351	1.78981e-06	0.00014523	1.12523e-05	0.000168529	2.71218e-05	0.000175267	0
Viral_bacteria__Siphoviridae Phietavirus__Staphylococcus phage B236	0	0	0	1.10246e-05	0	0	7.73934e-05	3.57962e-06	0	0	8.86997e-06	0	0.000300458	0
Viral_bacteria__Siphoviridae Phietavirus__Staphylococcus phage CNPH82	7.3457e-06	6.39304e-06	0.00021266	0	0	5.01731e-05	0	8.94906e-06	0.000184838	2.25045e-05	8.86997e-06	0	5.00764e-05	0.000103329
Viral_bacteria__Siphoviridae Phietavirus__Staphylococcus phage EW	5.24693e-06	1.91791e-05	3.03801e-05	0.000143319	0.00149361	0.00188149	0.000309574	4.11657e-05	0.00106942	0.00180036	0.00101118	0.00033762	0.0021658	0
Viral_bacteria__Siphoviridae Phietavirus__Staphylococcus phage Ipla5	2.09877e-06	0	3.03801e-05	1.10246e-05	0	0	7.73934e-05	0	0.000343271	7.87659e-05	3.54799e-05	3.74094e-06	5.00764e-05	0.00035132
Viral_bacteria__Siphoviridae Phietavirus__Staphylococcus phage Ipla7	1.57408e-06	6.39304e-06	5.06334e-05	0	0	0	0	1.78981e-06	1.32027e-05	2.25045e-05	8.86997e-06	1.87047e-06	0.000237863	6.19976e-05
Viral_bacteria__Siphoviridae Phietavirus__Staphylococcus phage PH15	2.62347e-06	0	0	5.51228e-06	0	0	0	1.78981e-06	0.00120145	1.12523e-05	1.77399e-05	9.35235e-07	1.25191e-05	4.13317e-05
Viral_bacteria__Siphoviridae Phietavirus__Staphylococcus phage phiETA	5.24693e-07	0	0	0	0.00012876	2.50865e-05	0	1.78981e-06	1.32027e-05	2.25045e-05	0	3.74094e-06	0.000150229	0
Viral_bacteria__Siphoviridae Phietavirus__Staphylococcus phage phiETA3	0	0	0	0	0	2.50865e-05	0	0	0.000118824	1.12523e-05	8.86997e-06	9.35235e-07	3.75573e-05	2.06659e-05
Viral_bacteria__Siphoviridae Phietavirus__Staphylococcus phage X2	0	0	0	0	0	0	0	0	0.000132027	0.000157532	3.54799e-05	9.35235e-07	2.50382e-05	0
Viral_bacteria__Siphoviridae Phifelvirus__Enterococcus virus FL1	0.034008	0	0	6.61474e-05	0.000360527	5.01731e-05	0.000541754	1.78981e-05	0.000594122	2.25045e-05	0.00263438	9.5394e-05	0.00013771	0.000165327
Viral_bacteria__Siphoviridae Phifelvirus__Enterococcus virus FL2	0.00114698	0	0	2.20491e-05	2.5752e-05	2.50865e-05	0	3.57962e-06	0.000158433	0.000180036	0.0214831	1.87047e-06	0.000162748	0
Viral_bacteria__Siphoviridae Phifelvirus__Enterococcus virus FL3	0.0180122	0	2.02534e-05	3.8586e-05	0.00012876	2.50865e-05	0.00278616	2.14777e-05	0.000171635	1.12523e-05	0.000204009	1.5899e-05	5.00764e-05	0.00113662
Viral_bacteria__Siphoviridae Phijl1virus__Lactobacillus virus ATCC8014	0.000526792	0	0	5.51228e-06	0	0	0	7.15925e-06	0	2.25045e-05	1.77399e-05	0	0.000563359	0
Viral_bacteria__Siphoviridae Phijl1virus__Lactobacillus virus phiJL1	0	0	0	2.20491e-05	0.00105583	0	0	2.68472e-05	1.32027e-05	6.75136e-05	6.20898e-05	3.74094e-06	0.000438168	0.000123995
Viral_bacteria__Siphoviridae Psavirus__Listeria virus LP302	0.00646842	0	0	1.10246e-05	0	0	0.00023218	0.000103809	0.0004885	1.12523e-05	0.00011531	7.48188e-06	0.000162748	2.06659e-05
Viral_bacteria__Siphoviridae Rdjlvirus__Roseobacter virus RDJL1	2.09877e-06	0	0	5.51228e-06	0	0	0.00046436	1.78981e-06	0.000554514	0	0	0	0	2.06659e-05
Viral_bacteria__Siphoviridae Rogue1virus__Escherichia virus AHP42	1.57408e-06	0	0	1.10246e-05	0	0	0	0	1.32027e-05	0.000202541	0	7.48188e-06	0	0
Viral_bacteria__Siphoviridae Rogue1virus__Escherichia virus E41c	0	0	0	1.65369e-05	0	7.52596e-05	7.73934e-05	0	1.32027e-05	0.000135027	9.75696e-05	0.000315174	0.000600916	4.13317e-05
Viral_bacteria__Siphoviridae Rogue1virus__Escherichia virus Rogue1	2.62347e-06	0.00029408	0.000111394	0.000898502	0	2.50865e-05	0	0	2.64054e-05	6.75136e-05	5.32198e-05	7.76245e-05	0.000100153	4.13317e-05
Viral_bacteria__Siphoviridae Rtpvirus__Escherichia virus Rtp	4.72224e-06	0.000204577	5.06334e-05	0.000336249	0	0	0	0	0.000158433	0	0	3.74094e-06	0	0
Viral_bacteria__Siphoviridae Sap6virus__Enterococcus virus VD13	0	0	0	0	0	0	0	0	5.28109e-05	0.000236298	0	1.87047e-05	5.00764e-05	0
Viral_bacteria__Siphoviridae Send513virus__Mycobacterium virus Papyrus	2.62347e-06	0	1.01267e-05	5.51228e-06	0	2.50865e-05	0	3.57962e-06	0	0.000123775	0	0	2.50382e-05	4.13317e-05
Viral_bacteria__Siphoviridae Septima3virus__Pseudomonas virus Ab26	0	0	0	0	0	0.00692389	7.73934e-05	0	0	0	3.54799e-05	0	0.000200305	2.06659e-05
Viral_bacteria__Siphoviridae Seuratvirus__Escherichia virus Cajan	0	0	3.03801e-05	0	0.000103008	7.52596e-05	7.73934e-05	2.8637e-05	0.000607325	0	0	0.000118775	0.0158116	4.13317e-05
Viral_bacteria__Siphoviridae Seuratvirus__Escherichia virus Seurat	5.24693e-07	0	0	0	0	0	7.73934e-05	1.78981e-06	0.000158433	3.37568e-05	8.86997e-06	0	0	0
Viral_bacteria__Siphoviridae Sextaecvirus__Staphylococcus virus SEP9	3.67285e-06	0	0	0	7.72559e-05	0	0.000309574	3.22166e-05	0.000330068	0.00118149	0.000230619	3.74094e-06	0.000250382	4.13317e-05
Viral_bacteria__Siphoviridae Sextaecvirus__Staphylococcus virus Sextaec	1.04939e-06	0	0	0	5.15039e-05	0.000200692	0.000309574	3.57962e-06	0.00229727	2.25045e-05	3.54799e-05	1.02876e-05	0.00921405	0
Viral_bacteria__Siphoviridae Sfi11virus__Streptococcus phage 2972	0	0	0.000749375	0.000126783	0	7.52596e-05	7.73934e-05	8.94906e-06	0.000171635	1.12523e-05	0.00337946	5.61141e-06	0.00276672	0.00512513
Viral_bacteria__Siphoviridae Sfi11virus__Streptococcus phage 858	0	0	3.03801e-05	2.20491e-05	0	0	7.73934e-05	3.57962e-06	1.32027e-05	1.12523e-05	0.000310449	9.35235e-07	2.50382e-05	0.00049598
Viral_bacteria__Siphoviridae Sfi11virus__Streptococcus phage Alq132	3.67285e-06	0	0.00142786	0.000286639	2.5752e-05	0	0.00023218	8.94906e-06	0.000369676	1.12523e-05	0.00302466	1.49638e-05	6.25955e-05	0.00516646
Viral_bacteria__Siphoviridae Sfi11virus__Streptococcus phage O1205	2.62347e-06	1.27861e-05	0.000172154	1.65369e-05	0.000103008	2.50865e-05	0	5.36944e-06	7.92163e-05	0	0.000957956	7.48188e-06	0.000650993	0.00159127
Viral_bacteria__Siphoviridae Sfi11virus__Streptococcus phage Sfi11	0	0	0.000172154	2.75614e-05	0	2.50865e-05	0	0	3.96081e-05	0	8.86997e-05	9.35235e-07	0.00146473	0.00113662
Viral_bacteria__Siphoviridae Sfi21dt1virus__Streptococcus phage 7201	3.67285e-06	1.91791e-05	0.00111394	0.000611864	0	2.50865e-05	0	1.43185e-05	1.32027e-05	0.000337568	0.00636864	2.33809e-05	0.0019655	0.0024799
Viral_bacteria__Siphoviridae Sfi21dt1virus__Streptococcus phage Abc2	1.04939e-05	0.000108682	0.00455701	0.00189071	0	7.52596e-05	0.000773934	7.15925e-05	0.00139949	0.000112523	0.0145556	5.14379e-05	0.000125191	0.0052078
Viral_bacteria__Siphoviridae Sfi21dt1virus__Streptococcus phage DT1	6.29632e-06	1.91791e-05	0.0020861	0.000727622	0	0	0	5.36944e-06	1.32027e-05	0	0.00678552	1.40285e-05	1.25191e-05	0.00272789
Viral_bacteria__Siphoviridae Sfi21dt1virus__Streptococcus phage Sfi19	5.24693e-07	1.27861e-05	0.000405067	9.37088e-05	0	0	0.00139308	2.32676e-05	0.000132027	1.12523e-05	0.0016232	6.73369e-05	0.000287939	0.000888632
Viral_bacteria__Siphoviridae Sfi21dt1virus__Streptococcus phage Sfi21	8.91978e-06	6.39304e-06	0.000202534	9.92211e-05	0	0	0	0	1.32027e-05	0.000292559	0.000665247	4.67617e-06	1.25191e-05	0.000433983
Viral_bacteria__Siphoviridae Siphoviridae_Unclassified__Achromobacter phage phiAxp-1	0	0	0	0	0	2.50865e-05	7.73934e-05	1.78981e-06	1.32027e-05	2.25045e-05	0.00011531	0	1.25191e-05	0
Viral_bacteria__Siphoviridae Siphoviridae_Unclassified__Achromobacter phage phiAxp-2	0	0	0	0	0	0	0.000154787	0	0	2.25045e-05	2.66099e-05	0	0	0
Viral_bacteria__Siphoviridae Siphoviridae_Unclassified__Acinetobacter phage IME_AB3	5.24693e-07	0	0	0	0	7.52596e-05	0	0.00187572	1.32027e-05	4.50091e-05	0	2.05752e-05	0.0010516	0
Viral_bacteria__Siphoviridae Siphoviridae_Unclassified__Acinetobacter phage vB_AbaS_TRS1	6.29632e-06	0	5.06334e-05	0	0	0	0	0	3.96081e-05	0	0.000443498	0	0.00966474	4.13317e-05
Viral_bacteria__Siphoviridae Siphoviridae_Unclassified__Actinoplanes phage phiAsp2	0	0	0	0	0	0	0.00046436	3.57962e-06	0.000303662	0	0	0	1.25191e-05	0
Viral_bacteria__Siphoviridae Siphoviridae_Unclassified__Arthrobacter phage vB_ArS-ArV2	5.24693e-07	0	1.01267e-05	3.8586e-05	7.72559e-05	0.000125433	0.000309574	1.43185e-05	0.00129387	0.000157532	0.00103779	6.3596e-05	0.000200305	2.06659e-05
Viral_bacteria__Siphoviridae Siphoviridae_Unclassified__Bacillus phage BCJA1c	0.101062	2.55722e-05	0	4.40983e-05	2.5752e-05	0	0.0117638	0.000628224	0.0160809	0.000236298	0.000612028	2.43161e-05	0.000926413	0
Viral_bacteria__Siphoviridae Siphoviridae_Unclassified__Bacillus phage BMBtpLA	0.00184954	0	2.02534e-05	3.8586e-05	7.72559e-05	0.000200692	0	1.61083e-05	0.00184838	0.000157532	7.09597e-05	7.48188e-06	0.000312977	2.06659e-05
Viral_bacteria__Siphoviridae Siphoviridae_Unclassified__Bacillus phage BtCS33	0	0	1.01267e-05	2.20491e-05	2.5752e-05	0.0195424	0.000154787	7.15925e-06	0.00014523	4.50091e-05	0.000239489	4.67617e-06	0.00250382	0
Viral_bacteria__Siphoviridae Siphoviridae_Unclassified__Bacillus phage Fah	1.04939e-06	0	0	1.10246e-05	0.000309023	0.000852943	0.000154787	3.22166e-05	0.000369676	0.000123775	5.32198e-05	4.58265e-05	0.000438168	0
Viral_bacteria__Siphoviridae Siphoviridae_Unclassified__Bacillus phage PBC1	1.20679e-05	0	4.05067e-05	7.16597e-05	5.15039e-05	5.01731e-05	0.0011609	2.32676e-05	0.00215204	0.000225045	0.000478978	2.05752e-05	0.000863817	8.26634e-05
Viral_bacteria__Siphoviridae Siphoviridae_Unclassified__Bacillus phage PfEFR-5	0.000439693	0	4.05067e-05	7.7172e-05	0	7.52596e-05	0.000851327	3.22166e-05	0.000184838	0.000123775	0.000310449	2.8057e-05	0.000350535	0
Viral_bacteria__Siphoviridae Siphoviridae_Unclassified__Bacillus phage phi4B1	5.24693e-07	0	0	2.20491e-05	2.5752e-05	5.01731e-05	0.000541754	3.22166e-05	0.000343271	0.000112523	0.000381409	6.54664e-06	0.00184031	0
Viral_bacteria__Siphoviridae Siphoviridae_Unclassified__Bacillus phage phi4J1	2.62347e-05	3.19652e-05	0.00024304	0.000562253	0.0019314	0.00423963	0.0058045	0.000170032	0.00345911	0.0116573	0.00292709	0.00047697	0.00712336	0.00148794
Viral_bacteria__Siphoviridae Siphoviridae_Unclassified__Bacillus phage phIS3501	0	0	1.01267e-05	0	0	2.50865e-05	0	5.36944e-06	0.000158433	0	1.77399e-05	0	0	0
Viral_bacteria__Siphoviridae Siphoviridae_Unclassified__Bacillus phage PM1	4.19754e-06	0	0	0	7.72559e-05	0.000225779	0.00170265	1.25287e-05	0.000171635	0.00034882	0.000860387	1.77695e-05	0.000312977	0
Viral_bacteria__Siphoviridae Siphoviridae_Unclassified__Bacillus phage TP21-L	5.24693e-07	0	0	2.75614e-05	0	0.000100346	0.000541754	3.57962e-05	0.0004885	0.000303811	3.54799e-05	6.54664e-06	0.00210321	0
Viral_bacteria__Siphoviridae Siphoviridae_Unclassified__Bacillus phage vB_BanS-Tsamsa	4.19754e-06	0	2.02534e-05	0.00019293	0.00103008	0.00102855	0.00255398	7.87517e-05	0.00373637	0.00153031	0.000913607	9.07178e-05	0.00127695	0.000330654
Viral_bacteria__Siphoviridae Siphoviridae_Unclassified__Bacillus phage vB_BhaS-171	0.000145865	1.27861e-05	2.02534e-05	4.96106e-05	0.00012876	0.000100346	0.000541754	3.93759e-05	0.000250852	0.00112523	0.000310449	1.5899e-05	0.000363054	4.13317e-05
Viral_bacteria__Siphoviridae Siphoviridae_Unclassified__Bacillus phage Waukesha92	0	0	0	5.51228e-06	0	0.000125433	7.73934e-05	1.25287e-05	0.000224446	1.12523e-05	0	3.74094e-06	8.76336e-05	0
Viral_bacteria__Siphoviridae Siphoviridae_Unclassified__Bacteriophage Lily	0.000340526	0	1.01267e-05	9.37088e-05	0.000206016	0.000401385	0.00495318	0.000315007	0.00410604	0.000540109	0.00218201	4.58265e-05	0.00151481	4.13317e-05
Viral_bacteria__Siphoviridae Siphoviridae_Unclassified__Bacteroides phage B124-14	1.57408e-06	0	1.01267e-05	0.000154344	0.000540791	0.000426471	0.0922529	0.00047072	0.00282538	0.000528856	0.044137	0.000187982	0.000425649	0
Viral_bacteria__Siphoviridae Siphoviridae_Unclassified__Bacteroides phage B40-8	1.57408e-06	0	4.05067e-05	7.16597e-05	0.00012876	0.000100346	0.0183422	7.69619e-05	0.00043569	0.00525481	0.00587192	4.58265e-05	0.000513283	2.06659e-05
Viral_bacteria__Siphoviridae Siphoviridae_Unclassified__Brevibacillus phage Sundance	5.24693e-07	0	2.02534e-05	9.92211e-05	0.00409456	0.000752596	0.00162526	3.57962e-05	0.00458134	0.00115898	0.000567678	0.000422726	0.00212825	8.26634e-05
Viral_bacteria__Siphoviridae Siphoviridae_Unclassified__Brochothrix phage BL3	0.00676749	0	2.02534e-05	1.10246e-05	2.5752e-05	0.000125433	7.73934e-05	3.7586e-05	0.000264054	0.000191288	0.000204009	4.67617e-06	0.00013771	6.19976e-05
Viral_bacteria__Siphoviridae Siphoviridae_Unclassified__Brochothrix phage NF5	0.002858	0	2.02534e-05	4.96106e-05	0.000309023	0	7.73934e-05	3.57962e-06	0.000118824	7.87659e-05	0.000363669	4.11503e-05	0.00113924	2.06659e-05
Viral_bacteria__Siphoviridae Siphoviridae_Unclassified__Burkholderia phage AH2	1.04939e-06	0	1.01267e-05	1.65369e-05	0	0.000100346	7.73934e-05	0.000164663	1.32027e-05	0	0	0	0.000175267	2.06659e-05
Viral_bacteria__Siphoviridae Siphoviridae_Unclassified__Burkholderia phage BcepGomr	3.67285e-06	1.91791e-05	1.01267e-05	2.75614e-05	2.5752e-05	5.01731e-05	0	1.78981e-06	0.000211243	1.12523e-05	5.32198e-05	9.35235e-07	0.000112672	2.06659e-05
Viral_bacteria__Siphoviridae Siphoviridae_Unclassified__Caulobacter phage CcrColossus	7.3457e-06	0	5.06334e-05	9.37088e-05	2.5752e-05	0	0.000386967	1.43185e-05	0.000382879	9.00181e-05	9.75696e-05	3.74094e-06	5.00764e-05	0.000268656
Viral_bacteria__Siphoviridae Siphoviridae_Unclassified__Cellulophaga phage phi19:1	5.24693e-07	0	0	1.10246e-05	0.000103008	0	0.0109125	3.93759e-05	0.000686541	0	0.000762817	3.74094e-06	0	0
Viral_bacteria__Siphoviridae Siphoviridae_Unclassified__Cellulophaga phage phi39:1	5.24693e-07	0	0	3.8586e-05	5.15039e-05	7.52596e-05	0	1.61083e-05	0.000501703	0.000157532	0.000594288	0	0.000175267	0
Viral_bacteria__Siphoviridae Siphoviridae_Unclassified__Cellulophaga phage phi46:1	0	0	0	0	0.00401731	0	0	0	0	0	0	0.000347907	0	0
Viral_bacteria__Siphoviridae Siphoviridae_Unclassified__Citrobacter phage Stevie	0.000120679	0.00337553	0.00164052	0.00883068	0	0	0	0	1.32027e-05	0	8.86997e-06	9.35235e-07	0	0.000227324
Viral_bacteria__Siphoviridae Siphoviridae_Unclassified__Clostridium phage 39-O	4.72224e-06	0	0	3.8586e-05	5.15039e-05	0.00110381	0.00193483	8.41211e-05	0.000977001	0.000753902	0.00938442	1.87047e-05	0.00880092	0
Viral_bacteria__Siphoviridae Siphoviridae_Unclassified__Clostridium phage phi3626	2.09877e-06	1.91791e-05	4.05067e-05	0.000104733	5.15039e-05	0.000125433	0.000386967	4.29555e-05	0.000620528	0.000708893	0.00117084	8.41711e-06	0.000100153	2.06659e-05
Viral_bacteria__Siphoviridae Siphoviridae_Unclassified__Clostridium phage phi8074-B1	1.04939e-06	6.39304e-06	2.02534e-05	5.51228e-06	0.00975999	5.01731e-05	0.00131569	8.94906e-06	0.00301022	0.000461343	2.66099e-05	0.000447978	0.000350535	2.06659e-05
Viral_bacteria__Siphoviridae Siphoviridae_Unclassified__Clostridium phage phiCD111	0	0	0	1.10246e-05	0.000103008	0.000175606	0.00123829	0.000128866	0.00228407	0.000191288	0.00400922	3.64742e-05	0.000638474	0
Viral_bacteria__Siphoviridae Siphoviridae_Unclassified__Clostridium phage phiCD146	5.24693e-07	0	0	0	0.00012876	5.01731e-05	0.000309574	0.000118128	0.000369676	3.37568e-05	0.000842647	4.67617e-06	7.51145e-05	0
Viral_bacteria__Siphoviridae Siphoviridae_Unclassified__Clostridium phage phiCD38-2	0.000390372	0	0	1.65369e-05	2.5752e-05	2.50865e-05	0.00108351	8.94906e-05	0.000343271	1.12523e-05	6.20898e-05	1.30933e-05	5.00764e-05	0
Viral_bacteria__Siphoviridae Siphoviridae_Unclassified__Clostridium phage phiCD6356	0.00254791	0	1.01267e-05	1.10246e-05	5.15039e-05	0.000451558	0.00139308	5.7274e-05	0.000343271	0.000798911	0.000390279	8.41711e-06	0.00136458	0
Viral_bacteria__Siphoviridae Siphoviridae_Unclassified__Clostridium phage phiCP13O	1.57408e-06	0	0	1.65369e-05	7.72559e-05	0.000150519	0.000696541	2.32676e-05	0.000765757	0.000191288	0.000904737	9.35235e-06	0.00564611	0
Viral_bacteria__Siphoviridae Siphoviridae_Unclassified__Clostridium phage phiCP26F	0	0	0	0	0	0	7.73934e-05	8.94906e-06	2.64054e-05	0	0.000159659	9.35235e-07	0	0
Viral_bacteria__Siphoviridae Siphoviridae_Unclassified__Clostridium phage phiCP34O	0	0	0	0	2.5752e-05	0	0	1.78981e-06	9.2419e-05	0.000146279	0.0018006	9.35235e-07	0	0
Viral_bacteria__Siphoviridae Siphoviridae_Unclassified__Clostridium phage phiCT453B	5.40434e-05	0	5.06334e-05	2.20491e-05	7.72559e-05	0.000526818	0.00735237	1.78981e-05	0.000660136	0.0004951	0.000957956	4.67617e-05	0.00166504	0
Viral_bacteria__Siphoviridae Siphoviridae_Unclassified__Clostridium phage phiCTP1	2.09877e-06	6.39304e-06	3.03801e-05	8.81965e-05	0.00092707	0.000878029	0.0023218	6.26434e-05	0.00141269	0.00229546	0.00145467	9.63292e-05	0.00108916	0.000206659
Viral_bacteria__Siphoviridae Siphoviridae_Unclassified__Clostridium phage PhiS63	5.24693e-07	0	0	1.10246e-05	5.15039e-05	2.50865e-05	7.73934e-05	3.57962e-06	0.000316865	5.62613e-05	0.000159659	0	0.000150229	0
Viral_bacteria__Siphoviridae Siphoviridae_Unclassified__Clostridium phage phiSM101	1.04939e-06	0	2.02534e-05	6.06351e-05	0	0	0.000619147	1.25287e-05	0.000607325	6.75136e-05	4.43498e-05	1.30933e-05	0.000150229	0
Viral_bacteria__Siphoviridae Siphoviridae_Unclassified__Clostridium phage vB_CpeS-CP51	1.04939e-05	6.39304e-06	9.11402e-05	0.000148832	0.000283272	0.000401385	0.00131569	0.000447453	0.0014655	0.000911433	0.000691857	2.99275e-05	0.000851298	2.06659e-05
Viral_bacteria__Siphoviridae Siphoviridae_Unclassified__Corynebacterium phage BFK20	0	0	0	5.51228e-06	0.000309023	0	0.00185744	0	0.000171635	0	1.77399e-05	1.68342e-05	1.25191e-05	0
Viral_bacteria__Siphoviridae Siphoviridae_Unclassified__Corynebacterium phage P1201	1.78396e-05	0	3.03801e-05	1.65369e-05	2.5752e-05	0	0.000541754	3.57962e-06	0.000118824	0	0.000266099	9.35235e-07	8.76336e-05	0.00059931
Viral_bacteria__Siphoviridae Siphoviridae_Unclassified__Croceibacter phage P2559S	5.24693e-07	6.39304e-06	1.01267e-05	3.30737e-05	0.000618047	7.52596e-05	0.0413281	1.07389e-05	0.00063373	0.000123775	0.00646621	7.10779e-05	0.000500764	0
Viral_bacteria__Siphoviridae Siphoviridae_Unclassified__Croceibacter phage P2559Y	2.36112e-05	1.91791e-05	3.03801e-05	4.96106e-05	0.00275546	0.000100346	0.0226763	0.000134236	0.00946635	0.000540109	0.00371652	0.000556465	0.000225344	0.000123995
Viral_bacteria__Siphoviridae Siphoviridae_Unclassified__Cronobacter phage ENT39118	3.30557e-05	6.39304e-06	0	2.75614e-05	0	0	7.73934e-05	3.57962e-06	0.000105622	3.37568e-05	1.77399e-05	0	0.000100153	4.13317e-05
Viral_bacteria__Siphoviridae Siphoviridae_Unclassified__Cyanophage PSS2	5.24693e-07	0	1.01267e-05	0	2.5752e-05	2.50865e-05	0	1.78981e-06	0.000198041	0.00010127	1.77399e-05	0	6.25955e-05	0
Viral_bacteria__Siphoviridae Siphoviridae_Unclassified__Enterobacter phage phiEap-2	0	6.39304e-06	2.02534e-05	0.000727622	0	2.50865e-05	0	1.78981e-06	2.64054e-05	1.12523e-05	0	0	5.00764e-05	0
Viral_bacteria__Siphoviridae Siphoviridae_Unclassified__Enterobacteria phage ES18	2.09877e-06	0	0	0	0	0	0.000154787	3.57962e-06	0.00063373	7.87659e-05	0.000159659	2.8057e-06	0	0
Viral_bacteria__Siphoviridae Siphoviridae_Unclassified__Enterobacteria phage vB_EcoS_NBD2	4.04014e-05	0.000863061	0.000445574	0.00186315	0	0	0.000696541	0	2.64054e-05	0	1.77399e-05	0	0	4.13317e-05
Viral_bacteria__Siphoviridae Siphoviridae_Unclassified__Enterococcus phage Ec-ZZ2	5.24693e-07	0	0	1.65369e-05	0	0	0	0	0.000237649	1.12523e-05	1.77399e-05	0	1.25191e-05	0
Viral_bacteria__Siphoviridae Siphoviridae_Unclassified__Enterococcus phage EfaCPT1	5.24693e-07	0	0	0	0	0	0	0	0	0	1.77399e-05	0.000248773	0	0
Viral_bacteria__Siphoviridae Siphoviridae_Unclassified__Enterococcus phage EFC-1	0.0368256	0	0	6.61474e-05	7.72559e-05	7.52596e-05	0.0103707	0.000585268	0.0103113	0.000123775	0.000966826	1.40285e-05	0.000738626	4.13317e-05
Viral_bacteria__Siphoviridae Siphoviridae_Unclassified__Enterococcus phage IME_EF3	0	0	0	0	0	0	0	5.36944e-06	0.000739352	7.87659e-05	0.000133049	4.67617e-06	0.000112672	2.06659e-05
Viral_bacteria__Siphoviridae Siphoviridae_Unclassified__Enterococcus phage IME-EFm1	2.09877e-06	0	0	1.65369e-05	0	0	0	1.78981e-06	0.000105622	1.12523e-05	0	3.74094e-06	1.25191e-05	2.06659e-05
Viral_bacteria__Siphoviridae Siphoviridae_Unclassified__Enterococcus phage phiEf11	0.000693644	0	0	5.51228e-05	2.5752e-05	0	0.000773934	5.01147e-05	0.00150511	0.000315063	0.000638638	2.33809e-05	0.000575878	0.000206659
Viral_bacteria__Siphoviridae Siphoviridae_Unclassified__Enterococcus phage phiFL4A	0.161162	0	1.01267e-05	0.000148832	0	0.000150519	0.00270877	4.65351e-05	0.00402683	0.000517604	0.00780557	1.87047e-05	0.000738626	4.13317e-05
Viral_bacteria__Siphoviridae Siphoviridae_Unclassified__Enterococcus phage SANTOR1	0	0	0	0	0	0	7.73934e-05	0	0	0.000123775	2.66099e-05	0	6.25955e-05	0
Viral_bacteria__Siphoviridae Siphoviridae_Unclassified__Enterococcus phage vB_IME196	0	0	0	0	2.5752e-05	0	0.00023218	0	2.64054e-05	3.37568e-05	3.54799e-05	0	0.000212825	0
Viral_bacteria__Siphoviridae Siphoviridae_Unclassified__Enterococcus phage vB_IME197	0.00374946	0	0	3.30737e-05	0.000103008	0	0.00216701	1.07389e-05	3.96081e-05	0.000337568	0.000159659	1.87047e-05	0.000863817	6.19976e-05
Viral_bacteria__Siphoviridae Siphoviridae_Unclassified__Enterococcus phage vB_IME198	0	0	0	0	0.00149361	0	0.00046436	0	0.000303662	1.12523e-05	0	5.42436e-05	0	0
Viral_bacteria__Siphoviridae Siphoviridae_Unclassified__Erwinia phage PhiEaH1	4.72224e-06	6.39304e-06	5.06334e-05	4.96106e-05	7.72559e-05	5.01731e-05	0.0151691	1.43185e-05	0.000514906	0.000517604	0.000150789	7.20131e-05	0.000400611	0.000206659
Viral_bacteria__Siphoviridae Siphoviridae_Unclassified__Erysipelothrix phage SE-1	0.00163967	0	1.01267e-05	1.10246e-05	5.15039e-05	2.50865e-05	0.00023218	8.05415e-05	0.000303662	0.000753902	0.00011531	5.61141e-06	0.000112672	0
Viral_bacteria__Siphoviridae Siphoviridae_Unclassified__Flavobacterium phage 11b	1.04939e-06	6.39304e-06	0	1.10246e-05	0	2.50865e-05	0.000619147	1.96879e-05	0.000264054	0.000720145	0.00131276	1.87047e-06	0.000237863	0
Viral_bacteria__Siphoviridae Siphoviridae_Unclassified__Geobacillus phage GBK2	4.72224e-06	0	5.06334e-05	4.96106e-05	0.000901319	0.00127941	0.00673322	7.69619e-05	0.0034063	0.000742649	0.00158772	0.00013748	0.00123939	8.26634e-05
Viral_bacteria__Siphoviridae Siphoviridae_Unclassified__Geobacillus virus E3	7.08336e-05	6.39304e-06	0.000172154	0.000567765	0.00236918	0.002609	0.00386967	0.000173612	0.00661456	0.0100033	0.00309562	0.000558335	0.00366809	0.00113662
Viral_bacteria__Siphoviridae Siphoviridae_Unclassified__Gordonia phage Bantam	5.24693e-06	0	3.03801e-05	1.65369e-05	0	2.50865e-05	0	0	5.28109e-05	0.000146279	1.77399e-05	2.8057e-06	1.25191e-05	0.000475315
Viral_bacteria__Siphoviridae Siphoviridae_Unclassified__Gordonia phage Bowser	1.04939e-06	0	5.06334e-05	4.96106e-05	0	2.50865e-05	7.73934e-05	3.57962e-06	0.000118824	0.000225045	5.32198e-05	0	6.25955e-05	0.000185993
Viral_bacteria__Siphoviridae Siphoviridae_Unclassified__Gordonia phage BritBrat	5.24693e-07	0	1.01267e-05	1.10246e-05	0	0	0	1.78981e-06	9.2419e-05	0	0	0	0.000100153	6.19976e-05
Viral_bacteria__Siphoviridae Siphoviridae_Unclassified__Gordonia phage Cozz	1.04939e-06	0	2.02534e-05	5.51228e-06	0.000206016	0	0	1.78981e-06	1.32027e-05	3.37568e-05	8.86997e-06	0	5.00764e-05	2.06659e-05
Viral_bacteria__Siphoviridae Siphoviridae_Unclassified__Gordonia phage Cucurbita	1.04939e-06	6.39304e-06	1.01267e-05	2.20491e-05	0	0	0.000154787	1.78981e-06	1.32027e-05	0.000135027	3.54799e-05	5.61141e-06	0	0.000309988
Viral_bacteria__Siphoviridae Siphoviridae_Unclassified__Gordonia phage GMA1	0	0	0	0	0.00012876	2.50865e-05	0.000154787	0	3.96081e-05	0	3.54799e-05	1.02876e-05	0	0
Viral_bacteria__Siphoviridae Siphoviridae_Unclassified__Gordonia phage GMA4	0	0	0	0	7.72559e-05	0	0.000154787	7.15925e-06	0.000198041	1.12523e-05	0.0020667	1.87047e-06	0.000150229	2.06659e-05
Viral_bacteria__Siphoviridae Siphoviridae_Unclassified__Gordonia phage GMA6	1.04939e-06	0	0	0	0.00025752	0.000576991	7.73934e-05	7.15925e-06	6.60136e-05	0.000393829	1.77399e-05	3.36685e-05	0.00041313	2.06659e-05
Viral_bacteria__Siphoviridae Siphoviridae_Unclassified__Gordonia phage GordDuk1	0	0	0	0	0	0	0	0	5.28109e-05	0	0.00010644	0	0	0
Viral_bacteria__Siphoviridae Siphoviridae_Unclassified__Gordonia phage Gsput1	2.09877e-06	0	3.03801e-05	1.65369e-05	2.5752e-05	0	0.000928721	0	2.64054e-05	0	0	9.35235e-07	2.50382e-05	4.13317e-05
Viral_bacteria__Siphoviridae Siphoviridae_Unclassified__Gordonia phage GTE2	0	0	0	1.10246e-05	5.15039e-05	0	0	1.78981e-06	6.60136e-05	7.87659e-05	0.000638638	0	0	0
Viral_bacteria__Siphoviridae Siphoviridae_Unclassified__Gordonia phage Jumbo	5.24693e-07	0	4.05067e-05	0	0	0	0	0	0.000105622	0	0	0	0	0
Viral_bacteria__Siphoviridae Siphoviridae_Unclassified__Gordonia phage Kita	5.24693e-07	0	0	5.51228e-06	2.5752e-05	0.000100346	0.000154787	0	6.60136e-05	0.000292559	3.54799e-05	2.8057e-06	0.00013771	2.06659e-05
Viral_bacteria__Siphoviridae Siphoviridae_Unclassified__Gordonia phage Lucky10	5.24693e-07	0	0	0	0	0	0.000309574	1.78981e-06	0	0	0	2.8057e-06	0	0
Viral_bacteria__Siphoviridae Siphoviridae_Unclassified__Gordonia phage McGonagall	5.24693e-07	0	0	5.51228e-06	0.000154512	2.50865e-05	0	1.78981e-06	1.32027e-05	7.87659e-05	0	0	6.25955e-05	0
Viral_bacteria__Siphoviridae Siphoviridae_Unclassified__Gordonia phage Nymphadora	0	0	0	2.20491e-05	0	0	0	7.15925e-06	0.000118824	1.12523e-05	0.000629768	1.87047e-06	3.75573e-05	2.06659e-05
Viral_bacteria__Siphoviridae Siphoviridae_Unclassified__Gordonia phage Orchid	0	0	0	0	0	0	7.73934e-05	0	0	2.25045e-05	0.000186269	0	1.25191e-05	0
Viral_bacteria__Siphoviridae Siphoviridae_Unclassified__Gordonia phage Splinter	1.57408e-06	0	1.01267e-05	5.51228e-06	7.72559e-05	0	0.000386967	1.78981e-06	2.64054e-05	0	5.32198e-05	1.87047e-06	0	0.000144661
Viral_bacteria__Siphoviridae Siphoviridae_Unclassified__Gordonia phage Terrapin	0	0	0	0	0	0.000526818	0.00154787	0	1.32027e-05	1.12523e-05	3.54799e-05	2.24456e-05	0.000225344	2.06659e-05
Viral_bacteria__Siphoviridae Siphoviridae_Unclassified__Gordonia phage Twister6	5.24693e-07	0	1.01267e-05	1.65369e-05	7.72559e-05	0	0.00557232	8.94906e-06	2.64054e-05	1.12523e-05	3.54799e-05	2.8057e-06	2.50382e-05	0
Viral_bacteria__Siphoviridae Siphoviridae_Unclassified__Gordonia phage Utz	5.24693e-07	0	1.01267e-05	5.51228e-06	0	0	0	0	0	0	0.000620898	0	0	0
Viral_bacteria__Siphoviridae Siphoviridae_Unclassified__Gordonia phage Yvonnetastic	5.24693e-07	0	1.01267e-05	2.75614e-05	0	0	0.000386967	0	0	7.87659e-05	2.66099e-05	2.8057e-06	3.75573e-05	0.000165327
Viral_bacteria__Siphoviridae Siphoviridae_Unclassified__Helicobacter phage phiHP33	2.62347e-06	0	0	4.40983e-05	0.00182839	0	0	1.25287e-05	0.0043833	0.000225045	0.00158772	0.0001805	5.00764e-05	2.06659e-05
Viral_bacteria__Siphoviridae Siphoviridae_Unclassified__Idiomarinaceae phage Phi1M2-2	0	0	0	0	0	7.52596e-05	0	0	6.60136e-05	2.25045e-05	0.000195139	0	0.000112672	0
Viral_bacteria__Siphoviridae Siphoviridae_Unclassified__Lactobacillus phage A2	2.62347e-06	0	0	2.75614e-05	2.5752e-05	0	7.73934e-05	6.6223e-05	0.00043569	0.000168784	0.000133049	1.96399e-05	1.25191e-05	0
Viral_bacteria__Siphoviridae Siphoviridae_Unclassified__Lactobacillus phage CL1	1.57408e-06	6.39304e-06	7.08868e-05	0.000176393	0	0	0.000386967	1.43185e-05	0.000184838	0.0004951	0.000345929	1.21581e-05	0.000500764	0
Viral_bacteria__Siphoviridae Siphoviridae_Unclassified__Lactobacillus phage iA2	4.30248e-05	0	2.02534e-05	1.65369e-05	0.00012876	0.000301039	0.00046436	3.93759e-05	0.00149191	0.0184875	0.000612028	2.24456e-05	0.000838779	2.06659e-05
Viral_bacteria__Siphoviridae Siphoviridae_Unclassified__Lactobacillus phage iLp84	5.77162e-06	0	4.05067e-05	0.000159856	0.000103008	0.000100346	0.000309574	1.78981e-05	0.00114864	5.62613e-05	5.32198e-05	2.8057e-05	0.000287939	0
Viral_bacteria__Siphoviridae Siphoviridae_Unclassified__Lactobacillus phage J-1	5.24693e-07	0	1.01267e-05	3.30737e-05	0	0	0.00046436	1.25287e-05	5.28109e-05	0.00010127	8.86997e-06	0	0.000212825	4.13317e-05
Viral_bacteria__Siphoviridae Siphoviridae_Unclassified__Lactobacillus phage JCL1032	4.04014e-05	0	1.01267e-05	2.75614e-05	2.5752e-05	5.01731e-05	0.000386967	1.43185e-05	0.000646933	7.87659e-05	9.75696e-05	5.61141e-06	0.00128947	0
Viral_bacteria__Siphoviridae Siphoviridae_Unclassified__Lactobacillus phage Lc-Nu	3.62038e-05	0	8.10135e-05	3.8586e-05	0.000103008	0	0	5.36944e-05	0.00262734	9.00181e-05	0.0125244	1.21581e-05	0.000325496	6.19976e-05
Viral_bacteria__Siphoviridae Siphoviridae_Unclassified__Lactobacillus phage Ldl1	0	0	3.03801e-05	5.51228e-06	0.000824063	5.01731e-05	0.000928721	4.29555e-05	0.000831771	0.000483847	0.000204009	0.000182371	0.000375573	4.13317e-05
Viral_bacteria__Siphoviridae Siphoviridae_Unclassified__Lactobacillus phage LF1	3.20063e-05	0	7.08868e-05	2.75614e-05	5.15039e-05	0.000275952	0.0011609	1.07389e-05	0.000211243	0.000360072	3.54799e-05	9.35235e-07	0.000112672	8.26634e-05
Viral_bacteria__Siphoviridae Siphoviridae_Unclassified__Lactobacillus phage LfeSau	0	6.39304e-06	8.10135e-05	0.000209467	5.15039e-05	0.000225779	0.000619147	1.61083e-05	0.000422487	4.50091e-05	0.00320206	1.68342e-05	0.00135206	2.06659e-05
Viral_bacteria__Siphoviridae Siphoviridae_Unclassified__Lactobacillus phage LL-H	0.00928392	0	1.01267e-05	0	2.5752e-05	0	7.73934e-05	3.57962e-06	0.000132027	2.25045e-05	0.000195139	3.74094e-06	3.75573e-05	0
Viral_bacteria__Siphoviridae Siphoviridae_Unclassified__Lactobacillus phage Lrm1	6.82101e-06	0	2.02534e-05	1.65369e-05	0.000154512	2.50865e-05	0.000541754	1.61083e-05	0.000660136	0.000315063	0.00893206	2.8057e-05	0.000325496	2.06659e-05
Viral_bacteria__Siphoviridae Siphoviridae_Unclassified__Lactobacillus phage Lv-1	9.12966e-05	6.39304e-06	0	0	0	0	0.00255398	1.43185e-05	0.000303662	0.000135027	7.98297e-05	1.49638e-05	0.000287939	0
Viral_bacteria__Siphoviridae Siphoviridae_Unclassified__Lactobacillus phage phiadh	5.24693e-07	0	3.03801e-05	0.000176393	0.000412031	5.01731e-05	7.73934e-05	8.23313e-05	7.92163e-05	2.25045e-05	0.00103779	1.40285e-05	6.25955e-05	2.06659e-05
Viral_bacteria__Siphoviridae Siphoviridae_Unclassified__Lactobacillus phage phig1e	1.46914e-05	6.39304e-06	0	1.10246e-05	0	0	0	3.57962e-06	5.28109e-05	0	0.00799184	0	2.50382e-05	8.26634e-05
Viral_bacteria__Siphoviridae Siphoviridae_Unclassified__Lactobacillus phage phiJB	0.0148798	0	6.07601e-05	8.26843e-05	0	5.01731e-05	0.00023218	3.57962e-06	0.000977001	1.12523e-05	1.77399e-05	1.87047e-06	6.25955e-05	0.000165327
Viral_bacteria__Siphoviridae Siphoviridae_Unclassified__Lactobacillus phage phiPYB5	4.19754e-06	0	0	5.51228e-06	0	5.01731e-05	0.000309574	1.78981e-06	0.00014523	0.000326316	5.32198e-05	0.000341361	6.25955e-05	6.19976e-05
Viral_bacteria__Siphoviridae Siphoviridae_Unclassified__Lactobacillus phage PLE2	1.04939e-06	0	2.02534e-05	1.10246e-05	0	0	0.000154787	7.15925e-06	0.000132027	0.000585118	0.000133049	0	0.000237863	0
Viral_bacteria__Siphoviridae Siphoviridae_Unclassified__Lactobacillus phage Sha1	0.00125297	1.27861e-05	5.06334e-05	4.40983e-05	0	0	0	1.78981e-05	1.32027e-05	0.000135027	2.66099e-05	9.35235e-07	0	6.19976e-05
Viral_bacteria__Siphoviridae Siphoviridae_Unclassified__Lactobacillus prophage Lj928	3.67285e-06	0	0.000192407	0.000154344	0	0	7.73934e-05	1.07389e-05	0.00100341	3.37568e-05	0.000248359	2.8057e-06	3.75573e-05	0
Viral_bacteria__Siphoviridae Siphoviridae_Unclassified__Lactobacillus prophage Lj965	0	0	0.00024304	0.000220491	2.5752e-05	2.50865e-05	0.000773934	1.07389e-05	0.00161073	4.50091e-05	0.000141919	1.12228e-05	0.000100153	0.000103329
Viral_bacteria__Siphoviridae Siphoviridae_Unclassified__Lactococcus phage 1358	8.39509e-05	0	1.01267e-05	5.51228e-06	2.5752e-05	0	0.000309574	7.15925e-06	0.000343271	0.00010127	0.000150789	9.35235e-07	6.25955e-05	0.000123995
Viral_bacteria__Siphoviridae Siphoviridae_Unclassified__Lactococcus phage 1706	0	0	0	1.10246e-05	0.00136485	0.000827856	0.00023218	0.0380621	0.000990204	0.000112523	0.0017119	1.77695e-05	0.00231603	0.000206659
Viral_bacteria__Siphoviridae Siphoviridae_Unclassified__Lactococcus phage 28201	7.3457e-06	0	1.01267e-05	4.96106e-05	2.5752e-05	7.52596e-05	0.00023218	2.32676e-05	0.00183518	0.000630127	0.000230619	1.40285e-05	0.00101405	0.00185993
Viral_bacteria__Siphoviridae Siphoviridae_Unclassified__Lactococcus phage 340	9.44448e-06	1.91791e-05	0.000111394	0.000104733	0.000360527	0.000200692	0.000696541	0.000114548	0.000264054	2.25045e-05	0.000221749	1.40285e-05	5.00764e-05	0.00024799
Viral_bacteria__Siphoviridae Siphoviridae_Unclassified__Lactococcus phage 50101	0.00246186	6.39304e-05	4.05067e-05	3.8586e-05	2.5752e-05	0.000100346	0.00982896	0.00214598	0.0214412	0.00100145	0.00227071	7.01426e-05	0.000951451	0.00154994
Viral_bacteria__Siphoviridae Siphoviridae_Unclassified__Lactococcus phage 63301	1.31173e-05	0	4.05067e-05	2.75614e-05	0	2.50865e-05	0.00147047	0.000601377	0.0019408	0.000213793	0.000886997	0	0.000100153	0.00138461
Viral_bacteria__Siphoviridae Siphoviridae_Unclassified__Lactococcus phage 949	1.04939e-06	0	5.06334e-05	5.51228e-05	5.15039e-05	5.01731e-05	0.00216701	7.15925e-06	0.000382879	0.000315063	1.77399e-05	2.52513e-05	3.75573e-05	0.000309988
Viral_bacteria__Siphoviridae Siphoviridae_Unclassified__Lactococcus phage 98201	2.30865e-05	0	2.02534e-05	6.06351e-05	0	0.000326125	7.73934e-05	8.94906e-06	0.000409284	0.000236298	0.000957956	1.68342e-05	0.00146473	0.00121929
Viral_bacteria__Siphoviridae Siphoviridae_Unclassified__Lactococcus phage bIL285	0.000129075	6.39304e-06	7.08868e-05	2.20491e-05	2.5752e-05	0.00356229	0.00634626	4.83249e-05	0.00129387	0.00601996	0.000665247	1.5899e-05	0.00192794	0.00376119
Viral_bacteria__Siphoviridae Siphoviridae_Unclassified__Lactococcus phage bIL286	3.72532e-05	1.27861e-05	8.10135e-05	5.51228e-06	2.5752e-05	0	0	1.43185e-05	9.2419e-05	4.50091e-05	5.32198e-05	0	6.25955e-05	0.0115315
Viral_bacteria__Siphoviridae Siphoviridae_Unclassified__Lactococcus phage bIL309	1.62655e-05	1.91791e-05	9.11402e-05	0	0	0	0.000386967	7.15925e-06	0.00281218	2.25045e-05	8.86997e-05	5.61141e-06	0.00013771	0.00161194
Viral_bacteria__Siphoviridae Siphoviridae_Unclassified__Lactococcus phage bIL310	4.6173e-05	1.27861e-05	0.000111394	7.7172e-05	2.5752e-05	0	0.000154787	1.78981e-06	0.000250852	0.000112523	4.43498e-05	2.8057e-06	0.000287939	0.0238484
Viral_bacteria__Siphoviridae Siphoviridae_Unclassified__Lactococcus phage bIL311	3.67285e-06	0	2.02534e-05	2.20491e-05	2.5752e-05	0	0.000154787	0	3.96081e-05	4.50091e-05	3.54799e-05	9.35235e-07	5.00764e-05	0.000661307
Viral_bacteria__Siphoviridae Siphoviridae_Unclassified__Lactococcus phage bIL312	1.83643e-05	6.39304e-06	5.06334e-05	4.96106e-05	0	0.000150519	0	1.43185e-05	0.000303662	0.000213793	8.86997e-05	9.35235e-07	0.00013771	0.00386451
Viral_bacteria__Siphoviridae Siphoviridae_Unclassified__Lactococcus phage BK5-T	1.8889e-05	0	4.05067e-05	4.40983e-05	2.5752e-05	0	0.000154787	5.36944e-06	0.000514906	6.75136e-05	1.77399e-05	5.61141e-06	0.00164	0.0116762
Viral_bacteria__Siphoviridae Siphoviridae_Unclassified__Lactococcus phage BM13	4.19754e-06	0	3.03801e-05	3.30737e-05	2.5752e-05	0.000150519	0.00208962	1.43185e-05	0.000422487	0.000540109	0.0158861	2.15104e-05	0.000488245	0.00103329
Viral_bacteria__Siphoviridae Siphoviridae_Unclassified__Lactococcus phage jm2	5.77162e-06	0	5.06334e-05	2.75614e-05	0.000283272	0.000225779	0.000309574	4.29555e-05	0.000132027	0	1.77399e-05	9.35235e-06	2.50382e-05	6.19976e-05
Viral_bacteria__Siphoviridae Siphoviridae_Unclassified__Lactococcus phage jm3	1.57408e-06	0	7.08868e-05	3.30737e-05	0.000154512	2.50865e-05	0.000154787	3.57962e-05	1.32027e-05	0	5.32198e-05	7.48188e-06	0	2.06659e-05
Viral_bacteria__Siphoviridae Siphoviridae_Unclassified__Lactococcus phage P078	5.24693e-06	0	1.01267e-05	3.30737e-05	0.00218892	0.000451558	0.000696541	0.0336377	0.00161073	0.000393829	0.00306901	4.86322e-05	0.00284183	2.06659e-05
Viral_bacteria__Siphoviridae Siphoviridae_Unclassified__Lactococcus phage P087	1.31173e-05	1.27861e-05	6.07601e-05	0.000214979	7.72559e-05	0.000200692	0.000619147	2.68472e-05	0.00114864	0.00119274	0.000186269	2.8057e-06	0.000863817	0.00109529
Viral_bacteria__Siphoviridae Siphoviridae_Unclassified__Lactococcus phage P092	0	0	0	0	2.5752e-05	5.01731e-05	0	7.69619e-05	0.000158433	0.000123775	0	9.35235e-07	0.00082626	0
Viral_bacteria__Siphoviridae Siphoviridae_Unclassified__Lactococcus phage P118	3.67285e-06	0	0	5.51228e-06	7.72559e-05	0	0.00023218	0.000184351	5.28109e-05	1.12523e-05	8.86997e-06	3.74094e-06	0.000325496	0
Viral_bacteria__Siphoviridae Siphoviridae_Unclassified__Lactococcus phage P162	0	0	0	0	5.15039e-05	0	0	7.51721e-05	0.000237649	0	0	0	5.00764e-05	2.06659e-05
Viral_bacteria__Siphoviridae Siphoviridae_Unclassified__Lactococcus phage P335 sensu lato	9.44448e-06	0	0	1.10246e-05	0	0	7.73934e-05	1.78981e-06	0.00014523	4.50091e-05	0.000292709	3.74094e-06	8.76336e-05	0.00746037
Viral_bacteria__Siphoviridae Siphoviridae_Unclassified__Lactococcus phage P680	3.14816e-06	1.91791e-05	0.000162027	3.30737e-05	0.000231768	0.000100346	0.000154787	5.01147e-05	2.64054e-05	0	8.86997e-06	1.21581e-05	1.25191e-05	0.000144661
Viral_bacteria__Siphoviridae Siphoviridae_Unclassified__Lactococcus phage phi7	1.04939e-06	6.39304e-06	0.000101267	6.61474e-05	0.000154512	0.000125433	0.00023218	3.04268e-05	0.000237649	1.12523e-05	0.000478978	2.8057e-06	6.25955e-05	0.000123995
Viral_bacteria__Siphoviridae Siphoviridae_Unclassified__Lactococcus phage phiL47	1.20679e-05	0	1.01267e-05	2.75614e-05	5.15039e-05	0	0.000696541	3.40064e-05	0.000369676	1.12523e-05	4.43498e-05	9.35235e-07	0.000175267	0.000619976
Viral_bacteria__Siphoviridae Siphoviridae_Unclassified__Lactococcus phage phiLC3	6.29632e-06	6.39304e-06	3.03801e-05	5.51228e-06	0	0	0.00023218	5.36944e-06	0.000250852	3.37568e-05	4.43498e-05	5.61141e-06	6.25955e-05	0.000330654
Viral_bacteria__Siphoviridae Siphoviridae_Unclassified__Lactococcus phage PLgT-1	4.51236e-05	0	8.10135e-05	2.75614e-05	0	5.01731e-05	0.000154787	3.57962e-06	6.60136e-05	0.00010127	0.00012418	3.74094e-06	6.25955e-05	0.0167187
Viral_bacteria__Siphoviridae Siphoviridae_Unclassified__Lactococcus phage Q54	5.77162e-06	0	9.11402e-05	0.000154344	0.000824063	0.00137976	0.000541754	2.68472e-05	0.000620528	0.00217169	0.000310449	0.000105682	0.00132702	0.000433983
Viral_bacteria__Siphoviridae Siphoviridae_Unclassified__Lactococcus phage r1t	8.39509e-06	6.39304e-06	1.01267e-05	5.51228e-06	2.5752e-05	0	0.0023992	0.000125287	0.0108526	0	4.43498e-05	4.67617e-06	3.75573e-05	0.00101263
Viral_bacteria__Siphoviridae Siphoviridae_Unclassified__Lactococcus phage TP901-1	0.000468026	7.03235e-05	0.00127596	0.000154344	0	2.50865e-05	0.000541754	4.65351e-05	0.00207283	0.000270054	0.00165868	1.77695e-05	0.00210321	0.0189506
Viral_bacteria__Siphoviridae Siphoviridae_Unclassified__Lactococcus phage Tuc2009	1.20679e-05	0	3.03801e-05	3.30737e-05	0.000103008	2.50865e-05	0.00108351	2.32676e-05	0.000752555	0.000112523	0.0125333	1.5899e-05	0.000938932	0.140404
Viral_bacteria__Siphoviridae Siphoviridae_Unclassified__Lactococcus phage ul36	2.62347e-06	0	9.11402e-05	3.30737e-05	2.5752e-05	0	7.73934e-05	1.78981e-05	0.00176916	0.00010127	0.000195139	5.61141e-06	0.00210321	0.00727438
Viral_bacteria__Siphoviridae Siphoviridae_Unclassified__Lactococcus phage WRP3	6.29632e-06	0	1.01267e-05	9.37088e-05	0	5.01731e-05	7.73934e-05	0	3.96081e-05	0	3.54799e-05	3.74094e-06	0	0.000206659
Viral_bacteria__Siphoviridae Siphoviridae_Unclassified__Leuconostoc phage 1-A4	1.04939e-06	0	0	0	2.5752e-05	0	0.000154787	2.68472e-05	1.32027e-05	0	8.86997e-06	0	2.50382e-05	0
Viral_bacteria__Siphoviridae Siphoviridae_Unclassified__Leuconostoc phage Lmd1	5.24693e-07	0	0	0	0	0	0	0.000486829	0	5.62613e-05	8.86997e-06	0	0	0
Viral_bacteria__Siphoviridae Siphoviridae_Unclassified__Leuconostoc phage Ln-9	0	0	0	0	0	0	0.00046436	7.15925e-06	0	0	0	9.35235e-07	2.50382e-05	0
Viral_bacteria__Siphoviridae Siphoviridae_Unclassified__Leuconostoc phage P793	1.04939e-06	0	0	0	2.5752e-05	0	0	0.000195089	0	9.00181e-05	0	0	0	0
Viral_bacteria__Siphoviridae Siphoviridae_Unclassified__Leuconostoc phage phiLN03	0	0	0	0	0	0	0	0.000232676	0	4.50091e-05	8.86997e-06	9.35235e-07	0	0
Viral_bacteria__Siphoviridae Siphoviridae_Unclassified__Leuconostoc phage phiLN34	5.24693e-07	0	0	1.10246e-05	0	0	0.000541754	6.26434e-05	0	0	0	0	0	0
Viral_bacteria__Siphoviridae Siphoviridae_Unclassified__Listeria phage 2389	0.00380403	0	0	1.10246e-05	7.72559e-05	5.01731e-05	0.000386967	2.68472e-05	2.64054e-05	2.25045e-05	1.77399e-05	1.87047e-06	3.75573e-05	0
Viral_bacteria__Siphoviridae Siphoviridae_Unclassified__Listeria phage A006	0.00267698	0	2.02534e-05	2.75614e-05	0.000231768	0.000576991	0.00139308	1.61083e-05	0.00104301	0.000157532	0.00651943	0.000110358	0.000863817	0
Viral_bacteria__Siphoviridae Siphoviridae_Unclassified__Listeria phage A118	0.000259198	0	0	0	0	0	7.73934e-05	5.36944e-06	0.00029046	1.12523e-05	1.77399e-05	2.8057e-06	0.00013771	0
Viral_bacteria__Siphoviridae Siphoviridae_Unclassified__Listeria phage A500	0.000433397	6.39304e-06	0	1.10246e-05	7.72559e-05	0.000100346	0.000619147	1.07389e-05	1.32027e-05	7.87659e-05	0.00010644	2.8057e-06	0.000112672	2.06659e-05
Viral_bacteria__Siphoviridae Siphoviridae_Unclassified__Listeria phage B025	0.000488489	0	5.06334e-05	5.51228e-06	0	0	0.000154787	1.61083e-05	0.00014523	0.000798911	0.000390279	1.87047e-06	3.75573e-05	0
Viral_bacteria__Siphoviridae Siphoviridae_Unclassified__Listeria phage B054	0.000158457	1.91791e-05	5.06334e-05	0.000143319	0.000103008	5.01731e-05	0.00131569	2.68472e-05	0.000620528	0.000607622	0.000532198	2.71218e-05	0.000375573	0.000123995
Viral_bacteria__Siphoviridae Siphoviridae_Unclassified__Listeria phage LP-030-3	1.46914e-05	0	0	5.51228e-06	2.5752e-05	0	7.73934e-05	0	0.000831771	6.75136e-05	0.000274969	9.35235e-07	6.25955e-05	0
Viral_bacteria__Siphoviridae Siphoviridae_Unclassified__Listeria phage LP-101	0.000148488	0	2.02534e-05	5.51228e-06	0	0	0.000154787	7.15925e-06	0.000132027	0.000438838	0.00415114	1.87047e-06	1.25191e-05	0
Viral_bacteria__Siphoviridae Siphoviridae_Unclassified__Listeria phage P35	0	0	0	0	0.00025752	0	0	8.94906e-06	0.00322146	7.87659e-05	1.77399e-05	1.87047e-06	6.25955e-05	0
Viral_bacteria__Siphoviridae Siphoviridae_Unclassified__Listeria phage P40	5.24693e-07	6.39304e-06	0	5.51228e-06	0	2.50865e-05	0.000154787	7.15925e-06	7.92163e-05	0.000315063	0.00143693	2.8057e-06	5.00764e-05	0
Viral_bacteria__Siphoviridae Siphoviridae_Unclassified__Listeria phage vB_LmoS_188	0.0026859	0	0	5.51228e-06	0	2.50865e-05	0.000154787	2.68472e-05	0.00014523	1.12523e-05	9.75696e-05	8.41711e-06	0.000801222	0
Viral_bacteria__Siphoviridae Siphoviridae_Unclassified__Listonella phage phiHSIC	0	0	0	0	0	0.000275952	0	3.57962e-06	0	1.12523e-05	0	0	0.00136458	0
Viral_bacteria__Siphoviridae Siphoviridae_Unclassified__Microbacterium phage Min1	2.30865e-05	1.91791e-05	0.000141774	5.51228e-05	0.000540791	0.000200692	7.73934e-05	5.19045e-05	0.000396081	3.37568e-05	4.43498e-05	7.48188e-06	0.000200305	0.00268656
Viral_bacteria__Siphoviridae Siphoviridae_Unclassified__Microbacterium phage vB_MoxS-ISF9	0	0	0	0	0.00012876	2.50865e-05	0	0	0.00109583	0	8.86997e-06	6.07903e-05	0.0193545	0
Viral_bacteria__Siphoviridae Siphoviridae_Unclassified__Mycobacterium phage 40AC	0	0	1.01267e-05	5.51228e-06	2.5752e-05	2.50865e-05	0	7.15925e-06	2.64054e-05	0.000652631	3.54799e-05	4.02151e-05	3.75573e-05	0.000103329
Viral_bacteria__Siphoviridae Siphoviridae_Unclassified__Mycobacterium phage Adzzy	5.24693e-07	0	0	5.51228e-06	0	0	0	0	0.000105622	0	0.00110875	0	5.00764e-05	0
Viral_bacteria__Siphoviridae Siphoviridae_Unclassified__Mycobacterium phage AnnaL29	0	0	0	0	0	7.52596e-05	0.00023218	1.78981e-06	0	0.00232922	3.54799e-05	0.000110358	0.000162748	0
Viral_bacteria__Siphoviridae Siphoviridae_Unclassified__Mycobacterium phage ArcherNM	0	0	0	0	0	0.00363755	0.000309574	0	0	0.000112523	7.98297e-05	0.000189853	0.00082626	0
Viral_bacteria__Siphoviridae Siphoviridae_Unclassified__Mycobacterium phage Artemis2UCLA	1.04939e-06	0	0	0	0	0.000401385	0	1.78981e-06	2.64054e-05	4.50091e-05	2.66099e-05	1.96399e-05	0.000125191	6.19976e-05
Viral_bacteria__Siphoviridae Siphoviridae_Unclassified__Mycobacterium phage Bactobuster	0	0	0	0	0	5.01731e-05	7.73934e-05	0	1.32027e-05	0.000157532	2.66099e-05	0.000549918	0.000112672	2.06659e-05
Viral_bacteria__Siphoviridae Siphoviridae_Unclassified__Mycobacterium phage BarrelRoll	0	0	0	5.51228e-06	0	7.52596e-05	0	0	0.000132027	0	8.86997e-06	0	0.00151481	0
Viral_bacteria__Siphoviridae Siphoviridae_Unclassified__Mycobacterium phage Blue7	0	0	0	5.51228e-06	0	0.000326125	0.000309574	0	0	3.37568e-05	8.86997e-06	2.99275e-05	1.25191e-05	0
Viral_bacteria__Siphoviridae Siphoviridae_Unclassified__Mycobacterium phage Bobi	0	0	0	5.51228e-06	0	0	0	1.78981e-06	0	0	0	0.000738836	0	0
Viral_bacteria__Siphoviridae Siphoviridae_Unclassified__Mycobacterium phage Brocalys	0	0	0	0	0	0	0.000773934	1.78981e-06	2.64054e-05	0	0.000842647	0	0	0
Viral_bacteria__Siphoviridae Siphoviridae_Unclassified__Mycobacterium phage BTCU-1	0	0	0	0	0	0.0188149	0	1.25287e-05	1.32027e-05	3.37568e-05	0.000514458	0.000250643	0.00199054	0
Viral_bacteria__Siphoviridae Siphoviridae_Unclassified__Mycobacterium phage Cabrinians	5.24693e-07	0	4.05067e-05	5.51228e-06	0	0	0	0	0.000118824	3.37568e-05	0.000576548	0	0	0
Viral_bacteria__Siphoviridae Siphoviridae_Unclassified__Mycobacterium phage Cambiare	0	6.39304e-06	0	0	0	0	0	1.61083e-05	1.32027e-05	0	0.000399148	0	0	0
Viral_bacteria__Siphoviridae Siphoviridae_Unclassified__Mycobacterium phage Catalina	0	0	0	0	0	5.01731e-05	0.000696541	1.78981e-06	6.60136e-05	0.000146279	0.000150789	4.20856e-05	0.000338015	0
Viral_bacteria__Siphoviridae Siphoviridae_Unclassified__Mycobacterium phage Cheetobro	0	0	0	5.51228e-06	2.5752e-05	0	7.73934e-05	3.57962e-06	3.96081e-05	3.37568e-05	3.54799e-05	0.000120645	0	0
Viral_bacteria__Siphoviridae Siphoviridae_Unclassified__Mycobacterium phage Dori	1.57408e-06	0	0	2.75614e-05	0	0	0.000696541	5.36944e-06	1.32027e-05	3.37568e-05	0	2.8057e-06	0.000112672	0
Viral_bacteria__Siphoviridae Siphoviridae_Unclassified__Mycobacterium phage EagleEye	5.24693e-07	0	2.02534e-05	0	0.000154512	0	0	0	6.60136e-05	7.87659e-05	0	1.87047e-06	1.25191e-05	2.06659e-05
Viral_bacteria__Siphoviridae Siphoviridae_Unclassified__Mycobacterium phage Estave1	1.57408e-06	0	0	0	0	0	0	0	0	0	0.000221749	0	0	6.19976e-05
Viral_bacteria__Siphoviridae Siphoviridae_Unclassified__Mycobacterium phage Gengar	5.24693e-07	0	0	0	0.000489287	0	0.00224441	1.78981e-06	0.000607325	0	0	8.32359e-05	5.00764e-05	6.19976e-05
Viral_bacteria__Siphoviridae Siphoviridae_Unclassified__Mycobacterium phage Hades	5.24693e-07	0	0	0	0	0	0	0	0.000580919	0	2.66099e-05	0	5.00764e-05	0
Viral_bacteria__Siphoviridae Siphoviridae_Unclassified__Mycobacterium phage HINdeR	5.24693e-07	0	0	0	0	0.000250865	0	0	0	0.00136152	0.000319319	4.86322e-05	0.000513283	0
Viral_bacteria__Siphoviridae Siphoviridae_Unclassified__Mycobacterium phage Iracema64	5.24693e-07	0	0	0	0	0.00145502	0.000154787	1.78981e-06	0	1.12523e-05	0.00012418	3.64742e-05	0.000225344	0
Viral_bacteria__Siphoviridae Siphoviridae_Unclassified__Mycobacterium phage Jobu08	0	0	0	0	0	0.000301039	0.00046436	1.78981e-06	0.000118824	0.000573865	2.66099e-05	0.000726678	0.000312977	0
Viral_bacteria__Siphoviridae Siphoviridae_Unclassified__Mycobacterium phage Jolie2	0	0	0	0	0	0	0	0	0.000264054	0	0	1.96399e-05	0	0
Viral_bacteria__Siphoviridae Siphoviridae_Unclassified__Mycobacterium phage Kampy	0	0	0	0	0	2.50865e-05	0	0	0	0.000371325	1.77399e-05	0.000163666	2.50382e-05	0
Viral_bacteria__Siphoviridae Siphoviridae_Unclassified__Mycobacterium phage Lamina13	0	0	0	0	0	0	0	0	0.000224446	0	0	0	0	0
Viral_bacteria__Siphoviridae Siphoviridae_Unclassified__Mycobacterium phage Lolly9	5.24693e-07	0	0	0	0	2.50865e-05	0	7.15925e-05	0.000422487	0	0.00125954	0	2.50382e-05	0
Viral_bacteria__Siphoviridae Siphoviridae_Unclassified__Mycobacterium phage Loser	0	0	0	0	0	0	0	0	1.32027e-05	5.62613e-05	0	0.000223521	5.00764e-05	0
Viral_bacteria__Siphoviridae Siphoviridae_Unclassified__Mycobacterium phage Makemake	0	0	0	0	0	0	0.000773934	0	2.64054e-05	0	0	1.87047e-06	0	0
Viral_bacteria__Siphoviridae Siphoviridae_Unclassified__Mycobacterium phage Minerva	5.24693e-07	0	2.02534e-05	2.20491e-05	0	0	7.73934e-05	3.57962e-06	1.32027e-05	0.00034882	1.77399e-05	1.68342e-05	1.25191e-05	0.000165327
Viral_bacteria__Siphoviridae Siphoviridae_Unclassified__Mycobacterium phage MOOREtheMARYer	0	0	0	0	0	0	0	0.000134236	0	0	0.00887884	2.8057e-06	0	0
Viral_bacteria__Siphoviridae Siphoviridae_Unclassified__Mycobacterium phage Mulciber	0	0	0	0	7.72559e-05	7.52596e-05	0	3.57962e-06	0	1.12523e-05	8.86997e-06	0.000115034	0.0155988	0
Viral_bacteria__Siphoviridae Siphoviridae_Unclassified__Mycobacterium phage Murucutumbu	1.04939e-06	0	0	0	2.5752e-05	0	0	0	0	0	0	0	0	0.000185993
Viral_bacteria__Siphoviridae Siphoviridae_Unclassified__Mycobacterium phage Omnicron	0	0	0	1.10246e-05	0.000283272	0	0	0	1.32027e-05	0	0	2.8057e-06	0	0
Viral_bacteria__Siphoviridae Siphoviridae_Unclassified__Mycobacterium phage PegLeg	1.20679e-05	0	4.05067e-05	2.20491e-05	2.5752e-05	0	0	1.78981e-06	0	0	8.86997e-06	0	1.25191e-05	0.000330654
Viral_bacteria__Siphoviridae Siphoviridae_Unclassified__Mycobacterium phage Pepe	0	0	0	0	0	0	0.000154787	0	0	0	0	0	0	0
Viral_bacteria__Siphoviridae Siphoviridae_Unclassified__Mycobacterium phage Phantastic	0	0	0	0	0	0.000150519	7.73934e-05	0	2.64054e-05	0.000191288	0.000283839	7.10779e-05	0.000325496	0
Viral_bacteria__Siphoviridae Siphoviridae_Unclassified__Mycobacterium phage Phaux	0	0	0	0	0	0	0	8.94906e-06	0	2.25045e-05	0.00010644	0	1.25191e-05	0
Viral_bacteria__Siphoviridae Siphoviridae_Unclassified__Mycobacterium phage Pioneer	0	0	0	0	0	0.000125433	0.000928721	3.57962e-06	1.32027e-05	1.12523e-05	4.43498e-05	0.000126257	0.000312977	0
Viral_bacteria__Siphoviridae Siphoviridae_Unclassified__Mycobacterium phage RhynO	1.57408e-06	0	0	5.51228e-06	0	5.01731e-05	0	5.36944e-06	3.96081e-05	7.87659e-05	4.43498e-05	0.000512509	6.25955e-05	2.06659e-05
Viral_bacteria__Siphoviridae Siphoviridae_Unclassified__Mycobacterium phage Rufus	0	0	0	0	0	0	7.73934e-05	0	0.00369676	0	0	0	0	0
Viral_bacteria__Siphoviridae Siphoviridae_Unclassified__Mycobacterium phage ShedlockHolmes	0	0	0	0	0	0	0	0	0.000158433	0	0	2.8057e-06	0	0
Viral_bacteria__Siphoviridae Siphoviridae_Unclassified__Mycobacterium phage Sheen	0	0	0	0	0	0.000476644	0.000386967	1.78981e-06	1.32027e-05	0.000112523	4.43498e-05	0.000373159	0.000187786	2.06659e-05
Viral_bacteria__Siphoviridae Siphoviridae_Unclassified__Mycobacterium phage VohminGhazi	0	0	0	0	0	5.01731e-05	0	0	0	1.12523e-05	2.66099e-05	9.35235e-07	0.000325496	0
Viral_bacteria__Siphoviridae Siphoviridae_Unclassified__Mycobacterium phage Wile	0	0	0	0	0	0.00160554	0.000154787	1.78981e-06	2.64054e-05	0.000258802	6.20898e-05	7.5754e-05	0.000262901	0
Viral_bacteria__Siphoviridae Siphoviridae_Unclassified__Nocardia phage NBR1	0	0	0	1.65369e-05	2.5752e-05	0	0.00023218	8.94906e-06	1.32027e-05	1.12523e-05	2.66099e-05	1.68342e-05	0	2.06659e-05
Viral_bacteria__Siphoviridae Siphoviridae_Unclassified__Paenibacillus phage Fern	0	0	0	2.20491e-05	5.15039e-05	0.000426471	0.00154787	0	0	0.000135027	0	1.87047e-06	0.000237863	0
Viral_bacteria__Siphoviridae Siphoviridae_Unclassified__Paenibacillus phage PG1	0	0	0	5.51228e-06	0.000103008	0.000150519	0.000386967	1.43185e-05	0.000950595	0.00692014	0.000168529	1.21581e-05	0.000500764	4.13317e-05
Viral_bacteria__Siphoviridae Siphoviridae_Unclassified__Paenibacillus phage Tripp	1.57408e-06	1.27861e-05	4.05067e-05	6.06351e-05	0	0.000150519	0.000154787	8.94906e-06	9.2419e-05	0.000112523	8.86997e-05	9.35235e-07	0.00110168	0
Viral_bacteria__Siphoviridae Siphoviridae_Unclassified__Paenibacillus phage Vegas	1.57408e-06	6.39304e-06	2.02534e-05	0.000110246	0.00126185	0.000451558	0.0167944	0.0010721	0.0259961	0.00119274	0.0011531	8.51064e-05	0.000638474	0.000103329
Viral_bacteria__Siphoviridae Siphoviridae_Unclassified__Paenibacillus phage Xenia	1.20679e-05	0	5.06334e-05	0.000181905	5.15039e-05	0.000150519	0.00023218	7.15925e-06	0.00203322	0.000675136	0.000204009	3.74094e-06	0.00068855	0.000144661
Viral_bacteria__Siphoviridae Siphoviridae_Unclassified__Pectobacterium phage My1	5.24693e-07	6.39304e-06	0	5.51228e-06	0	0	7.73934e-05	1.78981e-06	0.000118824	1.12523e-05	3.54799e-05	2.8057e-06	2.50382e-05	8.26634e-05
Viral_bacteria__Siphoviridae Siphoviridae_Unclassified__Propionibacterium phage Enoki	0	0	1.01267e-05	0	0	0	0.00046436	0	0	0	8.86997e-06	0	0	2.06659e-05
Viral_bacteria__Siphoviridae Siphoviridae_Unclassified__Propionibacterium phage PA1-14	0	0	0	5.51228e-06	0	0	0.000541754	1.78981e-06	0	0	8.86997e-06	4.67617e-06	0	0.000103329
Viral_bacteria__Siphoviridae Siphoviridae_Unclassified__Propionibacterium phage PHL085N00	5.24693e-07	0	1.01267e-05	0	0	0	0	0	0	1.12523e-05	0	9.35235e-07	0	0.000206659
Viral_bacteria__Siphoviridae Siphoviridae_Unclassified__Propionibacterium phage PHL150M00	5.24693e-07	0	0	0	0	0	7.73934e-05	0	0	0	0	0	0	0.000144661
Viral_bacteria__Siphoviridae Siphoviridae_Unclassified__Proteus phage pPM_01	1.04939e-06	0	0	5.51228e-06	0	2.50865e-05	0	0	0.0004885	3.37568e-05	6.20898e-05	0	2.50382e-05	0
Viral_bacteria__Siphoviridae Siphoviridae_Unclassified__Pseudoalteromonas phage H105/1	1.04939e-06	0	1.01267e-05	5.51228e-06	0.000154512	0.000326125	0	1.78981e-06	0.000198041	0.000135027	4.43498e-05	3.74094e-06	0.000125191	0
Viral_bacteria__Siphoviridae Siphoviridae_Unclassified__Pseudomonas phage F10	1.15432e-05	0	1.01267e-05	0	5.15039e-05	2.50865e-05	0.000154787	1.78981e-06	3.96081e-05	3.37568e-05	0.000443498	2.8057e-06	5.00764e-05	0
Viral_bacteria__Siphoviridae Siphoviridae_Unclassified__Pseudomonas phage JBD44	6.82101e-06	6.39304e-06	8.10135e-05	0.000226004	0.000592295	0.00115398	0.000773934	3.40064e-05	0.00106942	0.00202541	0.000425758	0.000101941	0.00127695	2.06659e-05
Viral_bacteria__Siphoviridae Siphoviridae_Unclassified__Pseudomonas phage PAJU2	5.24693e-06	6.39304e-06	0	1.10246e-05	0	5.01731e-05	0	0	0.000158433	0	8.86997e-06	9.35235e-07	0.000112672	2.06659e-05
Viral_bacteria__Siphoviridae Siphoviridae_Unclassified__Pseudomonas phage phi2	5.24693e-07	0	0	5.51228e-06	0	2.50865e-05	7.73934e-05	1.78981e-06	0.000237649	9.00181e-05	0.000283839	2.8057e-06	2.50382e-05	0
Viral_bacteria__Siphoviridae Siphoviridae_Unclassified__Pseudomonas phage phi297	5.24693e-06	0	1.01267e-05	4.40983e-05	0.000206016	0.000376298	7.73934e-05	1.07389e-05	0.000620528	0.000393829	0.000221749	2.71218e-05	0.000350535	6.19976e-05
Viral_bacteria__Siphoviridae Siphoviridae_Unclassified__Pseudomonas phage phiPSA1	3.67285e-06	0	0	3.30737e-05	2.5752e-05	2.50865e-05	0.000928721	3.7586e-05	0.000660136	0.000112523	0.000212879	3.74094e-06	0.00013771	6.19976e-05
Viral_bacteria__Siphoviridae Siphoviridae_Unclassified__Pseudomonas phage PS-1	6.29632e-06	0	0	5.51228e-06	0	0	0	0	0.000184838	2.25045e-05	1.77399e-05	0	1.25191e-05	0
Viral_bacteria__Siphoviridae Siphoviridae_Unclassified__Pseudomonas phage YMC11/07/P54_PAE_BP	8.39509e-06	0	1.01267e-05	4.40983e-05	0.000309023	0.000702423	0.000541754	1.78981e-06	0.000858176	0.000573865	0.00125954	3.74094e-05	0.00366809	0
Viral_bacteria__Siphoviridae Siphoviridae_Unclassified__Rhizobium phage 16-3	1.04939e-06	0	3.03801e-05	0	2.5752e-05	2.50865e-05	0.000154787	1.78981e-06	1.32027e-05	0.00103521	6.20898e-05	9.35235e-07	0.000112672	2.06659e-05
Viral_bacteria__Siphoviridae Siphoviridae_Unclassified__Rhizobium phage vB_RleS_L338C	2.09877e-06	0	3.03801e-05	1.65369e-05	0	0	7.73934e-05	1.78981e-06	0	2.25045e-05	2.66099e-05	0	2.50382e-05	0.000123995
Viral_bacteria__Siphoviridae Siphoviridae_Unclassified__Rhodobacter phage RC1	2.09877e-06	0	0	1.65369e-05	0	0	0	1.78981e-06	2.64054e-05	0.000146279	3.54799e-05	3.74094e-06	6.25955e-05	2.06659e-05
Viral_bacteria__Siphoviridae Siphoviridae_Unclassified__Rhodobacter phage RcapMu	0	0	0	0	2.5752e-05	0.000125433	7.73934e-05	0	5.28109e-05	3.37568e-05	1.77399e-05	1.77695e-05	3.75573e-05	2.06659e-05
Viral_bacteria__Siphoviridae Siphoviridae_Unclassified__Rhodococcus phage REQ2	0	0	0	5.51228e-06	2.5752e-05	0	0	3.57962e-06	0	0	1.77399e-05	0.00013748	1.25191e-05	0
Viral_bacteria__Siphoviridae Siphoviridae_Unclassified__Rhodococcus phage ReqiDocB7	0	0	0	0	0	0	0	3.57962e-06	0	3.37568e-05	0.000851517	6.26607e-05	2.50382e-05	0
Viral_bacteria__Siphoviridae Siphoviridae_Unclassified__Riemerella phage RAP44	2.62347e-06	0	0	7.16597e-05	0.000515039	0.00065225	0.00162526	8.23313e-05	0.000752555	0.000663884	0.0051091	0.000272153	0.000763665	0
Viral_bacteria__Siphoviridae Siphoviridae_Unclassified__Ruegeria phage DSS3-P1	5.24693e-07	0	2.02534e-05	0	0	0	7.73934e-05	3.57962e-06	0.000171635	1.12523e-05	1.77399e-05	0	3.75573e-05	0
Viral_bacteria__Siphoviridae Siphoviridae_Unclassified__Salmonella phage 36	1.99383e-05	0.00125304	0.000354434	0.00256872	0	0	0	0	0	0	0	0	0	0
Viral_bacteria__Siphoviridae Siphoviridae_Unclassified__Salmonella phage BPS11Q3	0	0	0.000131647	0.00128987	0	0	0	0	0	0	0	0	0	0
Viral_bacteria__Siphoviridae Siphoviridae_Unclassified__Salmonella phage IME207	2.62347e-06	6.39304e-06	0	0	0	0	0.000851327	0	0	1.12523e-05	2.66099e-05	0	0	0
Viral_bacteria__Siphoviridae Siphoviridae_Unclassified__Salmonella phage phSE-2	2.67593e-05	0.00067127	0.000334181	0.00210018	0	0	0	0	0	0	0	0	0	4.13317e-05
Viral_bacteria__Siphoviridae Siphoviridae_Unclassified__Salmonella phage SPN3UB	8.91978e-06	0	0	0	0	0	7.73934e-05	1.78981e-06	0.00118824	1.12523e-05	8.86997e-06	9.35235e-07	0	0
Viral_bacteria__Siphoviridae Siphoviridae_Unclassified__Salmonella phage SSU5	1.73149e-05	0	3.03801e-05	2.20491e-05	0	5.01731e-05	0.000154787	8.94906e-06	0.00029046	0.000168784	9.75696e-05	0	0.000150229	0.000165327
Viral_bacteria__Siphoviridae Siphoviridae_Unclassified__Salmonella phage vB_SosS_Oslo	2.46606e-05	1.27861e-05	5.06334e-05	1.10246e-05	0	5.01731e-05	7.73934e-05	3.40064e-05	0.000277257	0	0.015416	1.87047e-06	0.00013771	4.13317e-05
Viral_bacteria__Siphoviridae Siphoviridae_Unclassified__Salmonella phage Vi II-E1	5.24693e-07	0.000121468	8.10135e-05	0.00050713	0	0	0	1.78981e-06	1.32027e-05	2.25045e-05	2.66099e-05	0	0	0
Viral_bacteria__Siphoviridae Siphoviridae_Unclassified__Serratia phage Eta	2.62347e-06	0	5.06334e-05	0.000270102	0	0	0	0	0	3.37568e-05	0	0	3.75573e-05	0
Viral_bacteria__Siphoviridae Siphoviridae_Unclassified__Shigella phage pSf-1	0.00191146	0.0951157	0.0379244	0.245451	2.5752e-05	0	0	0	2.64054e-05	0	8.86997e-06	0	2.50382e-05	0.00132261
Viral_bacteria__Siphoviridae Siphoviridae_Unclassified__Sinorhizobium phage phiLM21	0	0	0	1.10246e-05	5.15039e-05	2.50865e-05	0	3.57962e-06	0.000105622	0.00010127	0.000310449	2.8057e-06	2.50382e-05	0
Viral_bacteria__Siphoviridae Siphoviridae_Unclassified__Staphylococcus phage 2638A	4.82718e-05	0	1.01267e-05	3.8586e-05	5.15039e-05	0	0.00162526	3.40064e-05	0.00142589	0.000202541	0.000168529	5.61141e-06	0.00013771	0.000165327
Viral_bacteria__Siphoviridae Siphoviridae_Unclassified__Staphylococcus phage DW2	5.24693e-07	0	0	5.51228e-06	0.000206016	0.000100346	0.000696541	1.78981e-06	0.000910987	0.000146279	5.32198e-05	8.97826e-05	0.000212825	6.19976e-05
Viral_bacteria__Siphoviridae Siphoviridae_Unclassified__Staphylococcus phage IME-SA4	2.09877e-06	0	4.05067e-05	4.96106e-05	2.5752e-05	0	0.00023218	2.14777e-05	0.000871379	0.000292559	0.000328189	1.02876e-05	0.000763665	0.000165327
Viral_bacteria__Siphoviridae Siphoviridae_Unclassified__Staphylococcus phage JS01	0	0	0	0	0	0	0.00178005	0	2.64054e-05	0	8.86997e-06	0	0	2.06659e-05
Viral_bacteria__Siphoviridae Siphoviridae_Unclassified__Staphylococcus phage phi7401PVL	1.46914e-05	0	1.01267e-05	2.20491e-05	5.15039e-05	0	0.000154787	1.96879e-05	0.000805366	6.75136e-05	0.00010644	9.35235e-07	7.51145e-05	4.13317e-05
Viral_bacteria__Siphoviridae Siphoviridae_Unclassified__Staphylococcus phage phiNM3	0	0	0	5.51228e-06	2.5752e-05	0	0	0	0	0.000123775	1.77399e-05	1.87047e-06	0	0
Viral_bacteria__Siphoviridae Siphoviridae_Unclassified__Staphylococcus phage phiRS7	4.19754e-06	0	2.02534e-05	5.51228e-06	7.72559e-05	0	0.00023218	5.36944e-06	0.000105622	0.000315063	0.00110875	1.87047e-05	0.000187786	0.000165327
Viral_bacteria__Siphoviridae Siphoviridae_Unclassified__Staphylococcus phage ROSA	0.000258674	0	0	0	0	0.000150519	0	0	0	1.12523e-05	0.000461238	9.35235e-07	2.50382e-05	0
Viral_bacteria__Siphoviridae Siphoviridae_Unclassified__Staphylococcus phage SA97	0	0	2.02534e-05	0	0	0	0.000154787	0	0	1.12523e-05	0	0	0	0
Viral_bacteria__Siphoviridae Siphoviridae_Unclassified__Staphylococcus phage SMSAP5	5.24693e-07	0	0	1.10246e-05	2.5752e-05	2.50865e-05	0.00023218	3.57962e-06	6.60136e-05	2.25045e-05	0	0	3.75573e-05	0
Viral_bacteria__Siphoviridae Siphoviridae_Unclassified__Staphylococcus phage StauST398-1	0	0	0	0	7.72559e-05	0	0.000386967	3.57962e-06	0.00014523	0	8.86997e-06	1.96399e-05	0	0
Viral_bacteria__Siphoviridae Siphoviridae_Unclassified__Staphylococcus phage StauST398-2	5.24693e-07	0	0	1.10246e-05	0	2.50865e-05	0.000154787	0	3.96081e-05	2.25045e-05	4.43498e-05	0	0	0
Viral_bacteria__Siphoviridae Siphoviridae_Unclassified__Staphylococcus phage StauST398-4	3.14816e-06	1.91791e-05	0.000101267	0.000231516	0.000103008	5.01731e-05	0	2.32676e-05	0.000409284	0.000157532	0.000798297	1.87047e-06	0.000338015	0
Viral_bacteria__Siphoviridae Siphoviridae_Unclassified__Staphylococcus phage StauST398-5	6.82101e-06	0	3.03801e-05	6.06351e-05	0.00025752	0.000275952	0.000154787	1.61083e-05	0.000132027	0.000641379	0.000230619	4.3956e-05	0.000312977	0.00049598
Viral_bacteria__Siphoviridae Siphoviridae_Unclassified__Staphylococcus phage StB12	5.77162e-06	0	3.03801e-05	0	0	0.000225779	0	8.94906e-06	5.28109e-05	6.75136e-05	0.00010644	7.48188e-05	0.000538321	0.000392651
Viral_bacteria__Siphoviridae Siphoviridae_Unclassified__Staphylococcus phage StB20	7.3457e-06	6.39304e-06	5.06334e-05	2.75614e-05	0.00252369	7.52596e-05	0.000773934	3.57962e-06	0.00382879	0.000303811	0.00323754	0.000501286	3.75573e-05	0.00144661
Viral_bacteria__Siphoviridae Siphoviridae_Unclassified__Staphylococcus phage StB20-like	8.91978e-06	0	6.07601e-05	2.20491e-05	0.000334775	0.000451558	0.00100611	1.78981e-05	0.000937393	0.000281307	9.75696e-05	2.89923e-05	0.000338015	0.00126062
Viral_bacteria__Siphoviridae Siphoviridae_Unclassified__Staphylococcus phage StB27	8.91978e-06	0	2.02534e-05	5.51228e-06	0	2.50865e-05	0.000309574	1.07389e-05	0.000739352	7.87659e-05	0.00252794	5.42436e-05	0.00068855	0.000123995
Viral_bacteria__Siphoviridae Siphoviridae_Unclassified__Staphylococcus phage TEM123	0	0	0	5.51228e-06	2.5752e-05	2.50865e-05	0.000309574	3.57962e-06	0.000382879	3.37568e-05	0.00172964	1.87047e-05	0	0
Viral_bacteria__Siphoviridae Siphoviridae_Unclassified__Staphylococcus phage tp310-2	3.14816e-06	0	0	0	2.5752e-05	0	0.000154787	0	0.000871379	0	2.66099e-05	0	0	0
Viral_bacteria__Siphoviridae Siphoviridae_Unclassified__Staphylococcus phage vB_SauS_phi2	0	0	1.01267e-05	0	0	0	0	0	0.00014523	0	8.86997e-06	0	0	2.06659e-05
Viral_bacteria__Siphoviridae Siphoviridae_Unclassified__Streptococcus phage 5093	0.0200679	6.39304e-06	0.000141774	0.000165369	0	2.50865e-05	0.000386967	4.29555e-05	0.000211243	0.00010127	0.000150789	1.12228e-05	0.00167756	0.00865899
Viral_bacteria__Siphoviridae Siphoviridae_Unclassified__Streptococcus phage APCM01	1.04939e-06	0	0	5.51228e-06	0	0	0.000696541	0	0.000105622	9.00181e-05	0.00161433	0	3.75573e-05	4.13317e-05
Viral_bacteria__Siphoviridae Siphoviridae_Unclassified__Streptococcus phage Dp-1	8.39509e-06	6.39304e-06	0.00027342	0.000347274	0.000463535	0.000777683	0.00332792	8.05415e-05	0.00179557	0.00375826	0.00237715	7.76245e-05	0.00267909	0.000557978
Viral_bacteria__Siphoviridae Siphoviridae_Unclassified__Streptococcus phage M102	0	0	0	0	2.5752e-05	2.50865e-05	0	0	2.64054e-05	1.12523e-05	0.000576548	2.33809e-05	1.25191e-05	0
Viral_bacteria__Siphoviridae Siphoviridae_Unclassified__Streptococcus phage M102AD	0	0	0	0	0	0	0.000851327	0	0	1.12523e-05	8.86997e-06	0	0	0
Viral_bacteria__Siphoviridae Siphoviridae_Unclassified__Streptococcus phage MM1	0.0086291	0	0	2.20491e-05	0.000103008	0.00105364	0.00216701	0.000510096	0.000448892	5.62613e-05	0.00123293	1.49638e-05	0.02624	0.000206659
Viral_bacteria__Siphoviridae Siphoviridae_Unclassified__Streptococcus phage P9	0.0127721	0	1.01267e-05	4.96106e-05	5.15039e-05	7.52596e-05	0.00185744	2.14777e-05	0.00203322	0.000157532	0.000727337	1.30933e-05	0.000287939	0.00024799
Viral_bacteria__Siphoviridae Siphoviridae_Unclassified__Streptococcus phage PH10	0.000129599	0	0	5.51228e-06	7.72559e-05	0.000953289	0.00394706	6.08536e-05	0.000514906	0.00192414	0.00156998	4.67617e-06	0.00141466	2.06659e-05
Viral_bacteria__Siphoviridae Siphoviridae_Unclassified__Streptococcus phage PH15	0.00645792	6.39304e-06	1.01267e-05	1.10246e-05	5.15039e-05	0.015353	0.00023218	8.41211e-05	0.000330068	0.000168784	7.09597e-05	1.21581e-05	0.0019655	0
Viral_bacteria__Siphoviridae Siphoviridae_Unclassified__Streptococcus phage phi3396	0.000975404	0	1.01267e-05	1.10246e-05	0	0	0.00046436	9.486e-05	0.000594122	0.000652631	0.000993436	3.74094e-06	0.000262901	2.06659e-05
Viral_bacteria__Siphoviridae Siphoviridae_Unclassified__Streptococcus phage phiARI0468-4	0.00250121	0	0	1.65369e-05	5.15039e-05	2.50865e-05	7.73934e-05	1.61083e-05	0.000118824	9.00181e-05	0.00117084	3.36685e-05	0.000175267	0
Viral_bacteria__Siphoviridae Siphoviridae_Unclassified__Streptococcus phage phiARI0746	1.57408e-06	0	0	0	5.15039e-05	0	0.000154787	5.7274e-05	0.000277257	3.37568e-05	0.000212879	1.49638e-05	0.00027542	2.06659e-05
Viral_bacteria__Siphoviridae Siphoviridae_Unclassified__Streptococcus phage phiARI0923	0	0	3.03801e-05	4.40983e-05	0	2.50865e-05	0.000773934	1.96879e-05	0.000396081	2.25045e-05	0.000212879	3.1798e-05	6.25955e-05	6.19976e-05
Viral_bacteria__Siphoviridae Siphoviridae_Unclassified__Streptococcus phage phiNJ2	0.00239208	0	0	0	5.15039e-05	0.000677337	0.00178005	0.000103809	0.0038684	0.00024755	0.00310449	0.000432079	0.0156113	6.19976e-05
Viral_bacteria__Siphoviridae Siphoviridae_Unclassified__Streptococcus phage SM1	0.0122348	0	3.03801e-05	4.40983e-05	0.000154512	0.000903116	0.00503057	0.00462666	0.0164902	0.000618875	0.00273195	0.000173018	0.00171512	0.000103329
Viral_bacteria__Siphoviridae Siphoviridae_Unclassified__Streptococcus phage SMP	1.67902e-05	0	0	2.20491e-05	0.000309023	0.000175606	0.000386967	3.22166e-05	0.000580919	0.000787659	0.000168529	3.83446e-05	0.000676031	0
Viral_bacteria__Siphoviridae Siphoviridae_Unclassified__Streptococcus phage SpSL1	5.24693e-07	0	1.01267e-05	1.65369e-05	7.72559e-05	2.50865e-05	0.000541754	1.43185e-05	0.00063373	0.00034882	0.0024215	3.46037e-05	0.00013771	6.19976e-05
Viral_bacteria__Siphoviridae Siphoviridae_Unclassified__Streptococcus phage TP-778L	5.24693e-07	0	0.000111394	4.40983e-05	5.15039e-05	0	7.73934e-05	1.07389e-05	5.28109e-05	0.000191288	0.000558808	1.40285e-05	0.000588397	0.0008473
Viral_bacteria__Siphoviridae Siphoviridae_Unclassified__Streptococcus phage TP-J34	2.62347e-06	6.39304e-06	0.00012152	0.000176393	2.5752e-05	0.000100346	0	1.78981e-06	1.32027e-05	3.37568e-05	8.86997e-06	4.67617e-06	5.00764e-05	0.000743971
Viral_bacteria__Siphoviridae Siphoviridae_Unclassified__Streptococcus phage YMC-2011	2.09877e-06	1.27861e-05	0.000253167	0.000137807	2.5752e-05	0	0	1.61083e-05	6.60136e-05	1.12523e-05	0.000771687	4.67617e-06	0.000112672	0.00128128
Viral_bacteria__Siphoviridae Siphoviridae_Unclassified__Streptococcus virus 9871	0.00013642	6.39304e-06	0.000516461	0.000303176	2.5752e-05	2.50865e-05	0.000309574	2.32676e-05	0.00151831	0.00010127	0.000487848	1.02876e-05	0.00260397	0.000971295
Viral_bacteria__Siphoviridae Siphoviridae_Unclassified__Streptococcus virus 9872	1.04939e-06	0	0.000101267	7.16597e-05	0	0	7.73934e-05	0	0.000105622	2.25045e-05	0.000150789	0	0.000513283	0.000371985
Viral_bacteria__Siphoviridae Siphoviridae_Unclassified__Streptococcus virus 9874	0.000105463	0	7.08868e-05	6.61474e-05	0.000180264	0.000100346	0	1.78981e-06	3.96081e-05	2.25045e-05	0.000150789	9.35235e-07	0.00027542	0.000268656
Viral_bacteria__Siphoviridae Siphoviridae_Unclassified__Streptomyce phage TG1	0	0	0	0	0	2.50865e-05	0	0	1.32027e-05	0.000225045	0	6.54664e-06	2.50382e-05	0
Viral_bacteria__Siphoviridae Siphoviridae_Unclassified__Streptomyces phage Caliburn	1.83643e-05	1.91791e-05	0.000111394	0.00012127	0.000412031	0.000301039	0.00123829	4.65351e-05	0.000646933	0.00137278	0.000452368	9.72644e-05	0.00125191	0.000661307
Viral_bacteria__Siphoviridae Siphoviridae_Unclassified__Streptomyces phage Izzy	1.04939e-06	0	8.10135e-05	3.30737e-05	5.15039e-05	0.000225779	0.000696541	7.15925e-06	0.000237649	9.00181e-05	0.00012418	6.54664e-06	0.000162748	0
Viral_bacteria__Siphoviridae Siphoviridae_Unclassified__Streptomyces phage Jay2Jay	7.3457e-06	0	4.05067e-05	3.30737e-05	0.000206016	7.52596e-05	0.000386967	1.96879e-05	0.000660136	0.000303811	0.000186269	1.5899e-05	0.000100153	0.000330654
Viral_bacteria__Siphoviridae Siphoviridae_Unclassified__Streptomyces phage Lannister	1.25926e-05	1.27861e-05	6.07601e-05	0.000126783	0.000489287	0.000677337	0.000386967	4.83249e-05	0.000699744	0.00162033	0.000470108	0.000114099	0.00107664	0.000909298
Viral_bacteria__Siphoviridae Siphoviridae_Unclassified__Streptomyces phage Lika	1.25926e-05	0	7.08868e-05	3.8586e-05	0.000360527	0.000627164	0.000309574	1.25287e-05	0.000528109	0.00151906	0.000195139	6.07903e-05	0.000989008	0.000764637
Viral_bacteria__Siphoviridae Siphoviridae_Unclassified__Streptomyces phage Nanodon	2.62347e-06	0	0	1.10246e-05	0	0	0.00170265	5.36944e-06	7.92163e-05	1.12523e-05	1.77399e-05	1.87047e-06	1.25191e-05	0.000392651
Viral_bacteria__Siphoviridae Siphoviridae_Unclassified__Streptomyces phage Sujidade	1.04939e-06	1.27861e-05	3.03801e-05	0	0	2.50865e-05	0	3.57962e-06	0	2.25045e-05	0.00010644	0	1.25191e-05	0.00024799
Viral_bacteria__Siphoviridae Siphoviridae_Unclassified__Streptomyces phage Zemlya	3.67285e-06	0	1.01267e-05	3.8586e-05	0	2.50865e-05	0	3.57962e-06	7.92163e-05	7.87659e-05	8.86997e-06	0	8.76336e-05	0.000185993
Viral_bacteria__Siphoviridae Siphoviridae_Unclassified__Synechococcus phage S-CBS2	5.24693e-07	6.39304e-06	2.02534e-05	0	0.000334775	0	0	0	0.000237649	0.000315063	1.77399e-05	3.64742e-05	3.75573e-05	0
Viral_bacteria__Siphoviridae Siphoviridae_Unclassified__Synechococcus phage S-CBS3	2.62347e-06	2.55722e-05	8.10135e-05	0.000110246	0.000566543	0.00105364	0.000619147	3.40064e-05	0.000594122	0.00366824	0.000328189	0.00028057	0.00096397	0.000268656
Viral_bacteria__Siphoviridae Siphoviridae_Unclassified__Synechococcus phage S-CBS4	5.24693e-07	0	0	5.51228e-06	2.5752e-05	2.50865e-05	0	0	0.000356473	0	0	0	2.50382e-05	0
Viral_bacteria__Siphoviridae Siphoviridae_Unclassified__Synechococcus phage S-SKS1	3.20063e-05	2.55722e-05	0.000283547	0.000363811	0.000180264	7.52596e-05	0.000541754	2.68472e-05	0.00217845	0.000146279	0.000283839	4.67617e-06	0.00251634	0.000392651
Viral_bacteria__Siphoviridae Siphoviridae_Unclassified__Temperate phage phiNIH1.1	0.00327041	0	0	5.51228e-06	5.15039e-05	0.000175606	0.00325052	2.50574e-05	0.000171635	0.000382577	0.000558808	9.35235e-06	0.00068855	0.000206659
Viral_bacteria__Siphoviridae Siphoviridae_Unclassified__Thermoanaerobacterium phage THSA-485A	5.24693e-07	1.27861e-05	3.03801e-05	6.61474e-05	7.72559e-05	0	0.00201223	3.40064e-05	0.000514906	0.00024755	9.75696e-05	9.35235e-06	0.000325496	0
Viral_bacteria__Siphoviridae Siphoviridae_Unclassified__Tsukamurella phage TPA2	5.24693e-07	0	0	0	0.000386279	2.50865e-05	0.048603	5.36944e-06	0.0078028	0.000168784	8.86997e-06	0	0.000363054	4.13317e-05
Viral_bacteria__Siphoviridae Siphoviridae_Unclassified__Verrucomicrobia phage P8625	7.45064e-05	0	1.01267e-05	1.65369e-05	5.15039e-05	0.000326125	0.00023218	6.26434e-05	0.000369676	2.25045e-05	0.000133049	2.8057e-06	0.000588397	0
Viral_bacteria__Siphoviridae Siphoviridae_Unclassified__Vibrio phage pYD38-B	0	0	1.01267e-05	1.10246e-05	0	0	0	5.36944e-06	0.00014523	6.75136e-05	1.77399e-05	0	0	0
Viral_bacteria__Siphoviridae Siphoviridae_Unclassified__Vibrio phage SIO-2	2.62347e-06	0	7.08868e-05	0.00012127	0.000875567	0.00127941	0.000696541	2.32676e-05	0.000330068	0.00155281	0.000443498	0.000102876	0.00271664	0.000185993
Viral_bacteria__Siphoviridae Siphoviridae_Unclassified__Weissella phage WCP30	0	0	1.01267e-05	5.51228e-06	0	5.01731e-05	0	5.01147e-05	2.64054e-05	7.87659e-05	0.00625333	5.61141e-06	0.000237863	0
Viral_bacteria__Siphoviridae Sitaravirus__Paenibacillus virus Diva	0	0	0	0	0	0	0	0	0.00100341	3.37568e-05	1.77399e-05	9.35235e-07	0	0
Viral_bacteria__Siphoviridae Sitaravirus__Paenibacillus virus Hb10c2	4.66977e-05	0	0	1.65369e-05	5.15039e-05	0.000225779	0.000386967	1.07389e-05	0.00014523	5.62613e-05	0.000665247	5.61141e-06	0.000200305	2.06659e-05
Viral_bacteria__Siphoviridae Sitaravirus__Paenibacillus virus Rani	0	0	0	0	0	0	0.000154787	3.57962e-06	1.32027e-05	5.62613e-05	4.43498e-05	0	1.25191e-05	0
Viral_bacteria__Siphoviridae Sk1virus__Lactococcus virus 712	4.72224e-06	0	1.01267e-05	4.40983e-05	7.72559e-05	7.52596e-05	0.000154787	1.43185e-05	0.000264054	1.12523e-05	0.0011531	7.48188e-06	6.25955e-05	8.26634e-05
Viral_bacteria__Siphoviridae Sk1virus__Lactococcus virus ASCC191	3.14816e-06	6.39304e-06	3.03801e-05	1.10246e-05	7.72559e-05	5.01731e-05	0	0.000109179	6.60136e-05	3.37568e-05	1.77399e-05	1.77695e-05	1.25191e-05	0.000144661
Viral_bacteria__Siphoviridae Sk1virus__Lactococcus virus Bibb29	3.14816e-06	0	6.07601e-05	8.26843e-05	0.000103008	2.50865e-05	0	1.61083e-05	1.32027e-05	1.12523e-05	8.86997e-06	9.35235e-07	1.25191e-05	0.000144661
Viral_bacteria__Siphoviridae Sk1virus__Lactococcus virus bIL170	2.09877e-06	0	1.01267e-05	9.37088e-05	0.000103008	2.50865e-05	0	2.50574e-05	1.32027e-05	0	0	4.67617e-06	0	6.19976e-05
Viral_bacteria__Siphoviridae Sk1virus__Lactococcus virus CB13	2.09877e-06	0	4.05067e-05	3.30737e-05	0.000154512	0.000100346	0.000386967	1.43185e-05	3.96081e-05	1.12523e-05	0.000337059	1.87047e-06	0	0
Viral_bacteria__Siphoviridae Sk1virus__Lactococcus virus CB14	3.14816e-06	0	4.05067e-05	1.10246e-05	0.000103008	0.000100346	0.000154787	2.8637e-05	0	0	0	1.87047e-06	1.25191e-05	2.06659e-05
Viral_bacteria__Siphoviridae Sk1virus__Lactococcus virus P008	1.04939e-06	0	1.01267e-05	1.65369e-05	0.000206016	7.52596e-05	7.73934e-05	1.43185e-05	1.32027e-05	0	0	1.87047e-06	0	6.19976e-05
Viral_bacteria__Siphoviridae Sk1virus__Lactococcus virus Sl4	5.24693e-07	1.27861e-05	0	0	0.00012876	0	0	5.36944e-06	2.64054e-05	1.12523e-05	1.77399e-05	1.87047e-06	0	4.13317e-05
Viral_bacteria__Siphoviridae Slashvirus__Bacillus virus Slash	5.24693e-07	0	0	4.40983e-05	0.000103008	0	7.73934e-05	3.57962e-06	0.000224446	5.62613e-05	0.000372539	1.21581e-05	0.00013771	2.06659e-05
Viral_bacteria__Siphoviridae Slashvirus__Bacillus virus Stills	5.24693e-07	0	0	2.75614e-05	2.5752e-05	0	0.000154787	1.78981e-06	0.00645613	0.000168784	1.77399e-05	0	2.50382e-05	0
Viral_bacteria__Siphoviridae Smoothievirus__Gordonia virus OneUp	7.3457e-06	0	3.03801e-05	1.10246e-05	2.5752e-05	2.50865e-05	0.00023218	0	6.60136e-05	2.25045e-05	2.66099e-05	2.8057e-06	0	0.000206659
Viral_bacteria__Siphoviridae Sp31virus__Salmonella virus SP31	5.24693e-07	0	3.03801e-05	0.000308688	7.72559e-05	0	7.73934e-05	0	0.00118824	2.25045e-05	0	8.13654e-05	1.25191e-05	0
Viral_bacteria__Siphoviridae Spbetavirus__Bacillus virus SPbeta	5.87656e-05	1.27861e-05	0.000131647	0.000237028	0.00321899	0.0018564	0.00425664	5.7274e-05	0.00496422	0.00845045	0.000603158	0.000495675	0.00473222	0.000268656
Viral_bacteria__Siphoviridae Spbetavirus__Staphylococcus phage SPbeta-like	3.41051e-05	6.39304e-05	0.00012152	0.000330737	0.000515039	0.00122924	0.000773934	1.78981e-05	0.00168995	0.00248675	0.000186269	5.79846e-05	0.00096397	0.00293455
Viral_bacteria__Siphoviridae Ssp2virus__Vibrio virus MAR10	0	0	0	1.65369e-05	0	0	0	0	5.28109e-05	9.00181e-05	8.86997e-05	9.35235e-07	0.000112672	0
Viral_bacteria__Siphoviridae T1virus__Cronobacter virus ESP29491	6.24385e-05	0.00253165	0.000921528	0.00657064	0	0	0	0	3.96081e-05	0	3.54799e-05	9.35235e-07	0	4.13317e-05
Viral_bacteria__Siphoviridae T1virus__Escherichia phage EB49	1.04939e-06	0.000127861	3.03801e-05	0.000226004	0	0	0	0	0	0	0	0	0	0
Viral_bacteria__Siphoviridae T1virus__Escherichia virus ADB2	2.88581e-05	0.00148958	0.000607601	0.00405153	0	0	0	0	0	0	0	0	1.25191e-05	2.06659e-05
Viral_bacteria__Siphoviridae T1virus__Escherichia virus T1	4.19754e-06	0.000249329	4.05067e-05	0.000452007	0	0	0	0	0	0	0	0	0	0
Viral_bacteria__Siphoviridae T1virus__Shigella virus PSf2	1.31173e-05	0.000537016	0.000253167	0.00144422	0	0	0	0	0	0	0	0	0	0
Viral_bacteria__Siphoviridae T1virus__Shigella virus Shfl1	7.3457e-06	0.000108682	5.06334e-05	0.000209467	0	0	0	0	0	0	0	0	0	0
Viral_bacteria__Siphoviridae T5virus__Escherichia virus AKFV33	5.24693e-07	0	0	0	0	0	0.000773934	0	0	0	0	0	1.25191e-05	0
Viral_bacteria__Siphoviridae T5virus__Escherichia virus EPS7	0	0	0	1.65369e-05	2.5752e-05	0	0	1.78981e-06	1.32027e-05	0.000146279	8.86997e-06	0	1.25191e-05	0
Viral_bacteria__Siphoviridae T5virus__Escherichia virus slur09	2.09877e-06	0	0	5.51228e-06	0	0	7.73934e-05	0	0.00179557	0	8.86997e-06	0	1.25191e-05	0
Viral_bacteria__Siphoviridae T5virus__Vibrio phage phi 3	3.67285e-06	6.39304e-06	0	1.10246e-05	7.72559e-05	2.50865e-05	0.00046436	3.57962e-06	0.00155792	0.00162033	0.000133049	7.38836e-05	0.000212825	0.000123995
Viral_bacteria__Siphoviridae T5virus__Vibrio phage pVp-1	5.77162e-06	1.27861e-05	4.05067e-05	3.30737e-05	7.72559e-05	2.50865e-05	0.000154787	5.36944e-06	0.000132027	5.62613e-05	0.00010644	2.71218e-05	8.76336e-05	8.26634e-05
Viral_bacteria__Siphoviridae Titanvirus__Rhodobacter virus RcTitan	0	0	0	0	0	0.0251116	0	0	0	0	8.86997e-06	0	0.000863817	0
Viral_bacteria__Siphoviridae Tlsvirus__Escherichia virus TLS	4.19754e-06	0.000402762	9.11402e-05	0.000837867	0	0	0	0	0	0	0	0	0	2.06659e-05
Viral_bacteria__Siphoviridae Tp21virus__Bacillus virus BMBtp2	0	0	0	0	0	0.000225779	0.000154787	3.57962e-06	0	0.000112523	0	0	0.000325496	0
Viral_bacteria__Siphoviridae Triavirus__Staphylococcus phage 42E	1.10186e-05	0	1.01267e-05	2.75614e-05	0	0	0	1.78981e-06	0.000132027	0	4.43498e-05	0	0	0.000433983
Viral_bacteria__Siphoviridae Triavirus__Staphylococcus phage Ipla35	7.81793e-05	0	0	5.51228e-06	0	0	7.73934e-05	0	0.000105622	0	3.54799e-05	9.35235e-07	1.25191e-05	0
Viral_bacteria__Siphoviridae Woesvirus__Gordonia virus Hotorobo	0	0	0	1.10246e-05	0	2.50865e-05	0	1.78981e-06	0	0	0.000186269	0	2.50382e-05	0
Viral_bacteria__Siphoviridae Xp10virus__Xanthomonas phage Xp10	0	0	0	0	0	2.50865e-05	0	1.78981e-06	0	0.000281307	1.77399e-05	0	1.25191e-05	0
Viral_bacteria__Siphoviridae Ydn12virus__Streptomyces virus YDN12	1.04939e-06	0	0	0	5.15039e-05	2.50865e-05	0	0	1.32027e-05	0	0.000186269	0	1.25191e-05	0
Viral_bacteria__Siphoviridae Yuavirus__Pseudomonas phage M6	5.24693e-07	0	0	1.65369e-05	0	0	0.000154787	0	5.28109e-05	1.12523e-05	1.77399e-05	0	2.50382e-05	0
Viral_bacteria__Siphoviridae Yuavirus__Pseudomonas virus MP1412	1.04939e-06	0	0	5.51228e-06	0	0	0.000154787	0	0	9.00181e-05	0	0	0	0
Viral_bacteria__Sodalis phage phiSG1 Sodalis phage phiSG1_Unclassified__Sodalis phage phiSG1	4.04014e-05	0	8.10135e-05	1.65369e-05	0	0	0	0	0.000171635	1.12523e-05	8.86997e-06	9.35235e-07	0.00027542	2.06659e-05
Viral_bacteria__Staphylococcus phage PT1028 Staphylococcus phage PT1028_Unclassified__Staphylococcus phage PT1028	2.09877e-06	0	3.03801e-05	0	0.000206016	5.01731e-05	0	0	0	0.000112523	0	3.55389e-05	0.00013771	0.000268656
Viral_bacteria__Streptococcus phage 20617 Streptococcus phage 20617_Unclassified__Streptococcus phage 20617	0.000712533	3.19652e-05	0.000678488	0.000854404	0.00141636	0.0018564	0.000851327	0.000182561	0.00415886	0.00487223	0.00217314	0.000258125	0.00348031	0.00630309
Viral_bacteria__Streptococcus phage DCC1738 Streptococcus phage DCC1738_Unclassified__Streptococcus phage DCC1738	1.04939e-06	0	0	0	0	2.50865e-05	0.000386967	3.57962e-06	0.000277257	0.00010127	0.0129147	0	2.50382e-05	0
Viral_bacteria__Streptococcus phage phiARI0131-1 Streptococcus phage phiARI0131-1_Unclassified__Streptococcus phage phiARI0131-1	5.24693e-07	0	2.02534e-05	0	0	0.000150519	7.73934e-05	1.07389e-05	6.60136e-05	3.37568e-05	4.43498e-05	1.87047e-06	0.000638474	2.06659e-05
Viral_bacteria__Streptococcus phage phiARI0131-2 Streptococcus phage phiARI0131-2_Unclassified__Streptococcus phage phiARI0131-2	5.24693e-07	0	0	5.51228e-06	0.00012876	0.00998445	0.000696541	4.47453e-05	0.000752555	0.00717894	0.00327302	3.74094e-06	0.00189038	2.06659e-05
Viral_bacteria__Streptococcus phage phiARI0460-1 Streptococcus phage phiARI0460-1_Unclassified__Streptococcus phage phiARI0460-1	5.24693e-07	0	2.02534e-05	0	0	0	0	0	0	0	0	0	0	0.000289322
Viral_bacteria__Streptococcus phage phiARI0462 Streptococcus phage phiARI0462_Unclassified__Streptococcus phage phiARI0462	0	0	0	0	0	0	0	0	0.000118824	1.12523e-05	0.000239489	9.35235e-07	3.75573e-05	2.06659e-05
Viral_bacteria__Sulfitobacter phage NYA-2014a Sulfitobacter phage NYA-2014a_Unclassified__Sulfitobacter phage NYA-2014a	5.24693e-07	0	2.02534e-05	5.51228e-06	0	0	0.00023218	0	6.60136e-05	0	8.86997e-06	0	0	0
Viral_bacteria__Sulfitobacter phage pCB2047-C Sulfitobacter phage pCB2047-C_Unclassified__Sulfitobacter phage pCB2047-C	0	0	0	0	0	0.000125433	0	0	0	0	0	0	0.00096397	0
Viral_bacteria__Synechococcus phage S-CAM7 Synechococcus phage S-CAM7_Unclassified__Synechococcus phage S-CAM7	5.77162e-06	0	2.02534e-05	3.8586e-05	5.15039e-05	2.50865e-05	0.000773934	8.94906e-06	0.00133347	7.87659e-05	6.20898e-05	3.46037e-05	0.000500764	6.19976e-05
Viral_bacteria__Synechococcus phage S-CAM9 Synechococcus phage S-CAM9_Unclassified__Synechococcus phage S-CAM9	0	0	0	1.10246e-05	0	2.50865e-05	0.00023218	0	1.32027e-05	3.37568e-05	3.54799e-05	6.54664e-06	7.51145e-05	0.000123995
Viral_bacteria__Tectiviridae Tectivirus__Bacillus phage GIL16c	0	0	0	0	0	0	0	0	0	0	0	0	0.000112672	0
Viral_bacteria__Tetrasphaera phage TJE1 Tetrasphaera phage TJE1_Unclassified__Tetrasphaera phage TJE1	0	0	1.01267e-05	0	0	2.50865e-05	0.000154787	0	0.000105622	0.000135027	0.00180947	9.35235e-07	0.00027542	0
Viral_bacteria__Thermus phage phi OH2 Thermus phage phi OH2_Unclassified__Phage phi OH2	0	0	0	3.8586e-05	5.15039e-05	5.01731e-05	0.00131569	6.6223e-05	0.00100341	0.0004951	0.00134823	2.24456e-05	0.000438168	4.13317e-05
Viral_bacteria__uncultured crAssphage uncultured crAssphage_Unclassified__Uncultured phage crAssphage	6.87348e-05	8.31096e-05	0.000202534	0.000347274	0.652838	0.00338668	0.0297191	0.0132052	0.00447572	0.414556	8.86997e-06	0.959646	0.0538822	2.06659e-05
Viral_bacteria__Vibrio phage eugene 12A10 Vibrio phage eugene 12A10_Unclassified__Vibrio phage eugene 12A10	4.19754e-06	0	0	5.51228e-06	5.15039e-05	0	0	0	0.00043569	0.000517604	8.86997e-06	3.27332e-05	0	6.19976e-05
Viral_bacteria__Vibrio phage helene 12B3 Vibrio phage helene 12B3_Unclassified__Vibrio phage helene 12B3	5.24693e-07	0	1.01267e-05	1.65369e-05	7.72559e-05	0	0	5.36944e-06	0.00014523	3.37568e-05	8.86997e-06	8.41711e-06	2.50382e-05	0
Viral_bacteria__Vibrio phage henriette 12B8 Vibrio phage henriette 12B8_Unclassified__Vibrio phage henriette 12B8	2.62347e-05	0	0.00012152	8.26843e-05	0.000386279	0.000777683	0.000309574	2.8637e-05	0.000580919	0.000956442	0.000195139	4.58265e-05	0.000876336	0.000268656
Viral_bacteria__Vibrio phage PWH3a-P1 Vibrio phage PWH3a-P1_Unclassified__Vibrio phage PWH3a-P1	3.14816e-06	0	2.02534e-05	2.20491e-05	2.5752e-05	5.01731e-05	0	3.57962e-06	0.000105622	6.75136e-05	8.86997e-05	1.02876e-05	8.76336e-05	0
Viral_bacteria__Vibrio phage pYD38-A Vibrio phage pYD38-A_Unclassified__Vibrio phage pYD38-A	1.04939e-06	0	0	0.000104733	0	0	7.73934e-05	0	3.96081e-05	0.000528856	8.86997e-06	0	3.75573e-05	0
Viral_bacteria__Vibrio phage qdvp001 Vibrio phage qdvp001_Unclassified__Vibrio phage qdvp001	5.77162e-06	0	6.07601e-05	9.92211e-05	0.000360527	0.000401385	0.00023218	1.61083e-05	0.00118824	0.000967695	0.000177399	5.33084e-05	0.000375573	0.000144661
Viruses below 0.01% in all samples	0.00118791	0.000345224	0.00232914	0.00221043	0.00249794	0.00230796	0.00510796	0.000774988	0.00846294	0.00488348	0.00456803	0.000860416	0.00539573	0.00464982
